# Supplementary material for: Acute Hypoxia Alters Extracellular Vesicle Signatures and the Brain Citrullinome of Naked Mole-Rats (Heterocephalus glaber)
Source: MDPI journal article supplement (doi:10.3390/ijms23094683), 2022-04-23
Supplement: s1 [file s1]

**Supplementary Table S1. The brain citrullinome in normoxia.** Full list of naked mole-rat protein hits from LC-MS/MS analysis of F95 enriched proteins isolated from brains of naked mole-rats (*Heterocephalus glaber*) following normoxia; hits specific for the normoxia group only are highlighted in blue.

| Protein ID | Protein name                                                                                                          |
|------------|-----------------------------------------------------------------------------------------------------------------------|
| G5ASE4     | Spectrin alpha chain, brain OS= <i>Heterocephalus glaber</i> OX=10181 GN=GW7_01914 PE=4 SV=1                          |
| G5B8V8     | Spectrin beta chain OS= <i>Heterocephalus glaber</i> OX=10181 GN=GW7_15253 PE=3 SV=1                                  |
| G5AZQ6     | Sodium/potassium-transporting ATPase subunit alpha OS= <i>Heterocephalus glaber</i> OX=10181 GN=GW7_15424 PE=3 SV=1   |
| G5BFJ7     | Sodium/potassium-transporting ATPase subunit alpha OS= <i>Heterocephalus glaber</i> OX=10181 GN=GW7_09834 PE=3 SV=1   |
| G5BY99     | Dihydropyrimidinase-related protein 2 (Fragment) OS= <i>Heterocephalus glaber</i> OX=10181 GN=GW7_07625 PE=4 SV=1     |
| G5BL81     | ATP synthase subunit alpha OS= <i>Heterocephalus glaber</i> OX=10181 GN=ATP5A1 PE=3 SV=1                              |
| G5BWK9     | Sodium/potassium-transporting ATPase subunit alpha-2 OS= <i>Heterocephalus glaber</i> OX=10181 GN=GW7_00530 PE=3 SV=1 |
| G5C895     | Clathrin heavy chain OS= <i>Heterocephalus glaber</i> OX=10181 GN=GW7_08300 PE=3 SV=1                                 |
| G5BB67     | ATP synthase subunit beta OS= <i>Heterocephalus glaber</i> OX=10181 GN=GW7_15746 PE=3 SV=1                            |
| G5ASF4     | Dynamin-1 (Fragment) OS= <i>Heterocephalus glaber</i> OX=10181 GN=GW7_01924 PE=3 SV=1                                 |
| G5BHB1     | Pyruvate kinase OS= <i>Heterocephalus glaber</i> OX=10181 GN=GW7_06053 PE=3 SV=1                                      |
| G5BVT0     | Malic enzyme OS= <i>Heterocephalus glaber</i> OX=10181 GN=GW7_16261 PE=3 SV=1                                         |
| G5C9E0     | DmX-like protein 2 OS= <i>Heterocephalus glaber</i> OX=10181 GN=GW7_04224 PE=4 SV=1                                   |
| G5BLH0     | Syntaxin-binding protein 1 OS= <i>Heterocephalus glaber</i> OX=10181 GN=GW7_06738 PE=3 SV=1                           |
| G5ATF9     | Glutamate dehydrogenase 1, mitochondrial OS= <i>Heterocephalus glaber</i> OX=10181 GN=GW7_14620 PE=3 SV=1             |
| G5AU27     | Tubulin alpha chain OS= <i>Heterocephalus glaber</i> OX=10181 GN=GW7_14459 PE=3 SV=1                                  |
| G5BS02     | Heat shock cognate 71 kDa protein OS= <i>Heterocephalus glaber</i> OX=10181 GN=GW7_03309 PE=3 SV=1                    |
| G5BFZ1     | Tubulin beta chain OS= <i>Heterocephalus glaber</i> OX=10181 GN=GW7_03924 PE=3 SV=1                                   |
| G5B184     | Hexokinase-1 OS= <i>Heterocephalus glaber</i> OX=10181 GN=GW7_10633 PE=3 SV=1                                         |
| G5AKJ8     | Tubulin alpha chain OS= <i>Heterocephalus glaber</i> OX=10181 GN=GW7_07278 PE=3 SV=1                                  |
| G5B0C4     | Synapsin-1 OS= <i>Heterocephalus glaber</i> OX=10181 GN=GW7_10284 PE=4 SV=1                                           |
| G5C546     | Alpha-enolase OS= <i>Heterocephalus glaber</i> OX=10181 GN=GW7_09136 PE=2 SV=1                                        |
| G5APH2     | Tubulin beta chain OS= <i>Heterocephalus glaber</i> OX=10181 GN=GW7_12416 PE=3 SV=1                                   |
| G5BW26     | Non-POU domain-containing octamer-binding protein OS= <i>Heterocephalus glaber</i> OX=10181 GN=NONO PE=4 SV=1         |
| G5CAP7     | Glyceraldehyde-3-phosphate dehydrogenase (Fragment) OS= <i>Heterocephalus glaber</i> OX=10181 GN=GW7_12106 PE=3 SV=1  |
| G5BU67     | ADP/ATP translocase 2 OS= <i>Heterocephalus glaber</i> OX=10181 GN=GW7_07398 PE=3 SV=1                                |
| G5BJ63     | Actin, cytoplasmic 2 OS= <i>Heterocephalus glaber</i> OX=10181 GN=GW7_04078 PE=3 SV=1                                 |
| G5C6D8     | Splicing factor, proline-and glutamine-rich OS= <i>Heterocephalus glaber</i> OX=10181 GN=GW7_05389 PE=4 SV=1          |
| G5ARR9     | Tenascin-R OS= <i>Heterocephalus glaber</i> OX=10181 GN=GW7_21557 PE=4 SV=1                                           |
| G5BPP6     | Aconitate hydratase, mitochondrial OS= <i>Heterocephalus glaber</i> OX=10181 GN=GW7_19434 PE=3 SV=1                   |
| G5BI78     | Actin, cytoplasmic 1 OS= <i>Heterocephalus glaber</i> OX=10181 GN=GW7_16883 PE=3 SV=1                                 |
| G5ARA1     | Lamin-A/C OS= <i>Heterocephalus glaber</i> OX=10181 GN=GW7_14290 PE=3 SV=1                                            |
| G5BVP2     | ARF GTPase-activating protein GIT1 OS= <i>Heterocephalus glaber</i> OX=10181 GN=GW7_08203 PE=4 SV=1                   |
| G5B5P2     | Serum albumin (Fragment) OS= <i>Heterocephalus glaber</i> OX=10181 GN=GW7_11087 PE=4 SV=1                             |
| G5AMA4     | Heterogeneous nuclear ribonucleoprotein L OS= <i>Heterocephalus glaber</i> OX=10181 GN=GW7_16706 PE=4 SV=1            |
| G5ANG4     | Calcium-binding mitochondrial carrier protein Aralar1 OS= <i>Heterocephalus glaber</i> OX=10181 GN=SLC25A12 PE=3 SV=1 |
| G5BXS0     | Fructose-bisphosphate aldolase OS= <i>Heterocephalus glaber</i> OX=10181 GN=GW7_19061 PE=3 SV=1                       |
| G5BJV3     | Alpha-1,4 glucan phosphorylase OS= <i>Heterocephalus glaber</i> OX=10181 GN=GW7_03733 PE=3 SV=1                       |
| G5AST8     | Homer protein-like protein 1 (Fragment) OS= <i>Heterocephalus glaber</i> OX=10181 GN=GW7_06603 PE=4 SV=1              |
| G5BUP0     | Transketolase OS= <i>Heterocephalus glaber</i> OX=10181 GN=GW7_01625 PE=4 SV=1                                        |
| G5ARE5     | Vacuolar proton pump subunit B OS= <i>Heterocephalus glaber</i> OX=10181 GN=GW7_01073 PE=3 SV=1                       |
| G5BKE5     | Tubulin beta chain OS= <i>Heterocephalus glaber</i> OX=10181 GN=GW7_11747 PE=3 SV=1                                   |

|               |                                                                                                                                            |
|---------------|--------------------------------------------------------------------------------------------------------------------------------------------|
| <b>G5BTH0</b> | Dihydropyrimidinase-related protein 3 OS=Heterocephalus glaber OX=10181 GN=DPYSL3 PE=4 SV=1                                                |
| <b>G5AMM5</b> | LanC-like protein 2 OS=Heterocephalus glaber OX=10181 GN=GW7_07012 PE=4 SV=1                                                               |
| <b>G5BGJ6</b> | Contactin-1 OS=Heterocephalus glaber OX=10181 GN=GW7_19026 PE=4 SV=1                                                                       |
| <b>G5AKA3</b> | L-lactate dehydrogenase OS=Heterocephalus glaber OX=10181 GN=GW7_11628 PE=2 SV=1                                                           |
| <b>G5B8Q7</b> | AP-2 complex subunit alpha OS=Heterocephalus glaber OX=10181 GN=GW7_15304 PE=3 SV=1                                                        |
| <b>G5BD04</b> | Heat shock-related 70 kDa protein 2 OS=Heterocephalus glaber OX=10181 GN=GW7_17513 PE=3 SV=1                                               |
| <b>G5BKE6</b> | Tubulin beta chain OS=Heterocephalus glaber OX=10181 GN=GW7_11748 PE=3 SV=1                                                                |
| <b>G5BNN8</b> | Heat shock cognate protein HSP 90-beta OS=Heterocephalus glaber OX=10181 GN=GW7_19161 PE=3 SV=1                                            |
| <b>G5BTG2</b> | Putative ATP-dependent RNA helicase DHX30 (Fragment) OS=Heterocephalus glaber OX=10181 GN=GW7_17258 PE=4 SV=1                              |
| <b>G5BXB9</b> | Transitional endoplasmic reticulum ATPase (Fragment) OS=Heterocephalus glaber OX=10181 GN=GW7_03434 PE=3 SV=1                              |
| <b>G5BXH3</b> | Putative proline--tRNA ligase, mitochondrial OS=Heterocephalus glaber OX=10181 GN=PARS2 PE=4 SV=1                                          |
| <b>G5B139</b> | Amino acid transporter OS=Heterocephalus glaber OX=10181 GN=GW7_01386 PE=3 SV=1                                                            |
| <b>G5ATH6</b> | Guanine nucleotide-binding protein G(I)/G(S)/G(T) subunit beta-1 OS=Heterocephalus glaber OX=10181 GN=GNB1 PE=4 SV=1                       |
| <b>G5AXZ3</b> | 2-oxoglutarate dehydrogenase E1 component-like, mitochondrial OS=Heterocephalus glaber OX=10181 GN=GW7_10398 PE=4 SV=1                     |
| <b>G5BM52</b> | Creatine kinase U-type, mitochondrial OS=Heterocephalus glaber OX=10181 GN=GW7_18774 PE=3 SV=1                                             |
| <b>G5B750</b> | AP complex subunit beta OS=Heterocephalus glaber OX=10181 GN=GW7_18272 PE=3 SV=1                                                           |
| <b>G5B2W9</b> | ADP/ATP translocase 1 OS=Heterocephalus glaber OX=10181 GN=GW7_12487 PE=3 SV=1                                                             |
| <b>G5B318</b> | Dihydropyrimidinase-related protein 1 (Fragment) OS=Heterocephalus glaber OX=10181 GN=GW7_14551 PE=4 SV=1                                  |
| <b>G5BSI9</b> | Calcium-transporting ATPase OS=Heterocephalus glaber OX=10181 GN=GW7_13643 PE=3 SV=1                                                       |
| <b>G5BS33</b> | Hemoglobin subunit beta OS=Heterocephalus glaber OX=10181 GN=GW7_03824 PE=3 SV=1                                                           |
| <b>G5BMY6</b> | Vesicle-fusing ATPase (Fragment) OS=Heterocephalus glaber OX=10181 GN=GW7_07669 PE=4 SV=1                                                  |
| <b>G5C4F1</b> | Tubulin beta chain OS=Heterocephalus glaber OX=10181 GN=GW7_15271 PE=3 SV=1                                                                |
| <b>G5AL32</b> | V-type proton ATPase catalytic subunit A OS=Heterocephalus glaber OX=10181 GN=GW7_03605 PE=3 SV=1                                          |
| <b>G5APJ0</b> | Synapsin-2 OS=Heterocephalus glaber OX=10181 GN=GW7_10966 PE=4 SV=1                                                                        |
| <b>G5ASD2</b> | Leucine-rich repeat-containing protein 8A OS=Heterocephalus glaber OX=10181 GN=LRR8A PE=4 SV=1                                             |
| <b>G5C9J0</b> | Synaptotagmin-1 OS=Heterocephalus glaber OX=10181 GN=GW7_11734 PE=4 SV=1                                                                   |
| <b>G5BE32</b> | Putative pre-mRNA-splicing factor ATP-dependent RNA helicase DHX15 OS=Heterocephalus glaber OX=10181 GN=DHX15 PE=4 SV=1                    |
| <b>G5BV89</b> | Cytochrome b-c1 complex subunit 2, mitochondrial OS=Heterocephalus glaber OX=10181 GN=UQCRC2 PE=3 SV=1                                     |
| <b>G5C3C3</b> | Tubulin beta chain OS=Heterocephalus glaber OX=10181 GN=GW7_04753 PE=3 SV=1                                                                |
| <b>G5AZ41</b> | Rho guanine nucleotide exchange factor 7 OS=Heterocephalus glaber OX=10181 GN=GW7_00283 PE=4 SV=1                                          |
| <b>G5B212</b> | Microtubule-associated protein 1B OS=Heterocephalus glaber OX=10181 GN=GW7_19015 PE=4 SV=1                                                 |
| <b>G5C6E3</b> | Neurochondrin (Fragment) OS=Heterocephalus glaber OX=10181 GN=GW7_05394 PE=4 SV=1                                                          |
| <b>G5BW99</b> | Mitochondrial 2-oxoglutarate/malate carrier protein isoform 2 OS=Heterocephalus glaber OX=10181 GN=SLC25A11 PE=3 SV=1                      |
| <b>G5B1L2</b> | Band 4.1-like protein 3 OS=Heterocephalus glaber OX=10181 GN=GW7_17835 PE=4 SV=1                                                           |
| <b>G5BBZ6</b> | Guanine nucleotide-binding protein G(I)/G(S)/G(T) subunit beta-2 OS=Heterocephalus glaber OX=10181 GN=GNB2 PE=4 SV=1                       |
| <b>G5ALS1</b> | Keratin, type II cytoskeletal 6B OS=Heterocephalus glaber OX=10181 GN=GW7_03778 PE=3 SV=1                                                  |
| <b>G5B3C5</b> | Serine/threonine-protein phosphatase 2A 65 kDa regulatory subunit A alpha isoform OS=Heterocephalus glaber OX=10181 GN=GW7_06227 PE=4 SV=1 |
| <b>G5C5M0</b> | NADH-ubiquinone oxidoreductase 75 kDa subunit, mitochondrial OS=Heterocephalus glaber OX=10181 GN=GW7_17583 PE=3 SV=1                      |
| <b>G5AVJ8</b> | Nck-associated protein 1 (Fragment) OS=Heterocephalus glaber OX=10181 GN=GW7_12399 PE=4 SV=1                                               |
| <b>G5AMR7</b> | Protein ERGIC-53 OS=Heterocephalus glaber OX=10181 GN=GW7_20044 PE=4 SV=1                                                                  |
| <b>G5BXY1</b> | Hemoglobin subunit alpha OS=Heterocephalus glaber OX=10181 GN=HBA2 PE=3 SV=1                                                               |
| <b>G5BEG2</b> | L-lactate dehydrogenase OS=Heterocephalus glaber OX=10181 GN=GW7_05659 PE=2 SV=1                                                           |
| <b>G5BAX8</b> | Septin-7 OS=Heterocephalus glaber OX=10181 GN=GW7_00168 PE=3 SV=1                                                                          |
| <b>G5BVH5</b> | Fructose-bisphosphate aldolase OS=Heterocephalus glaber OX=10181 GN=GW7_08177 PE=3 SV=1                                                    |
| <b>G5BYJ8</b> | Hemoglobin subunit beta OS=Heterocephalus glaber OX=10181 GN=GW7_14163 PE=3 SV=1                                                           |
| <b>G5B0L2</b> | 2',3'-cyclic-nucleotide 3'-phosphodiesterase (Fragment) OS=Heterocephalus glaber OX=10181 GN=GW7_06865 PE=4 SV=1                           |
| <b>G5C8F7</b> | AP-2 complex subunit alpha OS=Heterocephalus glaber OX=10181 GN=GW7_12697 PE=3 SV=1                                                        |

|        |                                                                                                                                                                     |
|--------|---------------------------------------------------------------------------------------------------------------------------------------------------------------------|
| G5B6V7 | 78 kDa glucose-regulated protein OS=Heterocephalus glaber OX=10181 GN=HSPA5 PE=3 SV=1                                                                               |
| G5C4U7 | Aspartate aminotransferase OS=Heterocephalus glaber OX=10181 GN=GOT1 PE=4 SV=1                                                                                      |
| G5B0M6 | Keratin, type I cytoskeletal 14 OS=Heterocephalus glaber OX=10181 GN=GW7_06879 PE=3 SV=1                                                                            |
| G5AZ30 | Endoplasmic reticulum resident protein 44 OS=Heterocephalus glaber OX=10181 GN=ERP44 PE=4 SV=1                                                                      |
| G5C1Q0 | Splicing factor 3B subunit 3 OS=Heterocephalus glaber OX=10181 GN=GW7_01482 PE=4 SV=1                                                                               |
| G5BMD6 | Ankyrin-2 (Fragment) OS=Heterocephalus glaber OX=10181 GN=GW7_01307 PE=4 SV=1                                                                                       |
| G5ATM3 | ERC protein 2 OS=Heterocephalus glaber OX=10181 GN=GW7_00199 PE=4 SV=1                                                                                              |
| G5BWZ4 | Spectrin beta chain OS=Heterocephalus glaber OX=10181 GN=GW7_07212 PE=3 SV=1                                                                                        |
| G5BG62 | Malate dehydrogenase OS=Heterocephalus glaber OX=10181 GN=GW7_08880 PE=3 SV=1                                                                                       |
| G5B4D4 | Ras-related protein Rab-3A OS=Heterocephalus glaber OX=10181 GN=RAB3A PE=4 SV=1                                                                                     |
| G5AZF9 | Ubiquitin-like modifier-activating enzyme 1 OS=Heterocephalus glaber OX=10181 GN=GW7_11282 PE=3 SV=1                                                                |
| G5BMR4 | Guanine nucleotide-binding protein G(O) subunit alpha (Fragment) OS=Heterocephalus glaber OX=10181 GN=GW7_09344 PE=4 SV=1                                           |
| G5C7R8 | Constitutive coactivator of peroxisome proliferator-activated receptor gamma OS=Heterocephalus glaber OX=10181 GN=GW7_11305 PE=4 SV=1                               |
| G5C3R7 | Septin-2 OS=Heterocephalus glaber OX=10181 GN=GW7_11070 PE=3 SV=1                                                                                                   |
| G5AKB7 | Anion exchange protein OS=Heterocephalus glaber OX=10181 GN=GW7_07691 PE=3 SV=1                                                                                     |
| G5C1L8 | Dihydrolipoylysine-residue succinyltransferase component of 2-oxoglutarate dehydrogenase complex, mitochondrial OS=Heterocephalus glaber OX=10181 GN=DLST PE=4 SV=1 |
| G5AXH0 | Actin, gamma-enteric smooth muscle OS=Heterocephalus glaber OX=10181 GN=GW7_02888 PE=3 SV=1                                                                         |
| G5B577 | Acylglycerol kinase, mitochondrial OS=Heterocephalus glaber OX=10181 GN=GW7_11853 PE=4 SV=1                                                                         |
| G5AP01 | 14-3-3 protein zeta/delta OS=Heterocephalus glaber OX=10181 GN=GW7_00766 PE=3 SV=1                                                                                  |
| G5CAA4 | Isocitrate dehydrogenase [NADP] OS=Heterocephalus glaber OX=10181 GN=GW7_08829 PE=3 SV=1                                                                            |
| G5BGB3 | Cullin-associated NEDD8-dissociated protein 1 OS=Heterocephalus glaber OX=10181 GN=CAND1 PE=4 SV=1                                                                  |
| G5B360 | Calcium-transporting ATPase OS=Heterocephalus glaber OX=10181 GN=GW7_12839 PE=3 SV=1                                                                                |
| G5BWB9 | ATP-dependent 6-phosphofructokinase OS=Heterocephalus glaber OX=10181 GN=GW7_07004 PE=3 SV=1                                                                        |
| G5B6D0 | Glutamine synthetase OS=Heterocephalus glaber OX=10181 GN=GW7_08254 PE=3 SV=1                                                                                       |
| G5B2A3 | Protein kinase C-binding protein NELL2 OS=Heterocephalus glaber OX=10181 GN=GW7_03965 PE=4 SV=1                                                                     |
| G5B7T4 | Kinesin heavy chain isoform 5C OS=Heterocephalus glaber OX=10181 GN=GW7_17996 PE=3 SV=1                                                                             |
| G5BTE1 | AP-2 complex subunit mu-1 OS=Heterocephalus glaber OX=10181 GN=GW7_17237 PE=3 SV=1                                                                                  |
| G5BLU3 | DnaJ-like protein subfamily C member 10 (Fragment) OS=Heterocephalus glaber OX=10181 GN=GW7_10932 PE=4 SV=1                                                         |
| G5C394 | Calcium/calmodulin-dependent protein kinase type II alpha chain OS=Heterocephalus glaber OX=10181 GN=GW7_00118 PE=4 SV=1                                            |
| G5C8G6 | Mitochondrial glutamate carrier 1 OS=Heterocephalus glaber OX=10181 GN=GW7_12706 PE=3 SV=1                                                                          |
| G5BU71 | Septin-6 OS=Heterocephalus glaber OX=10181 GN=GW7_07402 PE=3 SV=1                                                                                                   |
| G5C9G0 | Amino acid transporter OS=Heterocephalus glaber OX=10181 GN=GW7_08002 PE=3 SV=1                                                                                     |
| G5ALS3 | Keratin, type II cytoskeletal 5 OS=Heterocephalus glaber OX=10181 GN=GW7_03780 PE=3 SV=1                                                                            |
| G5BZS4 | Actin, alpha cardiac muscle 1 OS=Heterocephalus glaber OX=10181 GN=GW7_14263 PE=3 SV=1                                                                              |
| G5C0R6 | Dipeptidyl peptidase 9 OS=Heterocephalus glaber OX=10181 GN=GW7_20503 PE=3 SV=1                                                                                     |
| G5BUK7 | Pyruvate dehydrogenase E1 component subunit beta OS=Heterocephalus glaber OX=10181 GN=PDHB PE=4 SV=1                                                                |
| G5BLD9 | Myelin proteolipid protein (Fragment) OS=Heterocephalus glaber OX=10181 GN=GW7_06253 PE=4 SV=1                                                                      |
| G5B2K8 | Phosphate carrier protein, mitochondrial OS=Heterocephalus glaber OX=10181 GN=GW7_08592 PE=3 SV=1                                                                   |
| G5BHP2 | E3 ubiquitin-protein ligase CBL (Fragment) OS=Heterocephalus glaber OX=10181 GN=GW7_18686 PE=4 SV=1                                                                 |
| G5B251 | Heat shock cognate 71 kDa protein OS=Heterocephalus glaber OX=10181 GN=GW7_09579 PE=3 SV=1                                                                          |
| G5B6P0 | Alpha-1,4 glucan phosphorylase OS=Heterocephalus glaber OX=10181 GN=GW7_20662 PE=3 SV=1                                                                             |
| G5BI79 | Fascin OS=Heterocephalus glaber OX=10181 GN=GW7_16884 PE=4 SV=1                                                                                                     |
| G5C2C4 | Neuronal cell adhesion molecule (Fragment) OS=Heterocephalus glaber OX=10181 GN=GW7_15852 PE=4 SV=1                                                                 |
| G5C7M9 | Dynamin-3 (Fragment) OS=Heterocephalus glaber OX=10181 GN=GW7_06265 PE=3 SV=1                                                                                       |
| G5AVL7 | Cytochrome b-c1 complex subunit 1, mitochondrial OS=Heterocephalus glaber OX=10181 GN=UQCRC1 PE=4 SV=1                                                              |
| G5BH24 | Synaptic vesicle glycoprotein 2A OS=Heterocephalus glaber OX=10181 GN=SV2A PE=4 SV=1                                                                                |
| G5BY30 | Aminopeptidase OS=Heterocephalus glaber OX=10181 GN=GW7_00454 PE=3 SV=1                                                                                             |
| G5B6T3 | ATP-dependent 6-phosphofructokinase OS=Heterocephalus glaber OX=10181 GN=GW7_21506 PE=3 SV=1                                                                        |
| G5BE96 | Synaptojanin-1 (Fragment) OS=Heterocephalus glaber OX=10181 GN=GW7_08747 PE=4 SV=1                                                                                  |

|               |                                                                                                                                   |
|---------------|-----------------------------------------------------------------------------------------------------------------------------------|
| <b>G5BKW4</b> | Paraspeckle component 1 OS=Heterocephalus glaber OX=10181 GN=GW7_03914 PE=4 SV=1                                                  |
| <b>G5C5T9</b> | Cytochrome c1, heme protein, mitochondrial OS=Heterocephalus glaber OX=10181 GN=GW7_19247 PE=4 SV=1                               |
| <b>G5BA48</b> | Stress-70 protein, mitochondrial OS=Heterocephalus glaber OX=10181 GN=GW7_10091 PE=3 SV=1                                         |
| <b>G5AXS2</b> | Ras-related protein Rab-14 OS=Heterocephalus glaber OX=10181 GN=RAB14 PE=4 SV=1                                                   |
| <b>G5AMB0</b> | Alpha-actinin-4 OS=Heterocephalus glaber OX=10181 GN=GW7_16712 PE=4 SV=1                                                          |
| <b>G5BKG1</b> | Mitogen-activated protein kinase OS=Heterocephalus glaber OX=10181 GN=GW7_15351 PE=4 SV=1                                         |
| <b>G5AKU7</b> | Aldehyde dehydrogenase, mitochondrial isoform 1 OS=Heterocephalus glaber OX=10181 GN=ALDH2 PE=3 SV=1                              |
| <b>G5CAF3</b> | Sideroflexin-3 OS=Heterocephalus glaber OX=10181 GN=GW7_15882 PE=4 SV=1                                                           |
| <b>G5B840</b> | Band 4.1-like protein 1 OS=Heterocephalus glaber OX=10181 GN=GW7_21265 PE=4 SV=1                                                  |
| <b>G5C7U4</b> | T-complex protein 1 subunit beta OS=Heterocephalus glaber OX=10181 GN=GW7_11343 PE=3 SV=1                                         |
| <b>G5BT87</b> | Histidine-rich glycoprotein OS=Heterocephalus glaber OX=10181 GN=GW7_17202 PE=4 SV=1                                              |
| <b>G5C8M3</b> | Malate dehydrogenase OS=Heterocephalus glaber OX=10181 GN=GW7_04884 PE=3 SV=1                                                     |
| <b>G5BLR5</b> | Fructose-bisphosphate aldolase A OS=Heterocephalus glaber OX=10181 GN=GW7_10395 PE=4 SV=1                                         |
| <b>G5CAZ8</b> | Acetyltransferase component of pyruvate dehydrogenase complex OS=Heterocephalus glaber OX=10181 GN=DLAT PE=3 SV=1                 |
| <b>G5CB51</b> | Sodium/potassium-transporting ATPase subunit beta OS=Heterocephalus glaber OX=10181 GN=GW7_09541 PE=3 SV=1                        |
| <b>G5C530</b> | 6-phosphogluconate dehydrogenase, decarboxylating OS=Heterocephalus glaber OX=10181 GN=GW7_09120 PE=3 SV=1                        |
| <b>G5B0M4</b> | Keratin, type I cytoskeletal 17 OS=Heterocephalus glaber OX=10181 GN=GW7_06877 PE=3 SV=1                                          |
| <b>G5BN06</b> | Heat shock 70 kDa protein 4 OS=Heterocephalus glaber OX=10181 GN=HSPA4 PE=3 SV=1                                                  |
| <b>G5CAR8</b> | Gamma-enolase OS=Heterocephalus glaber OX=10181 GN=GW7_12127 PE=2 SV=1                                                            |
| <b>G5BUH8</b> | Dynamin-2 OS=Heterocephalus glaber OX=10181 GN=GW7_13280 PE=3 SV=1                                                                |
| <b>G5BJQ1</b> | Septin-11 OS=Heterocephalus glaber OX=10181 GN=GW7_19874 PE=3 SV=1                                                                |
| <b>G5BY58</b> | NADH dehydrogenase (Ubiquinone) 1 beta subcomplex subunit 10 OS=Heterocephalus glaber OX=10181 GN=NDUFB10 PE=4 SV=1               |
| <b>G5BX71</b> | Calcium-transporting ATPase OS=Heterocephalus glaber OX=10181 GN=GW7_19471 PE=3 SV=1                                              |
| <b>G5ASS3</b> | T-complex protein 1 subunit zeta isoform a OS=Heterocephalus glaber OX=10181 GN=CCT6A PE=3 SV=1                                   |
| <b>G5B4U5</b> | Uncharacterized protein OS=Heterocephalus glaber OX=10181 GN=GW7_03212 PE=4 SV=1                                                  |
| <b>G5C7W9</b> | Alpha-actinin-1 OS=Heterocephalus glaber OX=10181 GN=GW7_03701 PE=4 SV=1                                                          |
| <b>G5BFK9</b> | Rab GDP dissociation inhibitor OS=Heterocephalus glaber OX=10181 GN=GW7_19328 PE=3 SV=1                                           |
| <b>G5B5F3</b> | Vesicle-associated membrane protein 2 (Fragment) OS=Heterocephalus glaber OX=10181 GN=GW7_13855 PE=4 SV=1                         |
| <b>G5BVL3</b> | 14-3-3 protein epsilon OS=Heterocephalus glaber OX=10181 GN=GW7_08232 PE=3 SV=1                                                   |
| <b>G5CAX4</b> | Heat shock cognate 71 kDa protein OS=Heterocephalus glaber OX=10181 GN=GW7_21369 PE=3 SV=1                                        |
| <b>G5AKS9</b> | Nitric oxide synthase, brain OS=Heterocephalus glaber OX=10181 GN=GW7_10175 PE=4 SV=1                                             |
| <b>G5BN09</b> | Voltage-dependent anion-selective channel protein 1 OS=Heterocephalus glaber OX=10181 GN=VDAC1 PE=4 SV=1                          |
| <b>G5AP69</b> | Serine/threonine-protein phosphatase (Fragment) OS=Heterocephalus glaber OX=10181 GN=GW7_10360 PE=3 SV=1                          |
| <b>G5BW11</b> | Ras-related protein Rab-1B OS=Heterocephalus glaber OX=10181 GN=RAB1B PE=4 SV=1                                                   |
| <b>G5CAS2</b> | Prohibitin-2 OS=Heterocephalus glaber OX=10181 GN=GW7_12131 PE=4 SV=1                                                             |
| <b>G5BTW5</b> | NADH dehydrogenase [ubiquinone] flavoprotein 1, mitochondrial OS=Heterocephalus glaber OX=10181 GN=NDUFV1 PE=3 SV=1               |
| <b>G5ARM9</b> | Heterogeneous nuclear ribonucleoprotein K OS=Heterocephalus glaber OX=10181 GN=HNRNPK PE=4 SV=1                                   |
| <b>G5BHY3</b> | PITH domain-containing protein (Fragment) OS=Heterocephalus glaber OX=10181 GN=GW7_07493 PE=4 SV=1                                |
| <b>G5B230</b> | Intercellular adhesion molecule 5 OS=Heterocephalus glaber OX=10181 GN=GW7_08246 PE=4 SV=1                                        |
| <b>G5C1Y4</b> | T-complex protein 1 subunit delta OS=Heterocephalus glaber OX=10181 GN=GW7_01322 PE=3 SV=1                                        |
| <b>G5B2V7</b> | 60 kDa heat shock protein, mitochondrial OS=Heterocephalus glaber OX=10181 GN=GW7_17339 PE=4 SV=1                                 |
| <b>G5C773</b> | Band 4.1-like protein 2 OS=Heterocephalus glaber OX=10181 GN=GW7_21858 PE=4 SV=1                                                  |
| <b>G5ARZ9</b> | NADH dehydrogenase (Ubiquinone) 1 alpha subcomplex subunit 9, mitochondrial OS=Heterocephalus glaber OX=10181 GN=NDUFA9 PE=4 SV=1 |
| <b>G5AKJ4</b> | Aspartyl aminopeptidase OS=Heterocephalus glaber OX=10181 GN=DNPEP PE=3 SV=1                                                      |
| <b>G5BSN0</b> | Dedicator of cytokinesis protein 8 OS=Heterocephalus glaber OX=10181 GN=GW7_01505 PE=3 SV=1                                       |
| <b>G5BSI1</b> | Dynamin-1-like protein OS=Heterocephalus glaber OX=10181 GN=GW7_21637 PE=3 SV=1                                                   |
| <b>G5AU37</b> | ADP-ribosylation factor 3 OS=Heterocephalus glaber OX=10181 GN=GW7_14469 PE=3 SV=1                                                |



|               |                                                                                                                               |
|---------------|-------------------------------------------------------------------------------------------------------------------------------|
| <b>G5C0K7</b> | Myelin basic protein OS=Heterocephalus glaber OX=10181 GN=GW7_03536 PE=4 SV=1                                                 |
| <b>G5AW57</b> | Aspartate aminotransferase OS=Heterocephalus glaber OX=10181 GN=GOT2 PE=4 SV=1                                                |
| <b>G5AZH3</b> | Cytoplasmic FMR1-interacting protein 1 (Fragment) OS=Heterocephalus glaber OX=10181 GN=GW7_18826 PE=4 SV=1                    |
| <b>G5ALK7</b> | Elongation factor 1-alpha OS=Heterocephalus glaber OX=10181 GN=GW7_12808 PE=3 SV=1                                            |
| <b>G5BAY8</b> | Lysine-specific demethylase 5C OS=Heterocephalus glaber OX=10181 GN=GW7_04947 PE=4 SV=1                                       |
| <b>G5AKF3</b> | Myelin-oligodendrocyte glycoprotein (Fragment) OS=Heterocephalus glaber OX=10181 GN=GW7_10279 PE=4 SV=1                       |
| <b>G5BF93</b> | Trimethyllysine dioxygenase, mitochondrial OS=Heterocephalus glaber OX=10181 GN=GW7_10776 PE=4 SV=1                           |
| <b>G5B3J1</b> | Rab GDP dissociation inhibitor (Fragment) OS=Heterocephalus glaber OX=10181 GN=GW7_02321 PE=3 SV=1                            |
| <b>G5C8D3</b> | Elongation factor 1-alpha (Fragment) OS=Heterocephalus glaber OX=10181 GN=GW7_09733 PE=3 SV=1                                 |
| <b>G5BEX6</b> | Neural cell adhesion molecule 1 OS=Heterocephalus glaber OX=10181 GN=GW7_02493 PE=4 SV=1                                      |
| <b>G5BQX0</b> | AMP deaminase OS=Heterocephalus glaber OX=10181 GN=GW7_20134 PE=3 SV=1                                                        |
| <b>G5C5Q2</b> | ELKS/RAB6-interacting/CAST family member 1 OS=Heterocephalus glaber OX=10181 GN=GW7_19210 PE=4 SV=1                           |
| <b>G5AZ97</b> | Triple functional domain protein OS=Heterocephalus glaber OX=10181 GN=GW7_01985 PE=4 SV=1                                     |
| <b>G5AXV6</b> | ATP synthase subunit gamma OS=Heterocephalus glaber OX=10181 GN=GW7_14036 PE=3 SV=1                                           |
| <b>G5ALD6</b> | D-beta-hydroxybutyrate dehydrogenase, mitochondrial OS=Heterocephalus glaber OX=10181 GN=BDH1 PE=3 SV=1                       |
| <b>G5AQD6</b> | 3,2-trans-enoyl-CoA isomerase, mitochondrial OS=Heterocephalus glaber OX=10181 GN=GW7_05021 PE=3 SV=1                         |
| <b>G5APX0</b> | AP complex subunit beta OS=Heterocephalus glaber OX=10181 GN=GW7_05313 PE=3 SV=1                                              |
| <b>G5BQX2</b> | Glutathione S-transferase OS=Heterocephalus glaber OX=10181 GN=GW7_20136 PE=3 SV=1                                            |
| <b>G5BKX2</b> | Cytoplasmic FMR1-interacting protein 2 OS=Heterocephalus glaber OX=10181 GN=GW7_12158 PE=4 SV=1                               |
| <b>G5B6W0</b> | Protein SCAI OS=Heterocephalus glaber OX=10181 GN=GW7_01139 PE=4 SV=1                                                         |
| <b>G5BG59</b> | 14-3-3 protein gamma (Fragment) OS=Heterocephalus glaber OX=10181 GN=GW7_08877 PE=3 SV=1                                      |
| <b>G5CBK9</b> | Ras-related protein Rab-10 OS=Heterocephalus glaber OX=10181 GN=GW7_17041 PE=4 SV=1                                           |
| <b>G5CA17</b> | Septin-5 (Fragment) OS=Heterocephalus glaber OX=10181 GN=GW7_11135 PE=3 SV=1                                                  |
| <b>G5B928</b> | Calcium-transporting ATPase OS=Heterocephalus glaber OX=10181 GN=GW7_14600 PE=3 SV=1                                          |
| <b>G5B9Q5</b> | Zinc transporter ZIP14 (Fragment) OS=Heterocephalus glaber OX=10181 GN=GW7_20731 PE=4 SV=1                                    |
| <b>G5BBV6</b> | 14-3-3 protein eta OS=Heterocephalus glaber OX=10181 GN=GW7_17673 PE=3 SV=1                                                   |
| <b>G5BXQ6</b> | Neurofascin OS=Heterocephalus glaber OX=10181 GN=GW7_15814 PE=4 SV=1                                                          |
| <b>G5C4P1</b> | Prohibitin OS=Heterocephalus glaber OX=10181 GN=GW7_21759 PE=4 SV=1                                                           |
| <b>G5BCQ6</b> | Transcriptional activator protein Pur-alpha OS=Heterocephalus glaber OX=10181 GN=GW7_08872 PE=4 SV=1                          |
| <b>G5BXR0</b> | Acetyl-CoA acetyltransferase, mitochondrial OS=Heterocephalus glaber OX=10181 GN=GW7_19747 PE=3 SV=1                          |
| <b>G5AMP1</b> | ADP/ATP translocase 3 OS=Heterocephalus glaber OX=10181 GN=GW7_12495 PE=3 SV=1                                                |
| <b>G5ALU1</b> | Regulating synaptic membrane exocytosis protein 1 OS=Heterocephalus glaber OX=10181 GN=GW7_17598 PE=4 SV=1                    |
| <b>G5BBP4</b> | EF-hand calcium-binding protein 1 OS=Heterocephalus glaber OX=10181 GN=GW7_09364 PE=4 SV=1                                    |
| <b>G5C2C6</b> | Dihydrolipoyl dehydrogenase OS=Heterocephalus glaber OX=10181 GN=DLD PE=3 SV=1                                                |
| <b>G5B0J8</b> | V-type proton ATPase subunit a OS=Heterocephalus glaber OX=10181 GN=GW7_06851 PE=3 SV=1                                       |
| <b>G5ALX2</b> | Catenin beta-1 OS=Heterocephalus glaber OX=10181 GN=GW7_09171 PE=4 SV=1                                                       |
| <b>G5BJ39</b> | Keratin, type II cytoskeletal 8 OS=Heterocephalus glaber OX=10181 GN=GW7_10816 PE=2 SV=1                                      |
| <b>G5AWZ4</b> | Coronin OS=Heterocephalus glaber OX=10181 GN=GW7_02143 PE=3 SV=1                                                              |
| <b>G5C9N9</b> | Myotubularin (Fragment) OS=Heterocephalus glaber OX=10181 GN=GW7_05283 PE=4 SV=1                                              |
| <b>G5BI06</b> | Basement membrane-specific heparan sulfate proteoglycan core protein OS=Heterocephalus glaber OX=10181 GN=GW7_07516 PE=4 SV=1 |
| <b>G5BDV3</b> | Rap1 GTPase-GDP dissociation stimulator 1 (Fragment) OS=Heterocephalus glaber OX=10181 GN=GW7_10113 PE=4 SV=1                 |
| <b>G5AM26</b> | ATP synthase subunit O, mitochondrial OS=Heterocephalus glaber OX=10181 GN=GW7_16287 PE=3 SV=1                                |
| <b>G5BZ40</b> | Pyruvate dehydrogenase E1 component subunit alpha OS=Heterocephalus glaber OX=10181 GN=GW7_01970 PE=4 SV=1                    |
| <b>G5BN93</b> | Synaptic vesicle membrane protein VAT-1-like protein OS=Heterocephalus glaber OX=10181 GN=GW7_07847 PE=4 SV=1                 |
| <b>G5CAR5</b> | Triosephosphate isomerase OS=Heterocephalus glaber OX=10181 GN=GW7_12124 PE=3 SV=1                                            |

|               |                                                                                                                            |
|---------------|----------------------------------------------------------------------------------------------------------------------------|
| <b>G5BZY6</b> | Guanine nucleotide-binding protein G(I), alpha-2 subunit OS=Heterocephalus glaber OX=10181 GN=GW7_19941 PE=4 SV=1          |
| <b>G5C3N6</b> | Vacuolar protein sorting-associated protein 35 OS=Heterocephalus glaber OX=10181 GN=GW7_08700 PE=3 SV=1                    |
| <b>G5AKP8</b> | Phosphatidylinositol-4-phosphate 5-kinase type-1 gamma (Fragment) OS=Heterocephalus glaber OX=10181 GN=GW7_11309 PE=4 SV=1 |
| <b>G5B2P2</b> | Heat shock protein 105 kDa OS=Heterocephalus glaber OX=10181 GN=GW7_02038 PE=3 SV=1                                        |
| <b>G5B3I7</b> | Ras-related protein Rab-5A OS=Heterocephalus glaber OX=10181 GN=RAB5A PE=4 SV=1                                            |
| <b>G5BIL1</b> | 2-oxoglutarate dehydrogenase E1 component, mitochondrial OS=Heterocephalus glaber OX=10181 GN=GW7_08272 PE=4 SV=1          |
| <b>G5AZR4</b> | Platelet-activating factor acetylhydrolase IB subunit gamma OS=Heterocephalus glaber OX=10181 GN=PAFAH1B3 PE=4 SV=1        |
| <b>G5B2Y7</b> | WD repeat-containing protein 1 OS=Heterocephalus glaber OX=10181 GN=GW7_14537 PE=4 SV=1                                    |
| <b>G5AKY4</b> | Heat shock 70 kDa protein 4L OS=Heterocephalus glaber OX=10181 GN=GW7_10899 PE=3 SV=1                                      |
| <b>G5C8M4</b> | UTP--glucose-1-phosphate uridylyltransferase OS=Heterocephalus glaber OX=10181 GN=GW7_04885 PE=3 SV=1                      |
| <b>G5C7J1</b> | Voltage-dependent anion-selective channel protein 2 OS=Heterocephalus glaber OX=10181 GN=GW7_13179 PE=4 SV=1               |
| <b>G5BSD0</b> | 4-aminobutyrate aminotransferase, mitochondrial (Fragment) OS=Heterocephalus glaber OX=10181 GN=GW7_08976 PE=3 SV=1        |
| <b>G5BYD1</b> | Syntaxin-1B OS=Heterocephalus glaber OX=10181 GN=GW7_05131 PE=3 SV=1                                                       |
| <b>G5B1C5</b> | T-complex protein 1 subunit theta OS=Heterocephalus glaber OX=10181 GN=GW7_13214 PE=3 SV=1                                 |
| <b>G5BSN2</b> | Phosphoglucomutase-1 OS=Heterocephalus glaber OX=10181 GN=GW7_01507 PE=4 SV=1                                              |
| <b>G5AR92</b> | T-complex protein 1 subunit gamma (Fragment) OS=Heterocephalus glaber OX=10181 GN=GW7_14281 PE=3 SV=1                      |
| <b>G5CBF1</b> | Protein kinase C gamma type (Fragment) OS=Heterocephalus glaber OX=10181 GN=GW7_20162 PE=3 SV=1                            |
| <b>G5BDP5</b> | Septin-8 OS=Heterocephalus glaber OX=10181 GN=GW7_11423 PE=3 SV=1                                                          |
| <b>G5BCZ6</b> | Ras-related protein Rab-2A OS=Heterocephalus glaber OX=10181 GN=GW7_17505 PE=4 SV=1                                        |
| <b>G5B2F5</b> | Actin, cytoplasmic 1 OS=Heterocephalus glaber OX=10181 GN=GW7_00567 PE=3 SV=1                                              |
| <b>G5BA18</b> | CB1 cannabinoid receptor-interacting protein 1 OS=Heterocephalus glaber OX=10181 GN=GW7_02210 PE=4 SV=1                    |
| <b>G5C2D5</b> | cAMP-dependent protein kinase type II-beta regulatory subunit OS=Heterocephalus glaber OX=10181 GN=PRKAR2B PE=4 SV=1       |
| <b>G5C4L3</b> | Nucleoside diphosphate kinase (Fragment) OS=Heterocephalus glaber OX=10181 GN=GW7_21798 PE=3 SV=1                          |
| <b>G5BAB4</b> | Constitutive coactivator of PPAR-gamma-like protein 2 OS=Heterocephalus glaber OX=10181 GN=GW7_01037 PE=4 SV=1             |
| <b>G5ASQ2</b> | Septin-8 OS=Heterocephalus glaber OX=10181 GN=GW7_12246 PE=3 SV=1                                                          |
| <b>G5BRK8</b> | Importin-7 OS=Heterocephalus glaber OX=10181 GN=GW7_21205 PE=4 SV=1                                                        |
| <b>G5ANV4</b> | Golgin subfamily A member 3 OS=Heterocephalus glaber OX=10181 GN=GW7_09569 PE=4 SV=1                                       |
| <b>G5AM45</b> | Zinc transporter 1 OS=Heterocephalus glaber OX=10181 GN=GW7_16306 PE=4 SV=1                                                |
| <b>G5BJY3</b> | Succinate-semialdehyde dehydrogenase (Fragment) OS=Heterocephalus glaber OX=10181 GN=GW7_06350 PE=3 SV=1                   |
| <b>G5CAI7</b> | Cytosolic purine 5'-nucleotidase OS=Heterocephalus glaber OX=10181 GN=GW7_15916 PE=4 SV=1                                  |
| <b>G5ASH7</b> | Guanine deaminase OS=Heterocephalus glaber OX=10181 GN=GW7_07953 PE=3 SV=1                                                 |
| <b>G5CAH6</b> | Alpha-centractin OS=Heterocephalus glaber OX=10181 GN=ACTR1A PE=3 SV=1                                                     |
| <b>G5ALN8</b> | Heterogeneous nuclear ribonucleoprotein D0 (Fragment) OS=Heterocephalus glaber OX=10181 GN=GW7_10606 PE=4 SV=1             |
| <b>G5BAI1</b> | IQ motif and SEC7 domain-containing protein 1 OS=Heterocephalus glaber OX=10181 GN=GW7_02159 PE=4 SV=1                     |
| <b>G5BB78</b> | Citrate synthase (Fragment) OS=Heterocephalus glaber OX=10181 GN=GW7_15757 PE=3 SV=1                                       |
| <b>G5BJK0</b> | Synaptophysin OS=Heterocephalus glaber OX=10181 GN=GW7_20097 PE=4 SV=1                                                     |
| <b>G5BS94</b> | Glutathione S-transferase P OS=Heterocephalus glaber OX=10181 GN=GW7_14677 PE=3 SV=1                                       |
| <b>G5BZB8</b> | Elongation factor 2 OS=Heterocephalus glaber OX=10181 GN=EEF2 PE=4 SV=1                                                    |
| <b>G5CBQ4</b> | T-complex protein 1 subunit eta OS=Heterocephalus glaber OX=10181 GN=GW7_03296 PE=3 SV=1                                   |
| <b>G5BRD7</b> | Sarcoplasmic/endoplasmic reticulum calcium ATPase 1 OS=Heterocephalus glaber OX=10181 GN=GW7_14894 PE=3 SV=1               |
| <b>G5BFB4</b> | Dihydropyrimidinase-related protein 4 OS=Heterocephalus glaber OX=10181 GN=GW7_14070 PE=4 SV=1                             |
| <b>G5C9Y1</b> | Phospholipase D3 OS=Heterocephalus glaber OX=10181 GN=GW7_03571 PE=4 SV=1                                                  |

|               |                                                                                                                                       |
|---------------|---------------------------------------------------------------------------------------------------------------------------------------|
| <b>G5BCG5</b> | Metabotropic glutamate receptor 4 OS=Heterocephalus glaber OX=10181 GN=GW7_15655 PE=3 SV=1                                            |
| <b>G5B710</b> | T-complex protein 1 subunit epsilon OS=Heterocephalus glaber OX=10181 GN=GW7_03792 PE=3 SV=1                                          |
| <b>G5BPM1</b> | Alpha-2-macroglobulin OS=Heterocephalus glaber OX=10181 GN=GW7_17301 PE=4 SV=1                                                        |
| <b>G5ATL5</b> | Phosphoinositide phospholipase C OS=Heterocephalus glaber OX=10181 GN=GW7_07363 PE=4 SV=1                                             |
| <b>G5B615</b> | V-type proton ATPase subunit H OS=Heterocephalus glaber OX=10181 GN=ATP6V1H PE=3 SV=1                                                 |
| <b>G5BW10</b> | NADH dehydrogenase (Ubiquinone) iron-sulfur protein 2, mitochondrial isoform 1 OS=Heterocephalus glaber OX=10181 GN=NDUFS2 PE=3 SV=1  |
| <b>G5BQX5</b> | Glutathione S-transferase OS=Heterocephalus glaber OX=10181 GN=GW7_20139 PE=3 SV=1                                                    |
| <b>G5BCH1</b> | Alpha-adducin OS=Heterocephalus glaber OX=10181 GN=ADD1 PE=4 SV=1                                                                     |
| <b>G5C4J2</b> | Glyceraldehyde-3-phosphate dehydrogenase OS=Heterocephalus glaber OX=10181 GN=GW7_21777 PE=4 SV=1                                     |
| <b>G5BPB2</b> | NADH dehydrogenase [ubiquinone] iron-sulfur protein 3, mitochondrial OS=Heterocephalus glaber OX=10181 GN=GW7_11265 PE=3 SV=1         |
| <b>G5BD70</b> | Adenosylhomocysteinase OS=Heterocephalus glaber OX=10181 GN=GW7_07805 PE=3 SV=1                                                       |
| <b>G5BH50</b> | Profilin (Fragment) OS=Heterocephalus glaber OX=10181 GN=GW7_12907 PE=3 SV=1                                                          |
| <b>G5BIH8</b> | Protein kinase C OS=Heterocephalus glaber OX=10181 GN=GW7_09221 PE=3 SV=1                                                             |
| <b>G5BZ00</b> | Zinc transporter 3 OS=Heterocephalus glaber OX=10181 GN=GW7_14384 PE=4 SV=1                                                           |
| <b>G5AY28</b> | Synaptotagmin-17 OS=Heterocephalus glaber OX=10181 GN=GW7_06689 PE=4 SV=1                                                             |
| <b>G5BPT7</b> | Adenosylhomocysteinase OS=Heterocephalus glaber OX=10181 GN=AHCY PE=3 SV=1                                                            |
| <b>G5BF97</b> | DNA topoisomerase 2-beta OS=Heterocephalus glaber OX=10181 GN=GW7_15047 PE=4 SV=1                                                     |
| <b>G5AWL7</b> | Serine/threonine-protein phosphatase (Fragment) OS=Heterocephalus glaber OX=10181 GN=GW7_03093 PE=3 SV=1                              |
| <b>G5C1E9</b> | Leucine-rich repeat and calponin-like protein domain-containing protein 1 OS=Heterocephalus glaber OX=10181 GN=GW7_16595 PE=4 SV=1    |
| <b>G5BSE8</b> | Histone H2A OS=Heterocephalus glaber OX=10181 GN=GW7_09999 PE=3 SV=1                                                                  |
| <b>G5BFL5</b> | Glucose-6-phosphate 1-dehydrogenase OS=Heterocephalus glaber OX=10181 GN=GW7_19334 PE=3 SV=1                                          |
| <b>G5ATY3</b> | Anion exchange protein OS=Heterocephalus glaber OX=10181 GN=GW7_14415 PE=3 SV=1                                                       |
| <b>G5BS07</b> | Dipeptidyl aminopeptidase-like protein 6 OS=Heterocephalus glaber OX=10181 GN=GW7_03940 PE=3 SV=1                                     |
| <b>G5AYT2</b> | Putative ATP-dependent RNA helicase DDX17 OS=Heterocephalus glaber OX=10181 GN=GW7_02579 PE=3 SV=1                                    |
| <b>G5BHI4</b> | NADH dehydrogenase [ubiquinone] 1 alpha subcomplex subunit 10, mitochondrial OS=Heterocephalus glaber OX=10181 GN=GW7_08787 PE=3 SV=1 |
| <b>G5C873</b> | Neural cell adhesion molecule 2 OS=Heterocephalus glaber OX=10181 GN=GW7_07725 PE=4 SV=1                                              |
| <b>G5B0L4</b> | ATP-citrate synthase OS=Heterocephalus glaber OX=10181 GN=GW7_06867 PE=3 SV=1                                                         |
| <b>G5CBJ9</b> | Dihydropyrimidinase-related protein 5 OS=Heterocephalus glaber OX=10181 GN=GW7_17031 PE=4 SV=1                                        |
| <b>G5AXT3</b> | Adenylyl cyclase-associated protein OS=Heterocephalus glaber OX=10181 GN=GW7_06940 PE=3 SV=1                                          |
| <b>G5CAD2</b> | Phosphatidylinositol-binding clathrin assembly protein OS=Heterocephalus glaber OX=10181 GN=GW7_14144 PE=4 SV=1                       |
| <b>G5B8C9</b> | OCIA domain-containing protein 2 (Fragment) OS=Heterocephalus glaber OX=10181 GN=GW7_00862 PE=4 SV=1                                  |
| <b>G5BFV5</b> | Heterogeneous nuclear ribonucleoproteins C1/C2 OS=Heterocephalus glaber OX=10181 GN=GW7_08510 PE=4 SV=1                               |
| <b>G5BHY5</b> | 60S ribosomal protein L11 (Fragment) OS=Heterocephalus glaber OX=10181 GN=GW7_07495 PE=3 SV=1                                         |
| <b>G5C289</b> | Microtubule-associated protein RP/EB family member 2 (Fragment) OS=Heterocephalus glaber OX=10181 GN=GW7_13100 PE=4 SV=1              |
| <b>G5C5Z4</b> | Actin-related protein 2 OS=Heterocephalus glaber OX=10181 GN=GW7_18355 PE=3 SV=1                                                      |
| <b>G5B8J0</b> | Noelin (Fragment) OS=Heterocephalus glaber OX=10181 GN=GW7_14332 PE=4 SV=1                                                            |
| <b>G5BH87</b> | Adenosylhomocysteinase (Fragment) OS=Heterocephalus glaber OX=10181 GN=GW7_16791 PE=3 SV=1                                            |
| <b>G5AYJ7</b> | 4F2 cell-surface antigen heavy chain OS=Heterocephalus glaber OX=10181 GN=GW7_01791 PE=4 SV=1                                         |
| <b>G5BF08</b> | Homer protein-like protein 2 OS=Heterocephalus glaber OX=10181 GN=GW7_13593 PE=4 SV=1                                                 |
| <b>G5BUW4</b> | 60S ribosomal protein L27a OS=Heterocephalus glaber OX=10181 GN=RPL27A PE=3 SV=1                                                      |
| <b>G5BM53</b> | Protein disulfide-isomerase OS=Heterocephalus glaber OX=10181 GN=GW7_18775 PE=3 SV=1                                                  |
| <b>G5BVG8</b> | Succinate--CoA ligase [ADP/GDP-forming] subunit alpha, mitochondrial OS=Heterocephalus glaber OX=10181 GN=SUCLG1 PE=3 SV=1            |
| <b>G5AUK3</b> | Proteasome subunit alpha type (Fragment) OS=Heterocephalus glaber OX=10181 GN=GW7_10861 PE=3 SV=1                                     |
| <b>G5BDX2</b> | Proteasome subunit alpha type OS=Heterocephalus glaber OX=10181 GN=PSMA7 PE=3 SV=1                                                    |
| <b>G5ALG5</b> | U2-associated protein SR140 OS=Heterocephalus glaber OX=10181 GN=GW7_01159 PE=4 SV=1                                                  |

|               |                                                                                                                         |
|---------------|-------------------------------------------------------------------------------------------------------------------------|
| <b>G5B521</b> | Malic enzyme (Fragment) OS=Heterocephalus glaber OX=10181 GN=GW7_17644 PE=3 SV=1                                        |
| <b>G5BV28</b> | Histone H3 OS=Heterocephalus glaber OX=10181 GN=GW7_16515 PE=3 SV=1                                                     |
| <b>G5AR38</b> | Endoplasmic (Fragment) OS=Heterocephalus glaber OX=10181 GN=GW7_10317 PE=3 SV=1                                         |
| <b>G5BBE6</b> | CUG-BP-and ETR-3-like factor 2 (Fragment) OS=Heterocephalus glaber OX=10181 GN=GW7_19731 PE=4 SV=1                      |
| <b>G5BQU1</b> | Neural cell adhesion molecule L1 (Fragment) OS=Heterocephalus glaber OX=10181 GN=GW7_02026 PE=4 SV=1                    |
| <b>G5BY03</b> | Neuronal membrane glycoprotein M6-a OS=Heterocephalus glaber OX=10181 GN=GW7_21848 PE=4 SV=1                            |
| <b>G5C0C5</b> | Phosphoglycerate mutase OS=Heterocephalus glaber OX=10181 GN=GW7_09237 PE=3 SV=1                                        |
| <b>G5BIK6</b> | Calcium/calmodulin-dependent protein kinase type II beta chain OS=Heterocephalus glaber OX=10181 GN=GW7_08267 PE=4 SV=1 |
| <b>G5BF40</b> | Ras-related C3 botulinum toxin substrate 1 (Fragment) OS=Heterocephalus glaber OX=10181 GN=GW7_17917 PE=4 SV=1          |
| <b>G5AV13</b> | Sodium/calcium exchanger 2 OS=Heterocephalus glaber OX=10181 GN=GW7_18138 PE=3 SV=1                                     |
| <b>G5BRF2</b> | Neuroplastin OS=Heterocephalus glaber OX=10181 GN=GW7_19526 PE=4 SV=1                                                   |
| <b>G5BY29</b> | Importin subunit beta-1 OS=Heterocephalus glaber OX=10181 GN=GW7_00453 PE=4 SV=1                                        |
| <b>G5ASA2</b> | Ras-related protein Rab-6A OS=Heterocephalus glaber OX=10181 GN=GW7_02105 PE=4 SV=1                                     |
| <b>G5B9Q1</b> | Phytanoyl-CoA hydroxylase-interacting protein OS=Heterocephalus glaber OX=10181 GN=GW7_20727 PE=4 SV=1                  |
| <b>G5B0K5</b> | Ras-related protein Rab-5C OS=Heterocephalus glaber OX=10181 GN=GW7_06858 PE=4 SV=1                                     |
| <b>G5BAV0</b> | Ras-related C3 botulinum toxin substrate 2 OS=Heterocephalus glaber OX=10181 GN=GW7_03672 PE=4 SV=1                     |
| <b>G5CBD1</b> | Beta-soluble NSF attachment protein OS=Heterocephalus glaber OX=10181 GN=GW7_00718 PE=4 SV=1                            |
| <b>G5B6J0</b> | Cofilin-1 OS=Heterocephalus glaber OX=10181 GN=GW7_20612 PE=3 SV=1                                                      |
| <b>G5BPR0</b> | Neuronal-specific septin-3 (Fragment) OS=Heterocephalus glaber OX=10181 GN=GW7_19448 PE=3 SV=1                          |
| <b>G5B8B7</b> | Clathrin coat assembly protein AP180 OS=Heterocephalus glaber OX=10181 GN=GW7_19308 PE=4 SV=1                           |
| <b>G5C3T1</b> | Actin-related protein 3 OS=Heterocephalus glaber OX=10181 GN=GW7_07463 PE=3 SV=1                                        |
| <b>G5BH21</b> | Heterogeneous nuclear ribonucleoprotein R OS=Heterocephalus glaber OX=10181 GN=GW7_07501 PE=4 SV=1                      |
| <b>G5BM50</b> | Microtubule-associated protein 1A OS=Heterocephalus glaber OX=10181 GN=GW7_18772 PE=4 SV=1                              |
| <b>G5BBE2</b> | Glutamate--cysteine ligase catalytic subunit (Fragment) OS=Heterocephalus glaber OX=10181 GN=GW7_06303 PE=4 SV=1        |
| <b>G5B8E6</b> | F-actin-capping protein subunit alpha (Fragment) OS=Heterocephalus glaber OX=10181 GN=GW7_12267 PE=3 SV=1               |
| <b>G5AP97</b> | Protein 4.1 OS=Heterocephalus glaber OX=10181 GN=GW7_07130 PE=4 SV=1                                                    |
| <b>G5BDS2</b> | Cerebellin-3 OS=Heterocephalus glaber OX=10181 GN=GW7_16489 PE=4 SV=1                                                   |
| <b>G5BYI8</b> | Microtubule-associated protein RP/EB family member 3 OS=Heterocephalus glaber OX=10181 GN=MAPRE3 PE=4 SV=1              |
| <b>G5B4V6</b> | Major prion protein OS=Heterocephalus glaber OX=10181 GN=GW7_03223 PE=3 SV=1                                            |
| <b>G5AS68</b> | Phosphodiesterase OS=Heterocephalus glaber OX=10181 GN=GW7_02116 PE=3 SV=1                                              |
| <b>G5AN52</b> | Ras-related protein Rab-11A OS=Heterocephalus glaber OX=10181 GN=RAB11A PE=4 SV=1                                       |
| <b>G5AW15</b> | Vesicle-trafficking protein SEC22b OS=Heterocephalus glaber OX=10181 GN=GW7_13757 PE=3 SV=1                             |
| <b>G5BK72</b> | Creatine kinase S-type, mitochondrial OS=Heterocephalus glaber OX=10181 GN=GW7_10879 PE=3 SV=1                          |
| <b>G5BQA9</b> | Serotransferrin OS=Heterocephalus glaber OX=10181 GN=GW7_05106 PE=3 SV=1                                                |
| <b>G5CA61</b> | Four and a half LIM domains protein 1 OS=Heterocephalus glaber OX=10181 GN=GW7_15573 PE=4 SV=1                          |
| <b>G5AQT3</b> | Septin-9 (Fragment) OS=Heterocephalus glaber OX=10181 GN=GW7_06407 PE=3 SV=1                                            |
| <b>G5C6C2</b> | Nucleoprotein TPR OS=Heterocephalus glaber OX=10181 GN=GW7_07103 PE=4 SV=1                                              |
| <b>G5C6M4</b> | Casein kinase II subunit alpha OS=Heterocephalus glaber OX=10181 GN=GW7_20923 PE=4 SV=1                                 |
| <b>G5BJG1</b> | Cytochrome c oxidase subunit 4 isoform 1, mitochondrial OS=Heterocephalus glaber OX=10181 GN=GW7_12651 PE=4 SV=1        |
| <b>G5BGK6</b> | Glutaminase kidney isoform, mitochondrial (Fragment) OS=Heterocephalus glaber OX=10181 GN=GW7_01412 PE=3 SV=1           |
| <b>G5BMR5</b> | Guanine nucleotide-binding protein G(O) subunit alpha OS=Heterocephalus glaber OX=10181 GN=GW7_09345 PE=4 SV=1          |
| <b>G5ALF6</b> | Phosphoglycerate kinase OS=Heterocephalus glaber OX=10181 GN=PGK1 PE=3 SV=1                                             |
| <b>G5BJ78</b> | Rho GDP-dissociation inhibitor 1 OS=Heterocephalus glaber OX=10181 GN=ARHGDI1A PE=4 SV=1                                |
| <b>G5AMA2</b> | NAD-dependent protein deacetylase OS=Heterocephalus glaber OX=10181 GN=GW7_16704 PE=3 SV=1                              |
| <b>G5AYH2</b> | Elongation factor 1-gamma OS=Heterocephalus glaber OX=10181 GN=GW7_01766 PE=4 SV=1                                      |
| <b>G5APW6</b> | NipSnap-like protein 1 (Fragment) OS=Heterocephalus glaber OX=10181 GN=GW7_05309 PE=4 SV=1                              |



|               |                                                                                                                                 |
|---------------|---------------------------------------------------------------------------------------------------------------------------------|
| <b>G5BVI3</b> | 60S ribosomal protein L23a OS=Heterocephalus glaber OX=10181 GN=GW7_08185 PE=3 SV=1                                             |
| <b>G5BYE6</b> | Endophilin-A1 (Fragment) OS=Heterocephalus glaber OX=10181 GN=GW7_18987 PE=4 SV=1                                               |
| <b>G5AWP7</b> | GTP-binding nuclear protein Ran (Fragment) OS=Heterocephalus glaber OX=10181 GN=GW7_03170 PE=3 SV=1                             |
| <b>G5C662</b> | V-type proton ATPase subunit OS=Heterocephalus glaber OX=10181 GN=GW7_02358 PE=3 SV=1                                           |
| <b>G5BG31</b> | MICOS complex subunit MIC60 OS=Heterocephalus glaber OX=10181 GN=IMMT PE=3 SV=1                                                 |
| <b>G5BI03</b> | Cell division control protein 42-like protein OS=Heterocephalus glaber OX=10181 GN=GW7_07513 PE=4 SV=1                          |
| <b>G5BCT6</b> | Platelet-activating factor acetylhydrolase IB subunit alpha OS=Heterocephalus glaber OX=10181 GN=GW7_05075 PE=3 SV=1            |
| <b>G5BK64</b> | Phosphatidylinositol-5-phosphate 4-kinase type-2 beta (Fragment) OS=Heterocephalus glaber OX=10181 GN=GW7_13066 PE=4 SV=1       |
| <b>G5BSC6</b> | Ubiquitin carboxyl-terminal hydrolase 7 OS=Heterocephalus glaber OX=10181 GN=GW7_08972 PE=3 SV=1                                |
| <b>G5BXL7</b> | Glucose-6-phosphate isomerase OS=Heterocephalus glaber OX=10181 GN=GW7_18400 PE=3 SV=1                                          |
| <b>G5AN56</b> | Very-long-chain (3R)-3-hydroxyacyl-CoA dehydratase (Fragment) OS=Heterocephalus glaber OX=10181 GN=GW7_19668 PE=3 SV=1          |
| <b>G5BC67</b> | T-complex protein 1 subunit alpha OS=Heterocephalus glaber OX=10181 GN=GW7_11562 PE=3 SV=1                                      |
| <b>G5BML0</b> | Pleiotropic regulator 1 OS=Heterocephalus glaber OX=10181 GN=GW7_21603 PE=4 SV=1                                                |
| <b>G5C1J8</b> | Neurexin-1-alpha OS=Heterocephalus glaber OX=10181 GN=GW7_16388 PE=4 SV=1                                                       |
| <b>G5AP00</b> | Polyadenylate-binding protein OS=Heterocephalus glaber OX=10181 GN=GW7_00765 PE=3 SV=1                                          |
| <b>G5B8N7</b> | Vesicular glutamate transporter 1 OS=Heterocephalus glaber OX=10181 GN=GW7_15284 PE=4 SV=1                                      |
| <b>G5BZX7</b> | CaM kinase-like vesicle-associated protein OS=Heterocephalus glaber OX=10181 GN=GW7_19932 PE=4 SV=1                             |
| <b>G5BFY1</b> | Inactive hydroxysteroid dehydrogenase-like protein 1 OS=Heterocephalus glaber OX=10181 GN=GW7_15943 PE=3 SV=1                   |
| <b>G5C8Q4</b> | FAST kinase domain-containing protein 1 OS=Heterocephalus glaber OX=10181 GN=GW7_06207 PE=4 SV=1                                |
| <b>G5BY67</b> | 28S ribosomal protein S34, mitochondrial OS=Heterocephalus glaber OX=10181 GN=GW7_05752 PE=4 SV=1                               |
| <b>G5ARG8</b> | Heat shock 70 kDa protein 12A OS=Heterocephalus glaber OX=10181 GN=GW7_21295 PE=4 SV=1                                          |
| <b>G5C8J0</b> | Netrin-G1 ligand OS=Heterocephalus glaber OX=10181 GN=GW7_15729 PE=4 SV=1                                                       |
| <b>G5B6G5</b> | Reticulon OS=Heterocephalus glaber OX=10181 GN=GW7_20694 PE=4 SV=1                                                              |
| <b>G5C5Z1</b> | Amino acid transporter OS=Heterocephalus glaber OX=10181 GN=GW7_18352 PE=3 SV=1                                                 |
| <b>G5APK7</b> | Zinc transporter ZIP10 OS=Heterocephalus glaber OX=10181 GN=GW7_00937 PE=4 SV=1                                                 |
| <b>G5AQ53</b> | Mitochondrial pyruvate carrier OS=Heterocephalus glaber OX=10181 GN=GW7_21171 PE=3 SV=1                                         |
| <b>G5C384</b> | Pre-mRNA branch site protein p14 OS=Heterocephalus glaber OX=10181 GN=GW7_13983 PE=4 SV=1                                       |
| <b>G5BAT4</b> | Desmoplakin OS=Heterocephalus glaber OX=10181 GN=GW7_06449 PE=4 SV=1                                                            |
| <b>G5BFD9</b> | Zinc transporter ZIP12 OS=Heterocephalus glaber OX=10181 GN=GW7_20294 PE=4 SV=1                                                 |
| <b>G5C2S9</b> | Heterogeneous nuclear ribonucleoprotein H2 OS=Heterocephalus glaber OX=10181 GN=GW7_14140 PE=4 SV=1                             |
| <b>G5BSL6</b> | Eukaryotic translation initiation factor 3 subunit E OS=Heterocephalus glaber OX=10181 GN=EIF3E PE=3 SV=1                       |
| <b>G5C226</b> | Sodium-and chloride-dependent GABA transporter 3 OS=Heterocephalus glaber OX=10181 GN=GW7_20151 PE=4 SV=1                       |
| <b>G5B4Q7</b> | Arf-GAP with SH3 domain, ANK repeat and PH domain-containing protein 1 OS=Heterocephalus glaber OX=10181 GN=GW7_10926 PE=4 SV=1 |
| <b>G5B2A2</b> | Copine-6 OS=Heterocephalus glaber OX=10181 GN=GW7_11974 PE=4 SV=1                                                               |
| <b>G5BXJ3</b> | Myelin-associated glycoprotein isoform b OS=Heterocephalus glaber OX=10181 GN=MAG PE=4 SV=1                                     |
| <b>G5AX92</b> | Pentatricopeptide repeat-containing protein 1 OS=Heterocephalus glaber OX=10181 GN=GW7_06631 PE=4 SV=1                          |
| <b>G5AXV9</b> | Ezrin OS=Heterocephalus glaber OX=10181 GN=GW7_19302 PE=4 SV=1                                                                  |
| <b>G5C3G6</b> | Heat shock 70 kDa protein 1B OS=Heterocephalus glaber OX=10181 GN=GW7_04796 PE=3 SV=1                                           |
| <b>G5BX86</b> | Tubulin monoglycylase TTLL3 OS=Heterocephalus glaber OX=10181 GN=GW7_19486 PE=4 SV=1                                            |
| <b>G5BET5</b> | ATP-dependent RNA helicase DDX1 OS=Heterocephalus glaber OX=10181 GN=GW7_19785 PE=4 SV=1                                        |
| <b>G5B782</b> | 60S acidic ribosomal protein P0 OS=Heterocephalus glaber OX=10181 GN=RPLP0 PE=3 SV=1                                            |
| <b>G5AULO</b> | Isocitrate dehydrogenase [NAD] subunit, mitochondrial OS=Heterocephalus glaber OX=10181 GN=GW7_10868 PE=3 SV=1                  |
| <b>G5CAJ1</b> | Up-regulated during skeletal muscle growth protein 5 OS=Heterocephalus glaber OX=10181 GN=GW7_15920 PE=4 SV=1                   |
| <b>G5AJZ7</b> | Phosphatidylinositol-4-phosphate 5-kinase type-1 alpha OS=Heterocephalus glaber OX=10181 GN=GW7_10556 PE=4 SV=1                 |
| <b>G5AKW2</b> | RasGAP-activating-like protein 1 OS=Heterocephalus glaber OX=10181 GN=GW7_10151 PE=4 SV=1                                       |

|               |                                                                                                                                   |
|---------------|-----------------------------------------------------------------------------------------------------------------------------------|
| <b>G5BSB5</b> | G protein-coupled receptor kinase (Fragment) OS=Heterocephalus glaber OX=10181 GN=GW7_14698 PE=3 SV=1                             |
| <b>G5C6E9</b> | Myotubularin OS=Heterocephalus glaber OX=10181 GN=GW7_05400 PE=4 SV=1                                                             |
| <b>G5CBK6</b> | Trifunctional enzyme subunit beta, mitochondrial OS=Heterocephalus glaber OX=10181 GN=GW7_17038 PE=3 SV=1                         |
| <b>G5AN45</b> | NADH dehydrogenase [ubiquinone] 1 alpha subcomplex subunit 13 OS=Heterocephalus glaber OX=10181 GN=GW7_05858 PE=4 SV=1            |
| <b>G5AX86</b> | E3 ubiquitin-protein ligase OS=Heterocephalus glaber OX=10181 GN=GW7_06625 PE=4 SV=1                                              |
| <b>G5BYB7</b> | UPF0420 protein C16orf58 OS=Heterocephalus glaber OX=10181 GN=GW7_05117 PE=4 SV=1                                                 |
| <b>G5BLW2</b> | Glutamate receptor 2 OS=Heterocephalus glaber OX=10181 GN=GW7_04537 PE=3 SV=1                                                     |
| <b>G5BKB7</b> | Gamma-adducin OS=Heterocephalus glaber OX=10181 GN=GW7_14624 PE=4 SV=1                                                            |
| <b>G5BWQ7</b> | High affinity copper uptake protein 1 OS=Heterocephalus glaber OX=10181 GN=GW7_09545 PE=4 SV=1                                    |
| <b>G5ANZ0</b> | Cytochrome c oxidase subunit 6C OS=Heterocephalus glaber OX=10181 GN=GW7_00755 PE=4 SV=1                                          |
| <b>G5CBK7</b> | Trifunctional enzyme subunit alpha, mitochondrial OS=Heterocephalus glaber OX=10181 GN=HADHA PE=3 SV=1                            |
| <b>G5ANV7</b> | Phosphoglycerate mutase family member 5 OS=Heterocephalus glaber OX=10181 GN=GW7_09572 PE=4 SV=1                                  |
| <b>G5APR8</b> | BTB/POZ domain-containing protein KCTD16 OS=Heterocephalus glaber OX=10181 GN=GW7_01638 PE=4 SV=1                                 |
| <b>G5AW66</b> | NADH dehydrogenase [ubiquinone] 1 subunit C2 OS=Heterocephalus glaber OX=10181 GN=GW7_00914 PE=3 SV=1                             |
| <b>G5BBX1</b> | Calcium-dependent secretion activator 1 (Fragment) OS=Heterocephalus glaber OX=10181 GN=GW7_02265 PE=4 SV=1                       |
| <b>G5C351</b> | FERM, RhoGEF and pleckstrin domain-containing protein 1 (Fragment) OS=Heterocephalus glaber OX=10181 GN=GW7_12715 PE=4 SV=1       |
| <b>G5BZN6</b> | Succinate dehydrogenase [ubiquinone] iron-sulfur subunit, mitochondrial OS=Heterocephalus glaber OX=10181 GN=GW7_09699 PE=3 SV=1  |
| <b>G5B5W3</b> | Alanyl-tRNA synthetase, cytoplasmic OS=Heterocephalus glaber OX=10181 GN=AARS PE=3 SV=1                                           |
| <b>G5B6C9</b> | 40S ribosomal protein S3a OS=Heterocephalus glaber OX=10181 GN=GW7_08253 PE=4 SV=1                                                |
| <b>G5C077</b> | AFG3-like protein 2 (Fragment) OS=Heterocephalus glaber OX=10181 GN=GW7_12057 PE=3 SV=1                                           |
| <b>G5BPY0</b> | Sidoreflexin OS=Heterocephalus glaber OX=10181 GN=SFNX1 PE=3 SV=1                                                                 |
| <b>G5BD34</b> | C-4 methylsterol oxidase OS=Heterocephalus glaber OX=10181 GN=GW7_07430 PE=3 SV=1                                                 |
| <b>G5BBH0</b> | Ras-related protein Rap-1b isoform 1 OS=Heterocephalus glaber OX=10181 GN=RAP1B PE=4 SV=1                                         |
| <b>G5B5J9</b> | Tyrosine--tRNA ligase OS=Heterocephalus glaber OX=10181 GN=GW7_11504 PE=3 SV=1                                                    |
| <b>G5C0D0</b> | Neuronal cell adhesion molecule OS=Heterocephalus glaber OX=10181 GN=GW7_06596 PE=4 SV=1                                          |
| <b>G5BRW3</b> | Ribosomal protein L19 OS=Heterocephalus glaber OX=10181 GN=GW7_09589 PE=3 SV=1                                                    |
| <b>G5C7R9</b> | Proteasome subunit beta OS=Heterocephalus glaber OX=10181 GN=PSMB1 PE=3 SV=1                                                      |
| <b>G5BRG5</b> | Semaphorin-7A OS=Heterocephalus glaber OX=10181 GN=GW7_19539 PE=3 SV=1                                                            |
| <b>G5B6P2</b> | Neurexin-2-alpha OS=Heterocephalus glaber OX=10181 GN=GW7_20664 PE=4 SV=1                                                         |
| <b>G5ARH5</b> | Gamma-aminobutyric acid receptor subunit beta-2 OS=Heterocephalus glaber OX=10181 GN=GW7_13529 PE=3 SV=1                          |
| <b>G5AZL1</b> | 40S ribosomal protein S15 OS=Heterocephalus glaber OX=10181 GN=RPS15 PE=3 SV=1                                                    |
| <b>G5BYW2</b> | Phenylalanyl-tRNA synthetase alpha chain OS=Heterocephalus glaber OX=10181 GN=GW7_16082 PE=4 SV=1                                 |
| <b>G5B5D5</b> | Sodium/potassium-transporting ATPase subunit beta OS=Heterocephalus glaber OX=10181 GN=GW7_13837 PE=3 SV=1                        |
| <b>G5BNW3</b> | Rho-related GTP-binding protein RhoC OS=Heterocephalus glaber OX=10181 GN=GW7_03049 PE=4 SV=1                                     |
| <b>G5B2L9</b> | Rogdi-like protein OS=Heterocephalus glaber OX=10181 GN=GW7_19978 PE=4 SV=1                                                       |
| <b>G5C225</b> | Transporter OS=Heterocephalus glaber OX=10181 GN=GW7_20150 PE=3 SV=1                                                              |
| <b>G5BT86</b> | Kininogen-1 OS=Heterocephalus glaber OX=10181 GN=KNG1 PE=4 SV=1                                                                   |
| <b>G5B4Y6</b> | Beta-adducin OS=Heterocephalus glaber OX=10181 GN=ADD2 PE=4 SV=1                                                                  |
| <b>G5BYS2</b> | NADH dehydrogenase [ubiquinone] 1 beta subcomplex subunit 7 OS=Heterocephalus glaber OX=10181 GN=GW7_16042 PE=4 SV=1              |
| <b>G5AKN0</b> | N-acyl ethanolamine-hydrolyzing acid amidase OS=Heterocephalus glaber OX=10181 GN=GW7_21291 PE=3 SV=1                             |
| <b>G5BEP8</b> | Tyrosine-protein phosphatase non-receptor type substrate 1 OS=Heterocephalus glaber OX=10181 GN=GW7_13443 PE=4 SV=1               |
| <b>G5BRJ4</b> | Induced myeloid leukemia cell differentiation protein Mcl-1-like protein OS=Heterocephalus glaber OX=10181 GN=GW7_20578 PE=4 SV=1 |
| <b>G5CPH0</b> | ATP synthase subunit a OS=Heterocephalus glaber OX=10181 GN=ATP6 PE=4 SV=1                                                        |

|               |                                                                                                                                            |
|---------------|--------------------------------------------------------------------------------------------------------------------------------------------|
| <b>G5BV92</b> | Mu-crystallin-like protein OS=Heterocephalus glaber OX=10181 GN=CRYM PE=4 SV=1                                                             |
| <b>G5AQL0</b> | Hydroxyacyl-coenzyme A dehydrogenase, mitochondrial OS=Heterocephalus glaber OX=10181 GN=GW7_17857 PE=4 SV=1                               |
| <b>G5BWU7</b> | Catenin alpha-2 (Fragment) OS=Heterocephalus glaber OX=10181 GN=GW7_19189 PE=4 SV=1                                                        |
| <b>G5B6W3</b> | 60S ribosomal protein L35 OS=Heterocephalus glaber OX=10181 GN=RPL35 PE=3 SV=1                                                             |
| <b>G5APV2</b> | Splicing factor 3 subunit 1 OS=Heterocephalus glaber OX=10181 GN=SF3A1 PE=4 SV=1                                                           |
| <b>G5API3</b> | 60S ribosomal protein L13 OS=Heterocephalus glaber OX=10181 GN=RPL13 PE=3 SV=1                                                             |
| <b>G5AYQ6</b> | Zinc transporter 7 OS=Heterocephalus glaber OX=10181 GN=GW7_21185 PE=4 SV=1                                                                |
| <b>G5BX63</b> | NADH dehydrogenase (Ubiquinone) 1 beta subcomplex subunit 5, mitochondrial isoform 1 OS=Heterocephalus glaber OX=10181 GN=NDUFB5 PE=4 SV=1 |
| <b>G5BCR1</b> | NAD(P) transhydrogenase, mitochondrial OS=Heterocephalus glaber OX=10181 GN=GW7_04058 PE=4 SV=1                                            |
| <b>G5BWN6</b> | V-type proton ATPase subunit E 1 isoform b OS=Heterocephalus glaber OX=10181 GN=ATP6V1E1 PE=3 SV=1                                         |
| <b>G5AWB5</b> | Talin-2 OS=Heterocephalus glaber OX=10181 GN=GW7_00150 PE=4 SV=1                                                                           |
| <b>G5ATW7</b> | Carbonic anhydrase 2 (Fragment) OS=Heterocephalus glaber OX=10181 GN=GW7_14399 PE=4 SV=1                                                   |
| <b>G5BCE5</b> | Peroxiredoxin-4 OS=Heterocephalus glaber OX=10181 GN=PRDX4 PE=4 SV=1                                                                       |
| <b>G5AV28</b> | Synaptic vesicle glycoprotein 2B OS=Heterocephalus glaber OX=10181 GN=GW7_05778 PE=4 SV=1                                                  |
| <b>G5BN12</b> | Serine/threonine-protein phosphatase OS=Heterocephalus glaber OX=10181 GN=PPP2CA PE=3 SV=1                                                 |
| <b>G5BGY3</b> | Phenylalanine--tRNA ligase beta subunit OS=Heterocephalus glaber OX=10181 GN=FARSB PE=4 SV=1                                               |
| <b>G5B5Y3</b> | 40S ribosomal protein S4 OS=Heterocephalus glaber OX=10181 GN=GW7_15480 PE=3 SV=1                                                          |
| <b>G5B4R7</b> | Small nuclear ribonucleoprotein-associated protein B (Fragment) OS=Heterocephalus glaber OX=10181 GN=GW7_03184 PE=4 SV=1                   |
| <b>G5BYP8</b> | Bromodomain-containing protein 4 OS=Heterocephalus glaber OX=10181 GN=GW7_16018 PE=4 SV=1                                                  |
| <b>G5AW20</b> | Lupus La protein-like protein OS=Heterocephalus glaber OX=10181 GN=GW7_02256 PE=4 SV=1                                                     |
| <b>G5AZ44</b> | Putative cysteinyl-tRNA synthetase, mitochondrial OS=Heterocephalus glaber OX=10181 GN=GW7_00286 PE=3 SV=1                                 |
| <b>G5BAR1</b> | Cytosolic non-specific dipeptidase OS=Heterocephalus glaber OX=10181 GN=GW7_18554 PE=4 SV=1                                                |
| <b>G5BLB9</b> | Phytanoyl-CoA hydroxylase-interacting protein-like isoform 1 OS=Heterocephalus glaber OX=10181 GN=PHYHIPL PE=4 SV=1                        |
| <b>G5C720</b> | Glycogen debranching enzyme OS=Heterocephalus glaber OX=10181 GN=GW7_08051 PE=4 SV=1                                                       |
| <b>G5B6T9</b> | Amphiphysin OS=Heterocephalus glaber OX=10181 GN=GW7_09869 PE=4 SV=1                                                                       |
| <b>G5C053</b> | Clathrin heavy chain OS=Heterocephalus glaber OX=10181 GN=GW7_01835 PE=3 SV=1                                                              |
| <b>G5BL29</b> | Fumarate hydratase, mitochondrial OS=Heterocephalus glaber OX=10181 GN=FB PE=3 SV=1                                                        |
| <b>G5BQW4</b> | Proteasome subunit alpha type OS=Heterocephalus glaber OX=10181 GN=PSMA5 PE=3 SV=1                                                         |
| <b>G5B4D9</b> | Small conductance calcium-activated potassium channel protein 1 (Fragment) OS=Heterocephalus glaber OX=10181 GN=GW7_16479 PE=4 SV=1        |
| <b>G5BNX8</b> | ATP synthase subunit b, mitochondrial OS=Heterocephalus glaber OX=10181 GN=GW7_03064 PE=4 SV=1                                             |
| <b>G5ATA4</b> | Collagen alpha-1(XVIII) chain OS=Heterocephalus glaber OX=10181 GN=GW7_13728 PE=4 SV=1                                                     |
| <b>G5CBM7</b> | Apolipoprotein E OS=Heterocephalus glaber OX=10181 GN=GW7_18161 PE=2 SV=1                                                                  |
| <b>G5BCD2</b> | Asparaginyl-tRNA synthetase, cytoplasmic OS=Heterocephalus glaber OX=10181 GN=GW7_03772 PE=4 SV=1                                          |
| <b>G5BRC3</b> | Coronin OS=Heterocephalus glaber OX=10181 GN=GW7_14880 PE=3 SV=1                                                                           |
| <b>G5BIL3</b> | Peptidyl-prolyl cis-trans isomerase OS=Heterocephalus glaber OX=10181 GN=PPIA PE=3 SV=1                                                    |
| <b>G5ARB5</b> | Histone-lysine N-methyltransferase OS=Heterocephalus glaber OX=10181 GN=GW7_14304 PE=4 SV=1                                                |
| <b>G5BPH4</b> | Tubulin polymerization-promoting protein OS=Heterocephalus glaber OX=10181 GN=GW7_14713 PE=4 SV=1                                          |
| <b>E3VX74</b> | 40S ribosomal protein S27 OS=Heterocephalus glaber OX=10181 GN=GW7_11176 PE=2 SV=1                                                         |
| <b>G5AU15</b> | Pre-mRNA-processing factor 40-like protein B OS=Heterocephalus glaber OX=10181 GN=GW7_14447 PE=4 SV=1                                      |
| <b>G5BH25</b> | Splicing factor 3B subunit 4 OS=Heterocephalus glaber OX=10181 GN=GW7_05788 PE=4 SV=1                                                      |
| <b>G5BEC8</b> | Phosphatidylinositol-5-phosphate 4-kinase type-2 gamma OS=Heterocephalus glaber OX=10181 GN=GW7_04681 PE=4 SV=1                            |
| <b>G5BFF6</b> | Cytochrome b-c1 complex subunit 8 OS=Heterocephalus glaber OX=10181 GN=UQCRCQ PE=4 SV=1                                                    |
| <b>G5AXV0</b> | Catalase OS=Heterocephalus glaber OX=10181 GN=GW7_08865 PE=3 SV=1                                                                          |
| <b>G5ATA6</b> | Poly(RC)-binding protein 3 OS=Heterocephalus glaber OX=10181 GN=GW7_13730 PE=4 SV=1                                                        |
| <b>G5AY95</b> | NADH dehydrogenase (Ubiquinone) 1 beta subcomplex subunit 9 OS=Heterocephalus glaber OX=10181 GN=NDUFB9 PE=3 SV=1                          |
| <b>G5AZF7</b> | NADH dehydrogenase [ubiquinone] 1 beta subcomplex subunit 11, mitochondrial OS=Heterocephalus glaber OX=10181 GN=GW7_11280 PE=4 SV=1       |
| <b>G5BUE2</b> | Proteasome subunit alpha type (Fragment) OS=Heterocephalus glaber OX=10181 GN=GW7_21362 PE=3 SV=1                                          |
| <b>G5BGU2</b> | Regulator of G-protein signaling 7 OS=Heterocephalus glaber OX=10181 GN=GW7_20225 PE=4 SV=1                                                |

|               |                                                                                                                                   |
|---------------|-----------------------------------------------------------------------------------------------------------------------------------|
| <b>G5BMM2</b> | Pleckstrin-like protein domain-containing family A member 6 OS=Heterocephalus glaber OX=10181 GN=GW7_11215 PE=4 SV=1              |
| <b>G5BCG0</b> | Protein kinase C and casein kinase substrate in neurons protein 1 OS=Heterocephalus glaber OX=10181 GN=GW7_15650 PE=4 SV=1        |
| <b>G5BVV5</b> | Eukaryotic translation initiation factor 3 subunit A OS=Heterocephalus glaber OX=10181 GN=EIF3A PE=3 SV=1                         |
| <b>G5AS76</b> | 40S ribosomal protein S3 OS=Heterocephalus glaber OX=10181 GN=RPS3 PE=3 SV=1                                                      |
| <b>G5C4R0</b> | Succinyl-CoA:3-ketoacid-coenzyme A transferase OS=Heterocephalus glaber OX=10181 GN=GW7_19761 PE=3 SV=1                           |
| <b>G5AR57</b> | NADH dehydrogenase [ubiquinone] 1 alpha subcomplex subunit 2 (Fragment) OS=Heterocephalus glaber OX=10181 GN=GW7_12539 PE=4 SV=1  |
| <b>G5B165</b> | Multidrug resistance-associated protein 4 OS=Heterocephalus glaber OX=10181 GN=ABCC4 PE=4 SV=1                                    |
| <b>G5AZ20</b> | Gamma-aminobutyric acid type B receptor subunit 2 OS=Heterocephalus glaber OX=10181 GN=GW7_05037 PE=3 SV=1                        |
| <b>G5AKA6</b> | Adenylyl cyclase-associated protein OS=Heterocephalus glaber OX=10181 GN=GW7_18428 PE=3 SV=1                                      |
| <b>G5C7L2</b> | 40S ribosomal protein S7 OS=Heterocephalus glaber OX=10181 GN=RPS7 PE=3 SV=1                                                      |
| <b>G5BJM5</b> | 60S ribosomal protein L12 OS=Heterocephalus glaber OX=10181 GN=GW7_00296 PE=3 SV=1                                                |
| <b>G5CPG8</b> | Cytochrome c oxidase subunit 2 OS=Heterocephalus glaber OX=10181 GN=COX2 PE=3 SV=1                                                |
| <b>G5B5Y6</b> | Lysine--tRNA ligase OS=Heterocephalus glaber OX=10181 GN=KARS PE=3 SV=1                                                           |
| <b>G5BWW8</b> | Splicing factor 3B subunit 2 OS=Heterocephalus glaber OX=10181 GN=GW7_07186 PE=4 SV=1                                             |
| <b>G5B8P3</b> | 40S ribosomal protein S11 (Fragment) OS=Heterocephalus glaber OX=10181 GN=GW7_15290 PE=3 SV=1                                     |
| <b>G5AVA6</b> | Enoyl-CoA hydratase, mitochondrial OS=Heterocephalus glaber OX=10181 GN=GW7_07876 PE=3 SV=1                                       |
| <b>G5AYV0</b> | Synaptogyrin-1 (Fragment) OS=Heterocephalus glaber OX=10181 GN=GW7_02597 PE=4 SV=1                                                |
| <b>G5AYX6</b> | Pyridoxal phosphate phosphatase OS=Heterocephalus glaber OX=10181 GN=GW7_02557 PE=3 SV=1                                          |
| <b>G5C0Q7</b> | MICOS complex subunit MIC13 OS=Heterocephalus glaber OX=10181 GN=GW7_20494 PE=3 SV=1                                              |
| <b>G5BLB3</b> | CDGSH iron sulfur domain-containing protein 1 OS=Heterocephalus glaber OX=10181 GN=GW7_01960 PE=4 SV=1                            |
| <b>G5B7K2</b> | Calnexin OS=Heterocephalus glaber OX=10181 GN=GW7_17973 PE=3 SV=1                                                                 |
| <b>G5B8W4</b> | 40S ribosomal protein S27a OS=Heterocephalus glaber OX=10181 GN=RPS27A PE=4 SV=1                                                  |
| <b>G5BL47</b> | Cytochrome b-c1 complex subunit Rieske, mitochondrial OS=Heterocephalus glaber OX=10181 GN=UQCRCF1 PE=4 SV=1                      |
| <b>G5BN01</b> | Protein RUFY3 OS=Heterocephalus glaber OX=10181 GN=GW7_20521 PE=4 SV=1                                                            |
| <b>G5AWC6</b> | Transcription initiation factor IIA subunit 2 (Fragment) OS=Heterocephalus glaber OX=10181 GN=GW7_00161 PE=4 SV=1                 |
| <b>G5AZE3</b> | Receptor-type tyrosine-protein phosphatase zeta OS=Heterocephalus glaber OX=10181 GN=GW7_13190 PE=4 SV=1                          |
| <b>G5BAZ8</b> | Zinc transporter SLC39A7 OS=Heterocephalus glaber OX=10181 GN=SLC39A7 PE=4 SV=1                                                   |
| <b>G5BII7</b> | Dolichyl-diphosphooligosaccharide--protein glycosyltransferase subunit 1 OS=Heterocephalus glaber OX=10181 GN=GW7_10957 PE=3 SV=1 |
| <b>G5AQU8</b> | Ubiquitin-conjugating enzyme E2 O OS=Heterocephalus glaber OX=10181 GN=GW7_06422 PE=4 SV=1                                        |
| <b>G5BW10</b> | Epidermal growth factor receptor kinase substrate 8-like protein 1 OS=Heterocephalus glaber OX=10181 GN=GW7_11661 PE=4 SV=1       |
| <b>G5BWA4</b> | Proteasome subunit beta type-6 OS=Heterocephalus glaber OX=10181 GN=GW7_04618 PE=4 SV=1                                           |
| <b>G5B211</b> | 28S ribosomal protein S27, mitochondrial (Fragment) OS=Heterocephalus glaber OX=10181 GN=GW7_19014 PE=4 SV=1                      |
| <b>G5BAA4</b> | Heterogeneous nuclear ribonucleoprotein A1-like protein 2 OS=Heterocephalus glaber OX=10181 GN=GW7_16956 PE=4 SV=1                |
| <b>G5B7K7</b> | 40S ribosomal protein S5 OS=Heterocephalus glaber OX=10181 GN=GW7_05598 PE=3 SV=1                                                 |
| <b>G5BFU9</b> | N6-adenosine-methyltransferase 70 kDa subunit OS=Heterocephalus glaber OX=10181 GN=METTL3 PE=3 SV=1                               |
| <b>G5BX57</b> | SLIT-ROBO Rho GTPase-activating protein 2 OS=Heterocephalus glaber OX=10181 GN=GW7_13782 PE=4 SV=1                                |
| <b>G5AKY1</b> | Neuronal membrane glycoprotein M6-b OS=Heterocephalus glaber OX=10181 GN=GW7_16652 PE=4 SV=1                                      |
| <b>G5AVC6</b> | UDP-glucuronosyltransferase OS=Heterocephalus glaber OX=10181 GN=GW7_15973 PE=3 SV=1                                              |
| <b>G5AL84</b> | Leucine-rich PPR motif-containing protein, mitochondrial (Fragment) OS=Heterocephalus glaber OX=10181 GN=GW7_03995 PE=4 SV=1      |
| <b>G5AUX0</b> | Optic atrophy 3 protein OS=Heterocephalus glaber OX=10181 GN=GW7_18095 PE=4 SV=1                                                  |
| <b>G5B3V9</b> | Engulfment and cell motility protein 1 OS=Heterocephalus glaber OX=10181 GN=GW7_09458 PE=4 SV=1                                   |
| <b>G5B6U4</b> | Ras-related protein Ral-A OS=Heterocephalus glaber OX=10181 GN=RALA PE=4 SV=1                                                     |



|               |                                                                                                                            |
|---------------|----------------------------------------------------------------------------------------------------------------------------|
| <b>G5AV01</b> | AP complex subunit sigma OS=Heterocephalus glaber OX=10181 GN=GW7_18126 PE=3 SV=1                                          |
| <b>G5C7Y3</b> | V-type proton ATPase subunit D OS=Heterocephalus glaber OX=10181 GN=ATP6V1D PE=4 SV=1                                      |
| <b>G5B4M8</b> | ELAV-like protein (Fragment) OS=Heterocephalus glaber OX=10181 GN=GW7_02477 PE=3 SV=1                                      |
| <b>G5C705</b> | Leucine-rich glioma-inactivated protein 1 OS=Heterocephalus glaber OX=10181 GN=LGI1 PE=4 SV=1                              |
| <b>G5BPE1</b> | tRNA-splicing ligase RtcB homolog OS=Heterocephalus glaber OX=10181 GN=RTCB PE=3 SV=1                                      |
| <b>G5BK63</b> | Proteasome subunit beta OS=Heterocephalus glaber OX=10181 GN=GW7_13065 PE=3 SV=1                                           |
| <b>G5BMY3</b> | Golgi SNAP receptor complex member 2 isoform A OS=Heterocephalus glaber OX=10181 GN=GOSR2 PE=3 SV=1                        |
| <b>G5BBC3</b> | Splicing factor 3A subunit 2 OS=Heterocephalus glaber OX=10181 GN=GW7_07321 PE=4 SV=1                                      |
| <b>G5AVX4</b> | Phosphatidylinositol-5-phosphate 4-kinase type-2 alpha OS=Heterocephalus glaber OX=10181 GN=GW7_05903 PE=4 SV=1            |
| <b>G5C0T9</b> | NADH dehydrogenase [ubiquinone] 1 alpha subcomplex subunit 12 OS=Heterocephalus glaber OX=10181 GN=NDUFA12 PE=3 SV=1       |
| <b>G5C835</b> | Propionyl-CoA carboxylase beta chain, mitochondrial OS=Heterocephalus glaber OX=10181 GN=GW7_21808 PE=4 SV=1               |
| <b>G5B795</b> | 60S ribosomal protein L31 OS=Heterocephalus glaber OX=10181 GN=GW7_13242 PE=4 SV=1                                         |
| <b>G5BPN1</b> | Solute carrier family 2, facilitated glucose transporter member 3 OS=Heterocephalus glaber OX=10181 GN=GW7_17311 PE=3 SV=1 |
| <b>G5BTQ7</b> | Succinate--CoA ligase [ADP-forming] subunit beta, mitochondrial OS=Heterocephalus glaber OX=10181 GN=SUCLA2 PE=3 SV=1      |
| <b>G5B6G2</b> | Non-specific serine/threonine protein kinase (Fragment) OS=Heterocephalus glaber OX=10181 GN=GW7_20691 PE=4 SV=1           |
| <b>G5B224</b> | Hsp90 co-chaperone Cdc37 OS=Heterocephalus glaber OX=10181 GN=CDC37 PE=4 SV=1                                              |
| <b>G5BBP0</b> | 2,4-dienoyl-CoA reductase, mitochondrial OS=Heterocephalus glaber OX=10181 GN=GW7_09360 PE=4 SV=1                          |
| <b>G5BY63</b> | Hydroxyacylglutathione hydrolase, mitochondrial OS=Heterocephalus glaber OX=10181 GN=GW7_05748 PE=3 SV=1                   |
| <b>G5BFW4</b> | Protein NDRG2 OS=Heterocephalus glaber OX=10181 GN=GW7_08519 PE=4 SV=1                                                     |
| <b>G5BAG3</b> | RuvB-like helicase OS=Heterocephalus glaber OX=10181 GN=RUVBL2 PE=3 SV=1                                                   |
| <b>G5ASV2</b> | Nucleolin OS=Heterocephalus glaber OX=10181 GN=GW7_10373 PE=4 SV=1                                                         |
| <b>G5BC44</b> | Ras-related protein Rab-7a OS=Heterocephalus glaber OX=10181 GN=GW7_12906 PE=4 SV=1                                        |
| <b>G5BF50</b> | Eukaryotic translation initiation factor 3 subunit B OS=Heterocephalus glaber OX=10181 GN=EIF3B PE=3 SV=1                  |
| <b>G5BHQ8</b> | Kalirin OS=Heterocephalus glaber OX=10181 GN=GW7_14844 PE=4 SV=1                                                           |
| <b>G5AYG1</b> | Cleavage and polyadenylation specificity factor subunit 7 OS=Heterocephalus glaber OX=10181 GN=GW7_01755 PE=4 SV=1         |
| <b>G5B2H6</b> | Sodium/potassium/calcium exchanger 2 OS=Heterocephalus glaber OX=10181 GN=GW7_00607 PE=3 SV=1                              |
