# Supplementary material for: Acute Hypoxia Alters Extracellular Vesicle Signatures and the Brain Citrullinome of Naked Mole-Rats (Heterocephalus glaber)
Source: MDPI journal article supplement (doi:10.3390/ijms23094683), 2022-04-23
Supplement: s1 [file s1]

**Supplementary Table S2. The brain citrullinome in hypoxia.** Full list of naked mole-rat protein hits from LC-MS/MS analysis of F95 enriched proteins isolated from brains of naked mole-rats (*Heterocephalus glaber*) following hypoxia; hits specific for the hypoxia group only are highlighted in pink.

| Protein ID | Protein name                                                                                                     |
|------------|------------------------------------------------------------------------------------------------------------------|
| G5B8V8     | Spectrin beta chain OS=Heterocephalus glaber OX=10181 GN=GW7_15253 PE=3 SV=1                                     |
| G5ASE4     | Spectrin alpha chain, brain OS=Heterocephalus glaber OX=10181 GN=GW7_01914 PE=4 SV=1                             |
| G5AZQ6     | Sodium/potassium-transporting ATPase subunit alpha OS=Heterocephalus glaber OX=10181 GN=GW7_15424 PE=3 SV=1      |
| G5C9E0     | DmX-like protein 2 OS=Heterocephalus glaber OX=10181 GN=GW7_04224 PE=4 SV=1                                      |
| G5BWK9     | Sodium/potassium-transporting ATPase subunit alpha-2 OS=Heterocephalus glaber OX=10181 GN=GW7_00530 PE=3 SV=1    |
| G5BFJ7     | Sodium/potassium-transporting ATPase subunit alpha OS=Heterocephalus glaber OX=10181 GN=GW7_09834 PE=3 SV=1      |
| G5BY99     | Dihydropyrimidinase-related protein 2 (Fragment) OS=Heterocephalus glaber OX=10181 GN=GW7_07625 PE=4 SV=1        |
| G5BL81     | ATP synthase subunit alpha OS=Heterocephalus glaber OX=10181 GN=ATP5A1 PE=3 SV=1                                 |
| G5BHB1     | Pyruvate kinase OS=Heterocephalus glaber OX=10181 GN=GW7_06053 PE=3 SV=1                                         |
| G5ASF4     | Dynamin-1 (Fragment) OS=Heterocephalus glaber OX=10181 GN=GW7_01924 PE=3 SV=1                                    |
| G5BS02     | Heat shock cognate 71 kDa protein OS=Heterocephalus glaber OX=10181 GN=GW7_03309 PE=3 SV=1                       |
| G5BLH0     | Syntaxin-binding protein 1 OS=Heterocephalus glaber OX=10181 GN=GW7_06738 PE=3 SV=1                              |
| G5C895     | Clathrin heavy chain OS=Heterocephalus glaber OX=10181 GN=GW7_08300 PE=3 SV=1                                    |
| G5B184     | Hexokinase-1 OS=Heterocephalus glaber OX=10181 GN=GW7_10633 PE=3 SV=1                                            |
| G5ATF9     | Glutamate dehydrogenase 1, mitochondrial OS=Heterocephalus glaber OX=10181 GN=GW7_14620 PE=3 SV=1                |
| G5BB67     | ATP synthase subunit beta OS=Heterocephalus glaber OX=10181 GN=GW7_15746 PE=3 SV=1                               |
| G5B0C4     | Synapsin-1 OS=Heterocephalus glaber OX=10181 GN=GW7_10284 PE=4 SV=1                                              |
| G5ARR9     | Tenascin-R OS=Heterocephalus glaber OX=10181 GN=GW7_21557 PE=4 SV=1                                              |
| G5AST8     | Homer protein-like protein 1 (Fragment) OS=Heterocephalus glaber OX=10181 GN=GW7_06603 PE=4 SV=1                 |
| G5ANG4     | Calcium-binding mitochondrial carrier protein Aralar1 OS=Heterocephalus glaber OX=10181 GN=SLC25A12 PE=3 SV=1    |
| G5BXS0     | Fructose-bisphosphate aldolase OS=Heterocephalus glaber OX=10181 GN=GW7_19061 PE=3 SV=1                          |
| G5AU24     | Tubulin alpha-1C chain OS=Heterocephalus glaber OX=10181 GN=GW7_14456 PE=3 SV=1                                  |
| G5BPP6     | Aconitate hydratase, mitochondrial OS=Heterocephalus glaber OX=10181 GN=GW7_19434 PE=3 SV=1                      |
| G5BNN8     | Heat shock cognate protein HSP 90-beta OS=Heterocephalus glaber OX=10181 GN=GW7_19161 PE=3 SV=1                  |
| G5AKJ8     | Tubulin alpha chain OS=Heterocephalus glaber OX=10181 GN=GW7_07278 PE=3 SV=1                                     |
| G5BXB9     | Transitional endoplasmic reticulum ATPase (Fragment) OS=Heterocephalus glaber OX=10181 GN=GW7_03434 PE=3 SV=1    |
| G5BJV3     | Alpha-1,4 glucan phosphorylase OS=Heterocephalus glaber OX=10181 GN=GW7_03733 PE=3 SV=1                          |
| G5B5P2     | Serum albumin (Fragment) OS=Heterocephalus glaber OX=10181 GN=GW7_11087 PE=4 SV=1                                |
| G5BFZ1     | Tubulin beta chain OS=Heterocephalus glaber OX=10181 GN=GW7_03924 PE=3 SV=1                                      |
| G5BVT0     | Malic enzyme OS=Heterocephalus glaber OX=10181 GN=GW7_16261 PE=3 SV=1                                            |
| G5BVP2     | ARF GTPase-activating protein GIT1 OS=Heterocephalus glaber OX=10181 GN=GW7_08203 PE=4 SV=1                      |
| G5B0L2     | 2',3'-cyclic-nucleotide 3'-phosphodiesterase (Fragment) OS=Heterocephalus glaber OX=10181 GN=GW7_06865 PE=4 SV=1 |
| G5APH2     | Tubulin beta chain OS=Heterocephalus glaber OX=10181 GN=GW7_12416 PE=3 SV=1                                      |
| G5BTG2     | Putative ATP-dependent RNA helicase DHX30 (Fragment) OS=Heterocephalus glaber OX=10181 GN=GW7_17258 PE=4 SV=1    |
| G5ARA1     | Lamin-A/C OS=Heterocephalus glaber OX=10181 GN=GW7_14290 PE=3 SV=1                                               |
| G5C8F7     | AP-2 complex subunit alpha OS=Heterocephalus glaber OX=10181 GN=GW7_12697 PE=3 SV=1                              |

|               |                                                                                                                         |
|---------------|-------------------------------------------------------------------------------------------------------------------------|
| <b>G5C6D8</b> | Splicing factor, proline-and glutamine-rich OS=Heterocephalus glaber OX=10181 GN=GW7_05389 PE=4 SV=1                    |
| <b>G5B750</b> | AP complex subunit beta OS=Heterocephalus glaber OX=10181 GN=GW7_18272 PE=3 SV=1                                        |
| <b>G5C546</b> | Alpha-enolase OS=Heterocephalus glaber OX=10181 GN=GW7_09136 PE=2 SV=1                                                  |
| <b>G5B8Q7</b> | AP-2 complex subunit alpha OS=Heterocephalus glaber OX=10181 GN=GW7_15304 PE=3 SV=1                                     |
| <b>G5BJ63</b> | Actin, cytoplasmic 2 OS=Heterocephalus glaber OX=10181 GN=GW7_04078 PE=3 SV=1                                           |
| <b>G5BWZ4</b> | Spectrin beta chain OS=Heterocephalus glaber OX=10181 GN=GW7_07212 PE=3 SV=1                                            |
| <b>G5BW26</b> | Non-POU domain-containing octamer-binding protein OS=Heterocephalus glaber OX=10181 GN=NONO PE=4 SV=1                   |
| <b>G5BI78</b> | Actin, cytoplasmic 1 OS=Heterocephalus glaber OX=10181 GN=GW7_16883 PE=3 SV=1                                           |
| <b>G5BVH5</b> | Fructose-bisphosphate aldolase OS=Heterocephalus glaber OX=10181 GN=GW7_08177 PE=3 SV=1                                 |
| <b>G5BD04</b> | Heat shock-related 70 kDa protein 2 OS=Heterocephalus glaber OX=10181 GN=GW7_17513 PE=3 SV=1                            |
| <b>G5BTH0</b> | Dihydropyrimidinase-related protein 3 OS=Heterocephalus glaber OX=10181 GN=DPYSL3 PE=4 SV=1                             |
| <b>G5BMY6</b> | Vesicle-fusing ATPase (Fragment) OS=Heterocephalus glaber OX=10181 GN=GW7_07669 PE=4 SV=1                               |
| <b>G5AMA4</b> | Heterogeneous nuclear ribonucleoprotein L OS=Heterocephalus glaber OX=10181 GN=GW7_16706 PE=4 SV=1                      |
| <b>G5BGJ6</b> | Contactin-1 OS=Heterocephalus glaber OX=10181 GN=GW7_19026 PE=4 SV=1                                                    |
| <b>G5AL32</b> | V-type proton ATPase catalytic subunit A OS=Heterocephalus glaber OX=10181 GN=GW7_03605 PE=3 SV=1                       |
| <b>G5BUP0</b> | Transketolase OS=Heterocephalus glaber OX=10181 GN=GW7_01625 PE=4 SV=1                                                  |
| <b>G5BE32</b> | Putative pre-mRNA-splicing factor ATP-dependent RNA helicase DHX15 OS=Heterocephalus glaber OX=10181 GN=DHX15 PE=4 SV=1 |
| <b>G5AZ41</b> | Rho guanine nucleotide exchange factor 7 OS=Heterocephalus glaber OX=10181 GN=GW7_00283 PE=4 SV=1                       |
| <b>G5B318</b> | Dihydropyrimidinase-related protein 1 (Fragment) OS=Heterocephalus glaber OX=10181 GN=GW7_14551 PE=4 SV=1               |
| <b>G5AZ97</b> | Triple functional domain protein OS=Heterocephalus glaber OX=10181 GN=GW7_01985 PE=4 SV=1                               |
| <b>G5BXH3</b> | Putative proline--tRNA ligase, mitochondrial OS=Heterocephalus glaber OX=10181 GN=PARS2 PE=4 SV=1                       |
| <b>G5BV89</b> | Cytochrome b-c1 complex subunit 2, mitochondrial OS=Heterocephalus glaber OX=10181 GN=UQCRC2 PE=3 SV=1                  |
| <b>G5BSI9</b> | Calcium-transporting ATPase OS=Heterocephalus glaber OX=10181 GN=GW7_13643 PE=3 SV=1                                    |
| <b>G5C5M0</b> | NADH-ubiquinone oxidoreductase 75 kDa subunit, mitochondrial OS=Heterocephalus glaber OX=10181 GN=GW7_17583 PE=3 SV=1   |
| <b>G5BAX8</b> | Septin-7 OS=Heterocephalus glaber OX=10181 GN=GW7_00168 PE=3 SV=1                                                       |
| <b>G5BGB3</b> | Cullin-associated NEDD8-dissociated protein 1 OS=Heterocephalus glaber OX=10181 GN=CAND1 PE=4 SV=1                      |
| <b>G5CAP7</b> | Glyceraldehyde-3-phosphate dehydrogenase (Fragment) OS=Heterocephalus glaber OX=10181 GN=GW7_12106 PE=3 SV=1            |
| <b>G5ATM3</b> | ERC protein 2 OS=Heterocephalus glaber OX=10181 GN=GW7_00199 PE=4 SV=1                                                  |
| <b>G5B7T4</b> | Kinesin heavy chain isoform 5C OS=Heterocephalus glaber OX=10181 GN=GW7_17996 PE=3 SV=1                                 |
| <b>G5BKE5</b> | Tubulin beta chain OS=Heterocephalus glaber OX=10181 GN=GW7_11747 PE=3 SV=1                                             |
| <b>G5AZF9</b> | Ubiquitin-like modifier-activating enzyme 1 OS=Heterocephalus glaber OX=10181 GN=GW7_11282 PE=3 SV=1                    |
| <b>G5C0R6</b> | Dipeptidyl peptidase 9 OS=Heterocephalus glaber OX=10181 GN=GW7_20503 PE=3 SV=1                                         |
| <b>G5ANV4</b> | Golgin subfamily A member 3 OS=Heterocephalus glaber OX=10181 GN=GW7_09569 PE=4 SV=1                                    |
| <b>G5ALS1</b> | Keratin, type II cytoskeletal 6B OS=Heterocephalus glaber OX=10181 GN=GW7_03778 PE=3 SV=1                               |
| <b>G5AXZ3</b> | 2-oxoglutarate dehydrogenase E1 component-like, mitochondrial OS=Heterocephalus glaber OX=10181 GN=GW7_10398 PE=4 SV=1  |
| <b>G5BY30</b> | Aminopeptidase OS=Heterocephalus glaber OX=10181 GN=GW7_00454 PE=3 SV=1                                                 |
| <b>G5BEX6</b> | Neural cell adhesion molecule 1 OS=Heterocephalus glaber OX=10181 GN=GW7_02493 PE=4 SV=1                                |
| <b>G5B1L2</b> | Band 4.1-like protein 3 OS=Heterocephalus glaber OX=10181 GN=GW7_17835 PE=4 SV=1                                        |

|               |                                                                                                                                            |
|---------------|--------------------------------------------------------------------------------------------------------------------------------------------|
| <b>G5BU67</b> | ADP/ATP translocase 2 OS=Heterocephalus glaber OX=10181 GN=GW7_07398 PE=3 SV=1                                                             |
| <b>G5C4F1</b> | Tubulin beta chain OS=Heterocephalus glaber OX=10181 GN=GW7_15271 PE=3 SV=1                                                                |
| <b>G5ARE5</b> | Vacuolar proton pump subunit B OS=Heterocephalus glaber OX=10181 GN=GW7_01073 PE=3 SV=1                                                    |
| <b>G5BTE1</b> | AP-2 complex subunit mu-1 OS=Heterocephalus glaber OX=10181 GN=GW7_17237 PE=3 SV=1                                                         |
| <b>G5ALS3</b> | Keratin, type II cytoskeletal 5 OS=Heterocephalus glaber OX=10181 GN=GW7_03780 PE=3 SV=1                                                   |
| <b>G5AW57</b> | Aspartate aminotransferase OS=Heterocephalus glaber OX=10181 GN=GOT2 PE=4 SV=1                                                             |
| <b>G5BJQ1</b> | Septin-11 OS=Heterocephalus glaber OX=10181 GN=GW7_19874 PE=3 SV=1                                                                         |
| <b>G5BEG2</b> | L-lactate dehydrogenase OS=Heterocephalus glaber OX=10181 GN=GW7_05659 PE=2 SV=1                                                           |
| <b>G5BM52</b> | Creatine kinase U-type, mitochondrial OS=Heterocephalus glaber OX=10181 GN=GW7_18774 PE=3 SV=1                                             |
| <b>G5B139</b> | Amino acid transporter OS=Heterocephalus glaber OX=10181 GN=GW7_01386 PE=3 SV=1                                                            |
| <b>G5AMR7</b> | Protein ERGIC-53 OS=Heterocephalus glaber OX=10181 GN=GW7_20044 PE=4 SV=1                                                                  |
| <b>G5C9J0</b> | Synaptotagmin-1 OS=Heterocephalus glaber OX=10181 GN=GW7_11734 PE=4 SV=1                                                                   |
| <b>G5C4U7</b> | Aspartate aminotransferase OS=Heterocephalus glaber OX=10181 GN=GOT1 PE=4 SV=1                                                             |
| <b>G5BX71</b> | Calcium-transporting ATPase OS=Heterocephalus glaber OX=10181 GN=GW7_19471 PE=3 SV=1                                                       |
| <b>G5BMD6</b> | Ankyrin-2 (Fragment) OS=Heterocephalus glaber OX=10181 GN=GW7_01307 PE=4 SV=1                                                              |
| <b>G5B360</b> | Calcium-transporting ATPase OS=Heterocephalus glaber OX=10181 GN=GW7_12839 PE=3 SV=1                                                       |
| <b>G5C6E3</b> | Neurochondrin (Fragment) OS=Heterocephalus glaber OX=10181 GN=GW7_05394 PE=4 SV=1                                                          |
| <b>G5BKE6</b> | Tubulin beta chain OS=Heterocephalus glaber OX=10181 GN=GW7_11748 PE=3 SV=1                                                                |
| <b>G5APX0</b> | AP complex subunit beta OS=Heterocephalus glaber OX=10181 GN=GW7_05313 PE=3 SV=1                                                           |
| <b>G5B577</b> | Acylglycerol kinase, mitochondrial OS=Heterocephalus glaber OX=10181 GN=GW7_11853 PE=4 SV=1                                                |
| <b>G5BU71</b> | Septin-6 OS=Heterocephalus glaber OX=10181 GN=GW7_07402 PE=3 SV=1                                                                          |
| <b>G5B3C5</b> | Serine/threonine-protein phosphatase 2A 65 kDa regulatory subunit A alpha isoform OS=Heterocephalus glaber OX=10181 GN=GW7_06227 PE=4 SV=1 |
| <b>G5ASD2</b> | Leucine-rich repeat-containing protein 8A OS=Heterocephalus glaber OX=10181 GN=LRR8A PE=4 SV=1                                             |
| <b>G5BI16</b> | Putative heat shock protein HSP 90-beta-3 OS=Heterocephalus glaber OX=10181 GN=GW7_02247 PE=4 SV=1                                         |
| <b>G5BXQ6</b> | Neurofascin OS=Heterocephalus glaber OX=10181 GN=GW7_15814 PE=4 SV=1                                                                       |
| <b>G5AKA3</b> | L-lactate dehydrogenase OS=Heterocephalus glaber OX=10181 GN=GW7_11628 PE=2 SV=1                                                           |
| <b>G5BIL1</b> | 2-oxoglutarate dehydrogenase E1 component, mitochondrial OS=Heterocephalus glaber OX=10181 GN=GW7_08272 PE=4 SV=1                          |
| <b>G5BBZ6</b> | Guanine nucleotide-binding protein G(I)/G(S)/G(T) subunit beta-2 OS=Heterocephalus glaber OX=10181 GN=GNB2 PE=4 SV=1                       |
| <b>G5BWB9</b> | ATP-dependent 6-phosphofructokinase OS=Heterocephalus glaber OX=10181 GN=GW7_07004 PE=3 SV=1                                               |
| <b>G5CAA4</b> | Isocitrate dehydrogenase [NADP] OS=Heterocephalus glaber OX=10181 GN=GW7_08829 PE=3 SV=1                                                   |
| <b>G5BN09</b> | Voltage-dependent anion-selective channel protein 1 OS=Heterocephalus glaber OX=10181 GN=VDAC1 PE=4 SV=1                                   |
| <b>G5BT87</b> | Histidine-rich glycoprotein OS=Heterocephalus glaber OX=10181 GN=GW7_17202 PE=4 SV=1                                                       |
| <b>G5BG62</b> | Malate dehydrogenase OS=Heterocephalus glaber OX=10181 GN=GW7_08880 PE=3 SV=1                                                              |
| <b>G5B6T3</b> | ATP-dependent 6-phosphofructokinase OS=Heterocephalus glaber OX=10181 GN=GW7_21506 PE=3 SV=1                                               |
| <b>G5BA48</b> | Stress-70 protein, mitochondrial OS=Heterocephalus glaber OX=10181 GN=GW7_10091 PE=3 SV=1                                                  |
| <b>G5AMM5</b> | LanC-like protein 2 OS=Heterocephalus glaber OX=10181 GN=GW7_07012 PE=4 SV=1                                                               |
| <b>G5C1Q0</b> | Splicing factor 3B subunit 3 OS=Heterocephalus glaber OX=10181 GN=GW7_01482 PE=4 SV=1                                                      |
| <b>G5BSN0</b> | Dedicator of cytokinesis protein 8 OS=Heterocephalus glaber OX=10181 GN=GW7_01505 PE=3 SV=1                                                |
| <b>G5AKY4</b> | Heat shock 70 kDa protein 4L OS=Heterocephalus glaber OX=10181 GN=GW7_10899 PE=3 SV=1                                                      |
| <b>G5BJY3</b> | Succinate-semialdehyde dehydrogenase (Fragment) OS=Heterocephalus glaber OX=10181 GN=GW7_06350 PE=3 SV=1                                   |
| <b>G5AZ30</b> | Endoplasmic reticulum resident protein 44 OS=Heterocephalus glaber OX=10181 GN=ERP44 PE=4 SV=1                                             |
| <b>G5BN06</b> | Heat shock 70 kDa protein 4 OS=Heterocephalus glaber OX=10181 GN=HSPA4 PE=3 SV=1                                                           |
| <b>G5AKB7</b> | Anion exchange protein OS=Heterocephalus glaber OX=10181 GN=GW7_07691 PE=3 SV=1                                                            |

|               |                                                                                                                               |
|---------------|-------------------------------------------------------------------------------------------------------------------------------|
| <b>G5AVJ8</b> | Nck-associated protein 1 (Fragment) OS=Heterocephalus glaber OX=10181 GN=GW7_12399 PE=4 SV=1                                  |
| <b>G5BS33</b> | Hemoglobin subunit beta OS=Heterocephalus glaber OX=10181 GN=GW7_03824 PE=3 SV=1                                              |
| <b>G5ATH6</b> | Guanine nucleotide-binding protein G(l)/G(s)/G(t) subunit beta-1 OS=Heterocephalus glaber OX=10181 GN=GNB1 PE=4 SV=1          |
| <b>G5B212</b> | Microtubule-associated protein 1B OS=Heterocephalus glaber OX=10181 GN=GW7_19015 PE=4 SV=1                                    |
| <b>G5B4D4</b> | Ras-related protein Rab-3A OS=Heterocephalus glaber OX=10181 GN=RAB3A PE=4 SV=1                                               |
| <b>G5BW99</b> | Mitochondrial 2-oxoglutarate/malate carrier protein isoform 2 OS=Heterocephalus glaber OX=10181 GN=SLC25A11 PE=3 SV=1         |
| <b>G5BI79</b> | Fascin OS=Heterocephalus glaber OX=10181 GN=GW7_16884 PE=4 SV=1                                                               |
| <b>G5B2W9</b> | ADP/ATP translocase 1 OS=Heterocephalus glaber OX=10181 GN=GW7_12487 PE=3 SV=1                                                |
| <b>G5B0M6</b> | Keratin, type I cytoskeletal 14 OS=Heterocephalus glaber OX=10181 GN=GW7_06879 PE=3 SV=1                                      |
| <b>G5C2C6</b> | Dihydrolipoyl dehydrogenase OS=Heterocephalus glaber OX=10181 GN=DLD PE=3 SV=1                                                |
| <b>G5B4X0</b> | Calcium-transporting ATPase OS=Heterocephalus glaber OX=10181 GN=GW7_06050 PE=3 SV=1                                          |
| <b>G5APJ0</b> | Synapsin-2 OS=Heterocephalus glaber OX=10181 GN=GW7_10966 PE=4 SV=1                                                           |
| <b>G5CAS2</b> | Prohibitin-2 OS=Heterocephalus glaber OX=10181 GN=GW7_12131 PE=4 SV=1                                                         |
| <b>G5BHP2</b> | E3 ubiquitin-protein ligase CBL (Fragment) OS=Heterocephalus glaber OX=10181 GN=GW7_18686 PE=4 SV=1                           |
| <b>G5B6D0</b> | Glutamine synthetase OS=Heterocephalus glaber OX=10181 GN=GW7_08254 PE=3 SV=1                                                 |
| <b>G5C5Z3</b> | Ras-related protein Rab-1A (Fragment) OS=Heterocephalus glaber OX=10181 GN=GW7_18354 PE=4 SV=1                                |
| <b>G5CAZ8</b> | Acetyltransferase component of pyruvate dehydrogenase complex OS=Heterocephalus glaber OX=10181 GN=DLAT PE=3 SV=1             |
| <b>G5BKX2</b> | Cytoplasmic FMR1-interacting protein 2 OS=Heterocephalus glaber OX=10181 GN=GW7_12158 PE=4 SV=1                               |
| <b>G5B6V7</b> | 78 kDa glucose-regulated protein OS=Heterocephalus glaber OX=10181 GN=HSPA5 PE=3 SV=1                                         |
| <b>G5AP69</b> | Serine/threonine-protein phosphatase (Fragment) OS=Heterocephalus glaber OX=10181 GN=GW7_10360 PE=3 SV=1                      |
| <b>G5BBX1</b> | Calcium-dependent secretion activator 1 (Fragment) OS=Heterocephalus glaber OX=10181 GN=GW7_02265 PE=4 SV=1                   |
| <b>G5BMR4</b> | Guanine nucleotide-binding protein G(O) subunit alpha (Fragment) OS=Heterocephalus glaber OX=10181 GN=GW7_09344 PE=4 SV=1     |
| <b>G5BXL7</b> | Glucose-6-phosphate isomerase OS=Heterocephalus glaber OX=10181 GN=GW7_18400 PE=3 SV=1                                        |
| <b>G5BH24</b> | Synaptic vesicle glycoprotein 2A OS=Heterocephalus glaber OX=10181 GN=SV2A PE=4 SV=1                                          |
| <b>G5BYJ8</b> | Hemoglobin subunit beta OS=Heterocephalus glaber OX=10181 GN=GW7_14163 PE=3 SV=1                                              |
| <b>G5AXS2</b> | Ras-related protein Rab-14 OS=Heterocephalus glaber OX=10181 GN=RAB14 PE=4 SV=1                                               |
| <b>G5AZH3</b> | Cytoplasmic FMR1-interacting protein 1 (Fragment) OS=Heterocephalus glaber OX=10181 GN=GW7_18826 PE=4 SV=1                    |
| <b>G5C7M9</b> | Dynamin-3 (Fragment) OS=Heterocephalus glaber OX=10181 GN=GW7_06265 PE=3 SV=1                                                 |
| <b>G5BA56</b> | 1,4-alpha-glucan-branching enzyme OS=Heterocephalus glaber OX=10181 GN=GW7_07702 PE=4 SV=1                                    |
| <b>G5BPM1</b> | Alpha-2-macroglobulin OS=Heterocephalus glaber OX=10181 GN=GW7_17301 PE=4 SV=1                                                |
| <b>G5B1C5</b> | T-complex protein 1 subunit theta OS=Heterocephalus glaber OX=10181 GN=GW7_13214 PE=3 SV=1                                    |
| <b>G5BVL3</b> | 14-3-3 protein epsilon OS=Heterocephalus glaber OX=10181 GN=GW7_08232 PE=3 SV=1                                               |
| <b>G5C0K7</b> | Myelin basic protein OS=Heterocephalus glaber OX=10181 GN=GW7_03536 PE=4 SV=1                                                 |
| <b>G5C3N6</b> | Vacuolar protein sorting-associated protein 35 OS=Heterocephalus glaber OX=10181 GN=GW7_08700 PE=3 SV=1                       |
| <b>G5BI06</b> | Basement membrane-specific heparan sulfate proteoglycan core protein OS=Heterocephalus glaber OX=10181 GN=GW7_07516 PE=4 SV=1 |
| <b>G5CA17</b> | Septin-5 (Fragment) OS=Heterocephalus glaber OX=10181 GN=GW7_11135 PE=3 SV=1                                                  |
| <b>G5C3C3</b> | Tubulin beta chain OS=Heterocephalus glaber OX=10181 GN=GW7_04753 PE=3 SV=1                                                   |
| <b>G5BYD1</b> | Syntaxin-1B OS=Heterocephalus glaber OX=10181 GN=GW7_05131 PE=3 SV=1                                                          |
| <b>G5CAR8</b> | Gamma-enolase OS=Heterocephalus glaber OX=10181 GN=GW7_12127 PE=2 SV=1                                                        |
| <b>G5BYB7</b> | UPF0420 protein C16orf58 OS=Heterocephalus glaber OX=10181 GN=GW7_05117 PE=4 SV=1                                             |
| <b>G5AXH0</b> | Actin, gamma-enteric smooth muscle OS=Heterocephalus glaber OX=10181 GN=GW7_02888 PE=3 SV=1                                   |

|               |                                                                                                                                                                      |
|---------------|----------------------------------------------------------------------------------------------------------------------------------------------------------------------|
| <b>G5BSN2</b> | Phosphoglucomutase-1 OS=Heterocephalus glaber OX=10181 GN=GW7_01507 PE=4 SV=1                                                                                        |
| <b>G5AR38</b> | Endoplasmin (Fragment) OS=Heterocephalus glaber OX=10181 GN=GW7_10317 PE=3 SV=1                                                                                      |
| <b>G5AP01</b> | 14-3-3 protein zeta/delta OS=Heterocephalus glaber OX=10181 GN=GW7_00766 PE=3 SV=1                                                                                   |
| <b>G5B2A3</b> | Protein kinase C-binding protein NELL2 OS=Heterocephalus glaber OX=10181 GN=GW7_03965 PE=4 SV=1                                                                      |
| <b>G5BUH8</b> | Dynamin-2 OS=Heterocephalus glaber OX=10181 GN=GW7_13280 PE=3 SV=1                                                                                                   |
| <b>G5BKG1</b> | Mitogen-activated protein kinase OS=Heterocephalus glaber OX=10181 GN=GW7_15351 PE=4 SV=1                                                                            |
| <b>G5B2K8</b> | Phosphate carrier protein, mitochondrial OS=Heterocephalus glaber OX=10181 GN=GW7_08592 PE=3 SV=1                                                                    |
| <b>G5C8D3</b> | Elongation factor 1-alpha (Fragment) OS=Heterocephalus glaber OX=10181 GN=GW7_09733 PE=3 SV=1                                                                        |
| <b>G5BSI1</b> | Dynamin-1-like protein OS=Heterocephalus glaber OX=10181 GN=GW7_21637 PE=3 SV=1                                                                                      |
| <b>G5AVL7</b> | Cytochrome b-c1 complex subunit 1, mitochondrial OS=Heterocephalus glaber OX=10181 GN=UQCRC1 PE=4 SV=1                                                               |
| <b>G5C7R8</b> | Constitutive coactivator of peroxisome proliferator-activated receptor gamma OS=Heterocephalus glaber OX=10181 GN=GW7_11305 PE=4 SV=1                                |
| <b>G5BFK9</b> | Rab GDP dissociation inhibitor OS=Heterocephalus glaber OX=10181 GN=GW7_19328 PE=3 SV=1                                                                              |
| <b>G5C1L8</b> | Dihydrolipoyllysine-residue succinyltransferase component of 2-oxoglutarate dehydrogenase complex, mitochondrial OS=Heterocephalus glaber OX=10181 GN=DLST PE=4 SV=1 |
| <b>G5C530</b> | 6-phosphogluconate dehydrogenase, decarboxylating OS=Heterocephalus glaber OX=10181 GN=GW7_09120 PE=3 SV=1                                                           |
| <b>G5BWX1</b> | Ras-related protein Rab-1B OS=Heterocephalus glaber OX=10181 GN=RAB1B PE=4 SV=1                                                                                      |
| <b>G5AXV6</b> | ATP synthase subunit gamma OS=Heterocephalus glaber OX=10181 GN=GW7_14036 PE=3 SV=1                                                                                  |
| <b>G5BBV6</b> | 14-3-3 protein eta OS=Heterocephalus glaber OX=10181 GN=GW7_17673 PE=3 SV=1                                                                                          |
| <b>G5BTW5</b> | NADH dehydrogenase [ubiquinone] flavoprotein 1, mitochondrial OS=Heterocephalus glaber OX=10181 GN=NDUFV1 PE=3 SV=1                                                  |
| <b>G5B0J8</b> | V-type proton ATPase subunit a OS=Heterocephalus glaber OX=10181 GN=GW7_06851 PE=3 SV=1                                                                              |
| <b>G5AU37</b> | ADP-ribosylation factor 3 OS=Heterocephalus glaber OX=10181 GN=GW7_14469 PE=3 SV=1                                                                                   |
| <b>G5C1Y4</b> | T-complex protein 1 subunit delta OS=Heterocephalus glaber OX=10181 GN=GW7_01322 PE=3 SV=1                                                                           |
| <b>G5B251</b> | Heat shock cognate 71 kDa protein OS=Heterocephalus glaber OX=10181 GN=GW7_09579 PE=3 SV=1                                                                           |
| <b>G5B2V7</b> | 60 kDa heat shock protein, mitochondrial OS=Heterocephalus glaber OX=10181 GN=GW7_17339 PE=4 SV=1                                                                    |
| <b>G5BKW4</b> | Paraspeckle component 1 OS=Heterocephalus glaber OX=10181 GN=GW7_03914 PE=4 SV=1                                                                                     |
| <b>G5BE96</b> | Synaptojanin-1 (Fragment) OS=Heterocephalus glaber OX=10181 GN=GW7_08747 PE=4 SV=1                                                                                   |
| <b>G5C9G0</b> | Amino acid transporter OS=Heterocephalus glaber OX=10181 GN=GW7_08002 PE=3 SV=1                                                                                      |
| <b>G5ALK7</b> | Elongation factor 1-alpha OS=Heterocephalus glaber OX=10181 GN=GW7_12808 PE=3 SV=1                                                                                   |
| <b>G5C8G6</b> | Mitochondrial glutamate carrier 1 OS=Heterocephalus glaber OX=10181 GN=GW7_12706 PE=3 SV=1                                                                           |
| <b>G5B6P0</b> | Alpha-1,4 glucan phosphorylase OS=Heterocephalus glaber OX=10181 GN=GW7_20662 PE=3 SV=1                                                                              |
| <b>G5ASS3</b> | T-complex protein 1 subunit zeta isoform a OS=Heterocephalus glaber OX=10181 GN=CCT6A PE=3 SV=1                                                                      |
| <b>G5BAY8</b> | Lysine-specific demethylase 5C OS=Heterocephalus glaber OX=10181 GN=GW7_04947 PE=4 SV=1                                                                              |
| <b>G5C8M3</b> | Malate dehydrogenase OS=Heterocephalus glaber OX=10181 GN=GW7_04884 PE=3 SV=1                                                                                        |
| <b>G5B710</b> | T-complex protein 1 subunit epsilon OS=Heterocephalus glaber OX=10181 GN=GW7_03792 PE=3 SV=1                                                                         |
| <b>G5BZX7</b> | CaM kinase-like vesicle-associated protein OS=Heterocephalus glaber OX=10181 GN=GW7_19932 PE=4 SV=1                                                                  |
| <b>G5BWS7</b> | AP complex subunit beta OS=Heterocephalus glaber OX=10181 GN=GW7_21525 PE=3 SV=1                                                                                     |
| <b>G5C2C4</b> | Neuronal cell adhesion molecule (Fragment) OS=Heterocephalus glaber OX=10181 GN=GW7_15852 PE=4 SV=1                                                                  |
| <b>G5BF93</b> | Trimethyllysine dioxygenase, mitochondrial OS=Heterocephalus glaber OX=10181 GN=GW7_10776 PE=4 SV=1                                                                  |



|               |                                                                                                                                   |
|---------------|-----------------------------------------------------------------------------------------------------------------------------------|
| <b>G5BZ40</b> | Pyruvate dehydrogenase E1 component subunit alpha OS=Heterocephalus glaber OX=10181 GN=GW7_01970 PE=4 SV=1                        |
| <b>G5B840</b> | Band 4.1-like protein 1 OS=Heterocephalus glaber OX=10181 GN=GW7_21265 PE=4 SV=1                                                  |
| <b>G5CBK7</b> | Trifunctional enzyme subunit alpha, mitochondrial OS=Heterocephalus glaber OX=10181 GN=HADHA PE=3 SV=1                            |
| <b>G5CAR5</b> | Triosephosphate isomerase OS=Heterocephalus glaber OX=10181 GN=GW7_12124 PE=3 SV=1                                                |
| <b>G5B615</b> | V-type proton ATPase subunit H OS=Heterocephalus glaber OX=10181 GN=ATP6V1H PE=3 SV=1                                             |
| <b>G5C8M4</b> | UTP-glucose-1-phosphate uridylyltransferase OS=Heterocephalus glaber OX=10181 GN=GW7_04885 PE=3 SV=1                              |
| <b>G5C7U4</b> | T-complex protein 1 subunit beta OS=Heterocephalus glaber OX=10181 GN=GW7_11343 PE=3 SV=1                                         |
| <b>G5BXY1</b> | Hemoglobin subunit alpha OS=Heterocephalus glaber OX=10181 GN=HBA2 PE=3 SV=1                                                      |
| <b>G5BHY3</b> | PITH domain-containing protein (Fragment) OS=Heterocephalus glaber OX=10181 GN=GW7_07493 PE=4 SV=1                                |
| <b>G5AR92</b> | T-complex protein 1 subunit gamma (Fragment) OS=Heterocephalus glaber OX=10181 GN=GW7_14281 PE=3 SV=1                             |
| <b>G5BYW2</b> | Phenylalanyl-tRNA synthetase alpha chain OS=Heterocephalus glaber OX=10181 GN=GW7_16082 PE=4 SV=1                                 |
| <b>G5C7J1</b> | Voltage-dependent anion-selective channel protein 2 OS=Heterocephalus glaber OX=10181 GN=GW7_13179 PE=4 SV=1                      |
| <b>G5BQA9</b> | Serotransferrin OS=Heterocephalus glaber OX=10181 GN=GW7_05106 PE=3 SV=1                                                          |
| <b>G5B0L4</b> | ATP-citrate synthase OS=Heterocephalus glaber OX=10181 GN=GW7_06867 PE=3 SV=1                                                     |
| <b>G5AKS9</b> | Nitric oxide synthase, brain OS=Heterocephalus glaber OX=10181 GN=GW7_10175 PE=4 SV=1                                             |
| <b>G5B0N0</b> | Keratin, type I cytoskeletal 13 OS=Heterocephalus glaber OX=10181 GN=GW7_06883 PE=3 SV=1                                          |
| <b>G5BEC9</b> | Kinesin heavy chain isoform 5A OS=Heterocephalus glaber OX=10181 GN=KIF5A PE=3 SV=1                                               |
| <b>G5ALF6</b> | Phosphoglycerate kinase OS=Heterocephalus glaber OX=10181 GN=PGK1 PE=3 SV=1                                                       |
| <b>G5C773</b> | Band 4.1-like protein 2 OS=Heterocephalus glaber OX=10181 GN=GW7_21858 PE=4 SV=1                                                  |
| <b>G5B6W0</b> | Protein SCAI OS=Heterocephalus glaber OX=10181 GN=GW7_01139 PE=4 SV=1                                                             |
| <b>G5BLU3</b> | DnaJ-like protein subfamily C member 10 (Fragment) OS=Heterocephalus glaber OX=10181 GN=GW7_10932 PE=4 SV=1                       |
| <b>G5B382</b> | Synaptotagmin-2 OS=Heterocephalus glaber OX=10181 GN=GW7_12861 PE=4 SV=1                                                          |
| <b>G5BQX0</b> | AMP deaminase OS=Heterocephalus glaber OX=10181 GN=GW7_20134 PE=3 SV=1                                                            |
| <b>G5AYH2</b> | Elongation factor 1-gamma OS=Heterocephalus glaber OX=10181 GN=GW7_01766 PE=4 SV=1                                                |
| <b>G5BZY6</b> | Guanine nucleotide-binding protein G(i), alpha-2 subunit OS=Heterocephalus glaber OX=10181 GN=GW7_19941 PE=4 SV=1                 |
| <b>G5B928</b> | Calcium-transporting ATPase OS=Heterocephalus glaber OX=10181 GN=GW7_14600 PE=3 SV=1                                              |
| <b>G5BEK1</b> | 14-3-3 protein theta OS=Heterocephalus glaber OX=10181 GN=YWHAQ PE=3 SV=1                                                         |
| <b>G5CBJ9</b> | Dihydropyrimidinase-related protein 5 OS=Heterocephalus glaber OX=10181 GN=GW7_17031 PE=4 SV=1                                    |
| <b>G5BFL5</b> | Glucose-6-phosphate 1-dehydrogenase OS=Heterocephalus glaber OX=10181 GN=GW7_19334 PE=3 SV=1                                      |
| <b>G5BQU1</b> | Neural cell adhesion molecule L1 (Fragment) OS=Heterocephalus glaber OX=10181 GN=GW7_02026 PE=4 SV=1                              |
| <b>G5BSD0</b> | 4-aminobutyrate aminotransferase, mitochondrial (Fragment) OS=Heterocephalus glaber OX=10181 GN=GW7_08976 PE=3 SV=1               |
| <b>G5B2Y7</b> | WD repeat-containing protein 1 OS=Heterocephalus glaber OX=10181 GN=GW7_14537 PE=4 SV=1                                           |
| <b>G5B6J0</b> | Cofilin-1 OS=Heterocephalus glaber OX=10181 GN=GW7_20612 PE=3 SV=1                                                                |
| <b>G5BCQ6</b> | Transcriptional activator protein Pur-alpha OS=Heterocephalus glaber OX=10181 GN=GW7_08872 PE=4 SV=1                              |
| <b>G5C3R7</b> | Septin-2 OS=Heterocephalus glaber OX=10181 GN=GW7_11070 PE=3 SV=1                                                                 |
| <b>G5CAX4</b> | Heat shock cognate 71 kDa protein OS=Heterocephalus glaber OX=10181 GN=GW7_21369 PE=3 SV=1                                        |
| <b>G5C7W9</b> | Alpha-actinin-1 OS=Heterocephalus glaber OX=10181 GN=GW7_03701 PE=4 SV=1                                                          |
| <b>G5ALX2</b> | Catenin beta-1 OS=Heterocephalus glaber OX=10181 GN=GW7_09171 PE=4 SV=1                                                           |
| <b>G5ARZ9</b> | NADH dehydrogenase (Ubiquinone) 1 alpha subcomplex subunit 9, mitochondrial OS=Heterocephalus glaber OX=10181 GN=NDUFA9 PE=4 SV=1 |
| <b>G5BQX2</b> | Glutathione S-transferase OS=Heterocephalus glaber OX=10181 GN=GW7_20136 PE=3 SV=1                                                |

|               |                                                                                                                                       |
|---------------|---------------------------------------------------------------------------------------------------------------------------------------|
| <b>G5BXR0</b> | Acetyl-CoA acetyltransferase, mitochondrial OS=Heterocephalus glaber OX=10181 GN=GW7_19747 PE=3 SV=1                                  |
| <b>G5AKU7</b> | Aldehyde dehydrogenase, mitochondrial isoform 1 OS=Heterocephalus glaber OX=10181 GN=ALDH2 PE=3 SV=1                                  |
| <b>G5B4Q7</b> | Arf-GAP with SH3 domain, ANK repeat and PH domain-containing protein 1 OS=Heterocephalus glaber OX=10181 GN=GW7_10926 PE=4 SV=1       |
| <b>G5C873</b> | Neural cell adhesion molecule 2 OS=Heterocephalus glaber OX=10181 GN=GW7_07725 PE=4 SV=1                                              |
| <b>G5BJ37</b> | Keratin, type II cytoskeletal 79 OS=Heterocephalus glaber OX=10181 GN=GW7_10814 PE=3 SV=1                                             |
| <b>G5BBP4</b> | EF-hand calcium-binding protein 1 OS=Heterocephalus glaber OX=10181 GN=GW7_09364 PE=4 SV=1                                            |
| <b>G5BG59</b> | 14-3-3 protein gamma (Fragment) OS=Heterocephalus glaber OX=10181 GN=GW7_08877 PE=3 SV=1                                              |
| <b>G5B4U5</b> | Uncharacterized protein OS=Heterocephalus glaber OX=10181 GN=GW7_03212 PE=4 SV=1                                                      |
| <b>G5BRD7</b> | Sarcoplasmic/endoplasmic reticulum calcium ATPase 1 OS=Heterocephalus glaber OX=10181 GN=GW7_14894 PE=3 SV=1                          |
| <b>G5BET5</b> | ATP-dependent RNA helicase DDX1 OS=Heterocephalus glaber OX=10181 GN=GW7_19785 PE=4 SV=1                                              |
| <b>G5BPG8</b> | Succinate dehydrogenase [ubiquinone] flavoprotein subunit, mitochondrial OS=Heterocephalus glaber OX=10181 GN=GW7_14707 PE=3 SV=1     |
| <b>G5BCH1</b> | Alpha-adducin OS=Heterocephalus glaber OX=10181 GN=ADD1 PE=4 SV=1                                                                     |
| <b>G5BLD9</b> | Myelin proteolipid protein (Fragment) OS=Heterocephalus glaber OX=10181 GN=GW7_06253 PE=4 SV=1                                        |
| <b>G5BHA8</b> | ADP-ribosylation factor 5 OS=Heterocephalus glaber OX=10181 GN=GW7_16812 PE=3 SV=1                                                    |
| <b>G5AQD6</b> | 3,2-trans-enoyl-CoA isomerase, mitochondrial OS=Heterocephalus glaber OX=10181 GN=GW7_05021 PE=3 SV=1                                 |
| <b>G5BHI4</b> | NADH dehydrogenase [ubiquinone] 1 alpha subcomplex subunit 10, mitochondrial OS=Heterocephalus glaber OX=10181 GN=GW7_08787 PE=3 SV=1 |
| <b>G5BQX5</b> | Glutathione S-transferase OS=Heterocephalus glaber OX=10181 GN=GW7_20139 PE=3 SV=1                                                    |
| <b>G5C9N9</b> | Myotubularin (Fragment) OS=Heterocephalus glaber OX=10181 GN=GW7_05283 PE=4 SV=1                                                      |
| <b>G5BB78</b> | Citrate synthase (Fragment) OS=Heterocephalus glaber OX=10181 GN=GW7_15757 PE=3 SV=1                                                  |
| <b>G5AMA2</b> | NAD-dependent protein deacetylase OS=Heterocephalus glaber OX=10181 GN=GW7_16704 PE=3 SV=1                                            |
| <b>G5BGY3</b> | Phenylalanine--tRNA ligase beta subunit OS=Heterocephalus glaber OX=10181 GN=FARSB PE=4 SV=1                                          |
| <b>G5BLR5</b> | Fructose-bisphosphate aldolase A OS=Heterocephalus glaber OX=10181 GN=GW7_10395 PE=4 SV=1                                             |
| <b>G5BBE2</b> | Glutamate--cysteine ligase catalytic subunit (Fragment) OS=Heterocephalus glaber OX=10181 GN=GW7_06303 PE=4 SV=1                      |
| <b>G5BRK8</b> | Importin-7 OS=Heterocephalus glaber OX=10181 GN=GW7_21205 PE=4 SV=1                                                                   |
| <b>G5APK7</b> | Zinc transporter ZIP10 OS=Heterocephalus glaber OX=10181 GN=GW7_00937 PE=4 SV=1                                                       |
| <b>G5BDV3</b> | Rap1 GTPase-GDP dissociation stimulator 1 (Fragment) OS=Heterocephalus glaber OX=10181 GN=GW7_10113 PE=4 SV=1                         |
| <b>G5B5F3</b> | Vesicle-associated membrane protein 2 (Fragment) OS=Heterocephalus glaber OX=10181 GN=GW7_13855 PE=4 SV=1                             |
| <b>G5CBK9</b> | Ras-related protein Rab-10 OS=Heterocephalus glaber OX=10181 GN=GW7_17041 PE=4 SV=1                                                   |
| <b>G5C5T9</b> | Cytochrome c1, heme protein, mitochondrial OS=Heterocephalus glaber OX=10181 GN=GW7_19247 PE=4 SV=1                                   |
| <b>G5B0M4</b> | Keratin, type I cytoskeletal 17 OS=Heterocephalus glaber OX=10181 GN=GW7_06877 PE=3 SV=1                                              |
| <b>G5BPR0</b> | Neuronal-specific septin-3 (Fragment) OS=Heterocephalus glaber OX=10181 GN=GW7_19448 PE=3 SV=1                                        |
| <b>G5AM45</b> | Zinc transporter 1 OS=Heterocephalus glaber OX=10181 GN=GW7_16306 PE=4 SV=1                                                           |
| <b>G5AXT3</b> | Adenylyl cyclase-associated protein OS=Heterocephalus glaber OX=10181 GN=GW7_06940 PE=3 SV=1                                          |
| <b>G5C0C5</b> | Phosphoglycerate mutase OS=Heterocephalus glaber OX=10181 GN=GW7_09237 PE=3 SV=1                                                      |
| <b>G5AKJ4</b> | Aspartyl aminopeptidase OS=Heterocephalus glaber OX=10181 GN=DNPEP PE=3 SV=1                                                          |
| <b>G5BWW8</b> | Splicing factor 3B subunit 2 OS=Heterocephalus glaber OX=10181 GN=GW7_07186 PE=4 SV=1                                                 |
| <b>G5AMB0</b> | Alpha-actinin-4 OS=Heterocephalus glaber OX=10181 GN=GW7_16712 PE=4 SV=1                                                              |

|               |                                                                                                                                      |
|---------------|--------------------------------------------------------------------------------------------------------------------------------------|
| <b>G5BCG5</b> | Metabotropic glutamate receptor 4 OS=Heterocephalus glaber OX=10181 GN=GW7_15655 PE=3 SV=1                                           |
| <b>G5C8P9</b> | Lupus La protein OS=Heterocephalus glaber OX=10181 GN=SSB PE=4 SV=1                                                                  |
| <b>G5CAF3</b> | Sideroflexin-3 OS=Heterocephalus glaber OX=10181 GN=GW7_15882 PE=4 SV=1                                                              |
| <b>G5ATY3</b> | Anion exchange protein OS=Heterocephalus glaber OX=10181 GN=GW7_14415 PE=3 SV=1                                                      |
| <b>G5B2P2</b> | Heat shock protein 105 kDa OS=Heterocephalus glaber OX=10181 GN=GW7_02038 PE=3 SV=1                                                  |
| <b>G5AKF3</b> | Myelin-oligodendrocyte glycoprotein (Fragment) OS=Heterocephalus glaber OX=10181 GN=GW7_10279 PE=4 SV=1                              |
| <b>G5BCR1</b> | NAD(P) transhydrogenase, mitochondrial OS=Heterocephalus glaber OX=10181 GN=GW7_04058 PE=4 SV=1                                      |
| <b>G5BB30</b> | 14-3-3 protein beta/alpha OS=Heterocephalus glaber OX=10181 GN=YWHAB PE=3 SV=1                                                       |
| <b>G5ASQ2</b> | Septin-8 OS=Heterocephalus glaber OX=10181 GN=GW7_12246 PE=3 SV=1                                                                    |
| <b>G5BUK7</b> | Pyruvate dehydrogenase E1 component subunit beta OS=Heterocephalus glaber OX=10181 GN=PDHB PE=4 SV=1                                 |
| <b>G5BM50</b> | Microtubule-associated protein 1A OS=Heterocephalus glaber OX=10181 GN=GW7_18772 PE=4 SV=1                                           |
| <b>G5B7R5</b> | Formin-like protein 2 (Fragment) OS=Heterocephalus glaber OX=10181 GN=GW7_17977 PE=4 SV=1                                            |
| <b>G5ASH7</b> | Guanine deaminase OS=Heterocephalus glaber OX=10181 GN=GW7_07953 PE=3 SV=1                                                           |
| <b>G5AM26</b> | ATP synthase subunit O, mitochondrial OS=Heterocephalus glaber OX=10181 GN=GW7_16287 PE=3 SV=1                                       |
| <b>G5AQU8</b> | Ubiquitin-conjugating enzyme E2 O OS=Heterocephalus glaber OX=10181 GN=GW7_06422 PE=4 SV=1                                           |
| <b>G5BRF2</b> | Neuroplastin OS=Heterocephalus glaber OX=10181 GN=GW7_19526 PE=4 SV=1                                                                |
| <b>G5B3I7</b> | Ras-related protein Rab-5A OS=Heterocephalus glaber OX=10181 GN=RAB5A PE=4 SV=1                                                      |
| <b>G5C5Q2</b> | ELKS/RAB6-interacting/CAST family member 1 OS=Heterocephalus glaber OX=10181 GN=GW7_19210 PE=4 SV=1                                  |
| <b>G5AWZ4</b> | Coronin OS=Heterocephalus glaber OX=10181 GN=GW7_02143 PE=3 SV=1                                                                     |
| <b>G5AKP8</b> | Phosphatidylinositol-4-phosphate 5-kinase type-1 gamma (Fragment) OS=Heterocephalus glaber OX=10181 GN=GW7_11309 PE=4 SV=1           |
| <b>G5BJ39</b> | Keratin, type II cytoskeletal 8 OS=Heterocephalus glaber OX=10181 GN=GW7_10816 PE=2 SV=1                                             |
| <b>G5BZB8</b> | Elongation factor 2 OS=Heterocephalus glaber OX=10181 GN=EEF2 PE=4 SV=1                                                              |
| <b>G5BW10</b> | NADH dehydrogenase (Ubiquinone) iron-sulfur protein 2, mitochondrial isoform 1 OS=Heterocephalus glaber OX=10181 GN=NDUFS2 PE=3 SV=1 |
| <b>G5AXG2</b> | Dynactin subunit 1 OS=Heterocephalus glaber OX=10181 GN=GW7_02880 PE=4 SV=1                                                          |
| <b>G5C394</b> | Calcium/calmodulin-dependent protein kinase type II alpha chain OS=Heterocephalus glaber OX=10181 GN=GW7_00118 PE=4 SV=1             |
| <b>G5B558</b> | Putative RNA-binding protein Luc7-like 2 (Fragment) OS=Heterocephalus glaber OX=10181 GN=GW7_11834 PE=4 SV=1                         |
| <b>G5ALU1</b> | Regulating synaptic membrane exocytosis protein 1 OS=Heterocephalus glaber OX=10181 GN=GW7_17598 PE=4 SV=1                           |
| <b>G5AWA9</b> | Ras-related protein Rab-8B OS=Heterocephalus glaber OX=10181 GN=GW7_00144 PE=4 SV=1                                                  |
| <b>G5BDD6</b> | Small conductance calcium-activated potassium channel protein 3 OS=Heterocephalus glaber OX=10181 GN=GW7_05186 PE=4 SV=1             |
| <b>G5BY29</b> | Importin subunit beta-1 OS=Heterocephalus glaber OX=10181 GN=GW7_00453 PE=4 SV=1                                                     |
| <b>G5BJ97</b> | Fatty acid synthase OS=Heterocephalus glaber OX=10181 GN=GW7_04112 PE=4 SV=1                                                         |
| <b>G5BGK6</b> | Glutaminase kidney isoform, mitochondrial (Fragment) OS=Heterocephalus glaber OX=10181 GN=GW7_01412 PE=3 SV=1                        |
| <b>G5B521</b> | Malic enzyme (Fragment) OS=Heterocephalus glaber OX=10181 GN=GW7_17644 PE=3 SV=1                                                     |
| <b>G5CBQ4</b> | T-complex protein 1 subunit eta OS=Heterocephalus glaber OX=10181 GN=GW7_03296 PE=3 SV=1                                             |
| <b>G5C6C2</b> | Nucleoprotein TPR OS=Heterocephalus glaber OX=10181 GN=GW7_07103 PE=4 SV=1                                                           |
| <b>G5BAB4</b> | Constitutive coactivator of PPAR-gamma-like protein 2 OS=Heterocephalus glaber OX=10181 GN=GW7_01037 PE=4 SV=1                       |
| <b>G5BD70</b> | Adenosylhomocysteinase OS=Heterocephalus glaber OX=10181 GN=GW7_07805 PE=3 SV=1                                                      |
| <b>G5AL84</b> | Leucine-rich PPR motif-containing protein, mitochondrial (Fragment) OS=Heterocephalus glaber OX=10181 GN=GW7_03995 PE=4 SV=1         |
| <b>G5BJQ3</b> | ADP-ribosylation factor 3 OS=Heterocephalus glaber OX=10181 GN=GW7_19876 PE=3 SV=1                                                   |



|                                   |                                                                                                                          |
|-----------------------------------|--------------------------------------------------------------------------------------------------------------------------|
| <b>G5BN93</b>                     | Synaptic vesicle membrane protein VAT-1-like protein OS=Heterocephalus glaber OX=10181 GN=GW7_07847 PE=4 SV=1            |
| <b>G5BDP5</b>                     | Septin-8 OS=Heterocephalus glaber OX=10181 GN=GW7_11423 PE=3 SV=1                                                        |
| <b>G5B399</b>                     | Cysteine and glycine-rich protein 1 isoform 3 OS=Heterocephalus glaber OX=10181 GN=CSRP1 PE=4 SV=1                       |
| <b>G5BC67</b>                     | T-complex protein 1 subunit alpha OS=Heterocephalus glaber OX=10181 GN=GW7_11562 PE=3 SV=1                               |
| <b>G5BS07</b>                     | Dipeptidyl aminopeptidase-like protein 6 OS=Heterocephalus glaber OX=10181 GN=GW7_03940 PE=3 SV=1                        |
| <b>G5CB51</b>                     | Sodium/potassium-transporting ATPase subunit beta OS=Heterocephalus glaber OX=10181 GN=GW7_09541 PE=3 SV=1               |
| <b>G5C4P1</b>                     | Prohibitin OS=Heterocephalus glaber OX=10181 GN=GW7_21759 PE=4 SV=1                                                      |
| <b>G5BG31</b>                     | MICOS complex subunit MIC60 OS=Heterocephalus glaber OX=10181 GN=IMMT PE=3 SV=1                                          |
| <b>G5BB94</b>                     | Ras-related protein Rab-5B OS=Heterocephalus glaber OX=10181 GN=RAB5B PE=4 SV=1                                          |
| <b>G5BWN6</b>                     | V-type proton ATPase subunit E 1 isoform b OS=Heterocephalus glaber OX=10181 GN=ATP6V1E1 PE=3 SV=1                       |
| <b>G5AN56</b>                     | Very-long-chain (3R)-3-hydroxyacyl-CoA dehydratase (Fragment) OS=Heterocephalus glaber OX=10181 GN=GW7_19668 PE=3 SV=1   |
| <b>G5ALD6</b>                     | D-beta-hydroxybutyrate dehydrogenase, mitochondrial OS=Heterocephalus glaber OX=10181 GN=BDH1 PE=3 SV=1                  |
| <b>G5BCA6</b>                     | Dedicator of cytokinesis protein 4 (Fragment) OS=Heterocephalus glaber OX=10181 GN=GW7_16648 PE=3 SV=1                   |
| <b>G5BTQ7</b>                     | Succinate--CoA ligase [ADP-forming] subunit beta, mitochondrial OS=Heterocephalus glaber OX=10181 GN=SUCLA2 PE=3 SV=1    |
| <b>G5B1R3</b>                     | AP-3 complex subunit beta OS=Heterocephalus glaber OX=10181 GN=GW7_09432 PE=3 SV=1                                       |
| <b>G5BH50</b>                     | Profilin (Fragment) OS=Heterocephalus glaber OX=10181 GN=GW7_12907 PE=3 SV=1                                             |
| <b>G5CBF1</b>                     | Protein kinase C gamma type (Fragment) OS=Heterocephalus glaber OX=10181 GN=GW7_20162 PE=3 SV=1                          |
| <b>G5BXS3</b>                     | Ankyrin-3 OS=Heterocephalus glaber OX=10181 GN=GW7_01938 PE=4 SV=1                                                       |
| <b>G5C3G5</b>                     | Heat shock 70 kDa protein 1L OS=Heterocephalus glaber OX=10181 GN=GW7_04795 PE=3 SV=1                                    |
| <b>G5APR8</b>                     | BTB/POZ domain-containing protein KCTD16 OS=Heterocephalus glaber OX=10181 GN=GW7_01638 PE=4 SV=1                        |
| <b>G5BWU7</b>                     | Catenin alpha-2 (Fragment) OS=Heterocephalus glaber OX=10181 GN=GW7_19189 PE=4 SV=1                                      |
| <b>G5BG81</b>                     | Syntaxin-1A OS=Heterocephalus glaber OX=10181 GN=GW7_08899 PE=3 SV=1                                                     |
| <b>G5BJK0</b>                     | Synaptophysin OS=Heterocephalus glaber OX=10181 GN=GW7_20097 PE=4 SV=1                                                   |
| <b>G5B8J0</b>                     | Noelin (Fragment) OS=Heterocephalus glaber OX=10181 GN=GW7_14332 PE=4 SV=1                                               |
| <b>G5B5D5</b>                     | Sodium/potassium-transporting ATPase subunit beta OS=Heterocephalus glaber OX=10181 GN=GW7_13837 PE=3 SV=1               |
| <b>G5BFB4</b>                     | Dihydropyrimidinase-related protein 4 OS=Heterocephalus glaber OX=10181 GN=GW7_14070 PE=4 SV=1                           |
| <b>G5B7Q2</b>                     | Solute carrier family 12 member 5 OS=Heterocephalus glaber OX=10181 GN=GW7_06548 PE=4 SV=1                               |
| <b>G5BY03</b>                     | Neuronal membrane glycoprotein M6-a OS=Heterocephalus glaber OX=10181 GN=GW7_21848 PE=4 SV=1                             |
| <b>G5AQ71</b>                     | Kalirin (Fragment) OS=Heterocephalus glaber OX=10181 GN=GW7_10663 PE=4 SV=1                                              |
| <b>G5C4L3</b>                     | Nucleoside diphosphate kinase (Fragment) OS=Heterocephalus glaber OX=10181 GN=GW7_21798 PE=3 SV=1                        |
| <b>G5C289</b>                     | Microtubule-associated protein RP/EB family member 2 (Fragment) OS=Heterocephalus glaber OX=10181 GN=GW7_13100 PE=4 SV=1 |
| <b>G5APW6</b>                     | NipSnap-like protein 1 (Fragment) OS=Heterocephalus glaber OX=10181 GN=GW7_05309 PE=4 SV=1                               |
| <b>G5C2D5</b>                     | cAMP-dependent protein kinase type II-beta regulatory subunit OS=Heterocephalus glaber OX=10181 GN=PRKAR2B PE=4 SV=1     |
| <b>G5ARM9</b>                     | Heterogeneous nuclear ribonucleoprotein K OS=Heterocephalus glaber OX=10181 GN=HNRNPK PE=4 SV=1                          |
| <b>G5ARG8</b>                     | Heat shock 70 kDa protein 12A OS=Heterocephalus glaber OX=10181 GN=GW7_21295 PE=4 SV=1                                   |
| <b>2::tr G5AZE3 G5AZE3_HETG A</b> | Receptor-type tyrosine-protein phosphatase zeta OS=Heterocephalus glaber OX=10181 GN=GW7_13190 PE=4 SV=1                 |

|               |                                                                                                                                            |
|---------------|--------------------------------------------------------------------------------------------------------------------------------------------|
| <b>G5AY28</b> | Synaptotagmin-17 OS=Heterocephalus glaber OX=10181 GN=GW7_06689 PE=4 SV=1                                                                  |
| <b>G5AV02</b> | Glucocorticoid receptor DNA-binding factor 1 OS=Heterocephalus glaber OX=10181 GN=GW7_18127 PE=4 SV=1                                      |
| <b>G5BK64</b> | Phosphatidylinositol-5-phosphate 4-kinase type-2 beta (Fragment) OS=Heterocephalus glaber OX=10181 GN=GW7_13066 PE=4 SV=1                  |
| <b>G5B8E6</b> | F-actin-capping protein subunit alpha (Fragment) OS=Heterocephalus glaber OX=10181 GN=GW7_12267 PE=3 SV=1                                  |
| <b>G5B0K5</b> | Ras-related protein Rab-5C OS=Heterocephalus glaber OX=10181 GN=GW7_06858 PE=4 SV=1                                                        |
| <b>G5BH87</b> | Adenosylhomocysteinase (Fragment) OS=Heterocephalus glaber OX=10181 GN=GW7_16791 PE=3 SV=1                                                 |
| <b>G5BL29</b> | Fumarate hydratase, mitochondrial OS=Heterocephalus glaber OX=10181 GN=FH PE=3 SV=1                                                        |
| <b>G5BTZ8</b> | Heterogeneous nuclear ribonucleoprotein A3 OS=Heterocephalus glaber OX=10181 GN=GW7_13685 PE=4 SV=1                                        |
| <b>G5BX63</b> | NADH dehydrogenase (Ubiquinone) 1 beta subcomplex subunit 5, mitochondrial isoform 1 OS=Heterocephalus glaber OX=10181 GN=NDUFB5 PE=4 SV=1 |
| <b>G5C3T1</b> | Actin-related protein 3 OS=Heterocephalus glaber OX=10181 GN=GW7_07463 PE=3 SV=1                                                           |
| <b>G5C4V9</b> | Ras-related protein Rab-2A OS=Heterocephalus glaber OX=10181 GN=GW7_18515 PE=4 SV=1                                                        |
| <b>G5BTX3</b> | 14-3-3 protein eta OS=Heterocephalus glaber OX=10181 GN=GW7_17473 PE=3 SV=1                                                                |
| <b>G5B6T9</b> | Amphiphysin OS=Heterocephalus glaber OX=10181 GN=GW7_09869 PE=4 SV=1                                                                       |
| <b>G5B3J1</b> | Rab GDP dissociation inhibitor (Fragment) OS=Heterocephalus glaber OX=10181 GN=GW7_02321 PE=3 SV=1                                         |
| <b>G5AS76</b> | 40S ribosomal protein S3 OS=Heterocephalus glaber OX=10181 GN=RPS3 PE=3 SV=1                                                               |
| <b>G5BLW2</b> | Glutamate receptor 2 OS=Heterocephalus glaber OX=10181 GN=GW7_04537 PE=3 SV=1                                                              |
| <b>G5C4J2</b> | Glyceraldehyde-3-phosphate dehydrogenase OS=Heterocephalus glaber OX=10181 GN=GW7_21777 PE=4 SV=1                                          |
| <b>G5BVG8</b> | Succinate--CoA ligase [ADP/GDP-forming] subunit alpha, mitochondrial OS=Heterocephalus glaber OX=10181 GN=SUCLG1 PE=3 SV=1                 |
| <b>G5B4Y6</b> | Beta-adducin OS=Heterocephalus glaber OX=10181 GN=ADD2 PE=4 SV=1                                                                           |
| <b>G5BCT6</b> | Platelet-activating factor acetylhydrolase IB subunit alpha OS=Heterocephalus glaber OX=10181 GN=GW7_05075 PE=3 SV=1                       |
| <b>G5BPB2</b> | NADH dehydrogenase [ubiquinone] iron-sulfur protein 3, mitochondrial OS=Heterocephalus glaber OX=10181 GN=GW7_11265 PE=3 SV=1              |
| <b>G5AV13</b> | Sodium/calcium exchanger 2 OS=Heterocephalus glaber OX=10181 GN=GW7_18138 PE=3 SV=1                                                        |
| <b>G5BNX8</b> | ATP synthase subunit b, mitochondrial OS=Heterocephalus glaber OX=10181 GN=GW7_03064 PE=4 SV=1                                             |
| <b>G5B651</b> | ARF GTPase-activating protein GIT2 OS=Heterocephalus glaber OX=10181 GN=GW7_18931 PE=4 SV=1                                                |
| <b>G5AWL7</b> | Serine/threonine-protein phosphatase (Fragment) OS=Heterocephalus glaber OX=10181 GN=GW7_03093 PE=3 SV=1                                   |
| <b>G5AYJ7</b> | 4F2 cell-surface antigen heavy chain OS=Heterocephalus glaber OX=10181 GN=GW7_01791 PE=4 SV=1                                              |
| <b>G5C7Y3</b> | V-type proton ATPase subunit D OS=Heterocephalus glaber OX=10181 GN=ATP6V1D PE=4 SV=1                                                      |
| <b>G5BN12</b> | Serine/threonine-protein phosphatase OS=Heterocephalus glaber OX=10181 GN=PPP2CA PE=3 SV=1                                                 |
| <b>G5C7G8</b> | Serine/threonine-protein phosphatase OS=Heterocephalus glaber OX=10181 GN=GW7_13156 PE=3 SV=1                                              |
| <b>G5AL24</b> | Microtubule-associated protein OS=Heterocephalus glaber OX=10181 GN=GW7_13401 PE=4 SV=1                                                    |
| <b>G5BY58</b> | NADH dehydrogenase (Ubiquinone) 1 beta subcomplex subunit 10 OS=Heterocephalus glaber OX=10181 GN=NDUFB10 PE=4 SV=1                        |
| <b>G5BLA6</b> | Guanine nucleotide-binding protein G(Q) subunit alpha OS=Heterocephalus glaber OX=10181 GN=GW7_20311 PE=4 SV=1                             |
| <b>G5BL47</b> | Cytochrome b-c1 complex subunit Rieske, mitochondrial OS=Heterocephalus glaber OX=10181 GN=UQCRCF1 PE=4 SV=1                               |
| <b>G5BN01</b> | Protein RUFY3 OS=Heterocephalus glaber OX=10181 GN=GW7_20521 PE=4 SV=1                                                                     |
| <b>G5BEP8</b> | Tyrosine-protein phosphatase non-receptor type substrate 1 OS=Heterocephalus glaber OX=10181 GN=GW7_13443 PE=4 SV=1                        |
| <b>G5BRC3</b> | Coronin OS=Heterocephalus glaber OX=10181 GN=GW7_14880 PE=3 SV=1                                                                           |
| <b>G5AS68</b> | Phosphodiesterase OS=Heterocephalus glaber OX=10181 GN=GW7_02116 PE=3 SV=1                                                                 |

|               |                                                                                                                                    |
|---------------|------------------------------------------------------------------------------------------------------------------------------------|
| <b>G5APR2</b> | Cytosol aminopeptidase OS=Heterocephalus glaber OX=10181 GN=LAP3 PE=3 SV=1                                                         |
| <b>G5BIK6</b> | Calcium/calmodulin-dependent protein kinase type II beta chain OS=Heterocephalus glaber OX=10181 GN=GW7_08267 PE=4 SV=1            |
| <b>G5ASK0</b> | Proteasome subunit beta OS=Heterocephalus glaber OX=10181 GN=PSMB5 PE=3 SV=1                                                       |
| <b>G5C5U7</b> | Plectin-1 OS=Heterocephalus glaber OX=10181 GN=GW7_19255 PE=4 SV=1                                                                 |
| <b>G5BDS2</b> | Cerebellin-3 OS=Heterocephalus glaber OX=10181 GN=GW7_16489 PE=4 SV=1                                                              |
| <b>G5CBD1</b> | Beta-soluble NSF attachment protein OS=Heterocephalus glaber OX=10181 GN=GW7_00718 PE=4 SV=1                                       |
| <b>G5C2S9</b> | Heterogeneous nuclear ribonucleoprotein H2 OS=Heterocephalus glaber OX=10181 GN=GW7_14140 PE=4 SV=1                                |
| <b>G5ASA2</b> | Ras-related protein Rab-6A OS=Heterocephalus glaber OX=10181 GN=GW7_02105 PE=4 SV=1                                                |
| <b>G5B2N8</b> | Vacuolar protein sorting-associated protein 26B OS=Heterocephalus glaber OX=10181 GN=GW7_11540 PE=4 SV=1                           |
| <b>G5B8B7</b> | Clathrin coat assembly protein AP180 OS=Heterocephalus glaber OX=10181 GN=GW7_19308 PE=4 SV=1                                      |
| <b>G5CAH6</b> | Alpha-centractin OS=Heterocephalus glaber OX=10181 GN=ACTR1A PE=3 SV=1                                                             |
| <b>G5B5W3</b> | Alanyl-tRNA synthetase, cytoplasmic OS=Heterocephalus glaber OX=10181 GN=AARS PE=3 SV=1                                            |
| <b>G5BXJ3</b> | Myelin-associated glycoprotein isoform b OS=Heterocephalus glaber OX=10181 GN=MAG PE=4 SV=1                                        |
| <b>G5AV01</b> | AP complex subunit sigma OS=Heterocephalus glaber OX=10181 GN=GW7_18126 PE=3 SV=1                                                  |
| <b>G5BUW4</b> | 60S ribosomal protein L27a OS=Heterocephalus glaber OX=10181 GN=RPL27A PE=3 SV=1                                                   |
| <b>G5BA18</b> | CB1 cannabinoid receptor-interacting protein 1 OS=Heterocephalus glaber OX=10181 GN=GW7_02210 PE=4 SV=1                            |
| <b>G5CA61</b> | Four and a half LIM domains protein 1 OS=Heterocephalus glaber OX=10181 GN=GW7_15573 PE=4 SV=1                                     |
| <b>G5BJG1</b> | Cytochrome c oxidase subunit 4 isoform 1, mitochondrial OS=Heterocephalus glaber OX=10181 GN=GW7_12651 PE=4 SV=1                   |
| <b>G5B9Z4</b> | Importin subunit alpha OS=Heterocephalus glaber OX=10181 GN=GW7_05375 PE=3 SV=1                                                    |
| <b>G5B782</b> | 60S acidic ribosomal protein P0 OS=Heterocephalus glaber OX=10181 GN=RPLP0 PE=3 SV=1                                               |
| <b>G5BBE6</b> | CUG-BP-and ETR-3-like factor 2 (Fragment) OS=Heterocephalus glaber OX=10181 GN=GW7_19731 PE=4 SV=1                                 |
| <b>G5BTC4</b> | 26S proteasome non-ATPase regulatory subunit 2 OS=Heterocephalus glaber OX=10181 GN=GW7_17231 PE=3 SV=1                            |
| <b>G5AZR4</b> | Platelet-activating factor acetylhydrolase IB subunit gamma OS=Heterocephalus glaber OX=10181 GN=PAFAH1B3 PE=4 SV=1                |
| <b>G5ALN8</b> | Heterogeneous nuclear ribonucleoprotein D0 (Fragment) OS=Heterocephalus glaber OX=10181 GN=GW7_10606 PE=4 SV=1                     |
| <b>G5B230</b> | Intercellular adhesion molecule 5 OS=Heterocephalus glaber OX=10181 GN=GW7_08246 PE=4 SV=1                                         |
| <b>G5C3G6</b> | Heat shock 70 kDa protein 1B OS=Heterocephalus glaber OX=10181 GN=GW7_04796 PE=3 SV=1                                              |
| <b>G5B623</b> | Guanine nucleotide-binding protein G(Z) subunit alpha OS=Heterocephalus glaber OX=10181 GN=GW7_18903 PE=4 SV=1                     |
| <b>G5ATL5</b> | Phosphoinositide phospholipase C OS=Heterocephalus glaber OX=10181 GN=GW7_07363 PE=4 SV=1                                          |
| <b>G5BZ60</b> | Adenylyl cyclase-associated protein OS=Heterocephalus glaber OX=10181 GN=GW7_06073 PE=3 SV=1                                       |
| <b>G5C720</b> | Glycogen debranching enzyme OS=Heterocephalus glaber OX=10181 GN=GW7_08051 PE=4 SV=1                                               |
| <b>G5BQA1</b> | GTPase KRas isoform b OS=Heterocephalus glaber OX=10181 GN=KRAS PE=4 SV=1                                                          |
| <b>G5BUE2</b> | Proteasome subunit alpha type (Fragment) OS=Heterocephalus glaber OX=10181 GN=GW7_21362 PE=3 SV=1                                  |
| <b>G5C6E9</b> | Myotubularin OS=Heterocephalus glaber OX=10181 GN=GW7_05400 PE=4 SV=1                                                              |
| <b>G5BDX2</b> | Proteasome subunit alpha type OS=Heterocephalus glaber OX=10181 GN=PSMA7 PE=3 SV=1                                                 |
| <b>G5C1E9</b> | Leucine-rich repeat and calponin-like protein domain-containing protein 1 OS=Heterocephalus glaber OX=10181 GN=GW7_16595 PE=4 SV=1 |
| <b>G5ALG5</b> | U2-associated protein SR140 OS=Heterocephalus glaber OX=10181 GN=GW7_01159 PE=4 SV=1                                               |
| <b>G5B327</b> | Plexin-A1 OS=Heterocephalus glaber OX=10181 GN=GW7_03027 PE=4 SV=1                                                                 |
| <b>G5AYG1</b> | Cleavage and polyadenylation specificity factor subunit 7 OS=Heterocephalus glaber OX=10181 GN=GW7_01755 PE=4 SV=1                 |

|               |                                                                                                                                  |
|---------------|----------------------------------------------------------------------------------------------------------------------------------|
| <b>G5B9Q1</b> | Phytanoyl-CoA hydroxylase-interacting protein OS=Heterocephalus glaber OX=10181 GN=GW7_20727 PE=4 SV=1                           |
| <b>G5BZN6</b> | Succinate dehydrogenase [ubiquinone] iron-sulfur subunit, mitochondrial OS=Heterocephalus glaber OX=10181 GN=GW7_09699 PE=3 SV=1 |
| <b>G5C4R0</b> | Succinyl-CoA:3-ketoacid-coenzyme A transferase OS=Heterocephalus glaber OX=10181 GN=GW7_19761 PE=3 SV=1                          |
| <b>G5BX86</b> | Tubulin monoglycylase TTL3 OS=Heterocephalus glaber OX=10181 GN=GW7_19486 PE=4 SV=1                                              |
| <b>G5C662</b> | V-type proton ATPase subunit OS=Heterocephalus glaber OX=10181 GN=GW7_02358 PE=3 SV=1                                            |
| <b>G5BBH0</b> | Ras-related protein Rap-1b isoform 1 OS=Heterocephalus glaber OX=10181 GN=RAP1B PE=4 SV=1                                        |
| <b>G5BJU2</b> | Septin-4 (Fragment) OS=Heterocephalus glaber OX=10181 GN=GW7_05221 PE=3 SV=1                                                     |
| <b>G5CAD2</b> | Phosphatidylinositol-binding clathrin assembly protein OS=Heterocephalus glaber OX=10181 GN=GW7_14144 PE=4 SV=1                  |
| <b>G5BCG0</b> | Protein kinase C and casein kinase substrate in neurons protein 1 OS=Heterocephalus glaber OX=10181 GN=GW7_15650 PE=4 SV=1       |
| <b>G5C053</b> | Clathrin heavy chain OS=Heterocephalus glaber OX=10181 GN=GW7_01835 PE=3 SV=1                                                    |
| <b>G5CAR4</b> | Ubiquitin carboxyl-terminal hydrolase OS=Heterocephalus glaber OX=10181 GN=USP5 PE=3 SV=1                                        |
| <b>G5CBG2</b> | 40S ribosomal protein S9 OS=Heterocephalus glaber OX=10181 GN=RPS9 PE=3 SV=1                                                     |
| <b>G5BM53</b> | Protein disulfide-isomerase OS=Heterocephalus glaber OX=10181 GN=GW7_18775 PE=3 SV=1                                             |
| <b>G5B5J9</b> | Tyrosine--tRNA ligase OS=Heterocephalus glaber OX=10181 GN=GW7_11504 PE=3 SV=1                                                   |
| <b>G5B6P2</b> | Neurexin-2-alpha OS=Heterocephalus glaber OX=10181 GN=GW7_20664 PE=4 SV=1                                                        |
| <b>G5C7B5</b> | Calnexin OS=Heterocephalus glaber OX=10181 GN=GW7_16684 PE=3 SV=1                                                                |
| <b>G5BV64</b> | Protein kinase C beta type (Fragment) OS=Heterocephalus glaber OX=10181 GN=GW7_04700 PE=3 SV=1                                   |
| <b>G5B2L9</b> | Rogdi-like protein OS=Heterocephalus glaber OX=10181 GN=GW7_19978 PE=4 SV=1                                                      |
| <b>G5AT31</b> | Versican core protein (Fragment) OS=Heterocephalus glaber OX=10181 GN=GW7_17141 PE=4 SV=1                                        |
| <b>G5AN52</b> | Ras-related protein Rab-11A OS=Heterocephalus glaber OX=10181 GN=RAB11A PE=4 SV=1                                                |
| <b>G5AVA6</b> | Enoyl-CoA hydratase, mitochondrial OS=Heterocephalus glaber OX=10181 GN=GW7_07876 PE=3 SV=1                                      |
| <b>G5AZ44</b> | Putative cysteinyl-tRNA synthetase, mitochondrial OS=Heterocephalus glaber OX=10181 GN=GW7_00286 PE=3 SV=1                       |
| <b>G5BUU3</b> | Mitochondrial import receptor subunit TOM70 OS=Heterocephalus glaber OX=10181 GN=GW7_21055 PE=4 SV=1                             |
| <b>G5BLB9</b> | Phytanoyl-CoA hydroxylase-interacting protein-like isoform 1 OS=Heterocephalus glaber OX=10181 GN=PHYHIPL PE=4 SV=1              |
| <b>G5CBK6</b> | Trifunctional enzyme subunit beta, mitochondrial OS=Heterocephalus glaber OX=10181 GN=GW7_17038 PE=3 SV=1                        |
| <b>G5AKI4</b> | Anion exchange protein OS=Heterocephalus glaber OX=10181 GN=GW7_07264 PE=3 SV=1                                                  |
| <b>G5BT43</b> | Voltage-dependent anion-selective channel protein 3 isoform 2 OS=Heterocephalus glaber OX=10181 GN=VDAC3 PE=4 SV=1               |
| <b>G5AU15</b> | Pre-mRNA-processing factor 40-like protein B OS=Heterocephalus glaber OX=10181 GN=GW7_14447 PE=4 SV=1                            |
| <b>G5BEG5</b> | N-acylneuraminate cytidyllyltransferase OS=Heterocephalus glaber OX=10181 GN=GW7_05662 PE=4 SV=1                                 |
| <b>G5AQT3</b> | Septin-9 (Fragment) OS=Heterocephalus glaber OX=10181 GN=GW7_06407 PE=3 SV=1                                                     |
| <b>G5C1G0</b> | Guanine nucleotide-binding protein subunit beta-4 (Fragment) OS=Heterocephalus glaber OX=10181 GN=GW7_14113 PE=4 SV=1            |
| <b>G5BF08</b> | Homer protein-like protein 2 OS=Heterocephalus glaber OX=10181 GN=GW7_13593 PE=4 SV=1                                            |
| <b>G5AR83</b> | Brevican core protein OS=Heterocephalus glaber OX=10181 GN=GW7_14272 PE=4 SV=1                                                   |
| <b>G5BF97</b> | DNA topoisomerase 2-beta OS=Heterocephalus glaber OX=10181 GN=GW7_15047 PE=4 SV=1                                                |
| <b>G5B9C3</b> | Stromal interaction molecule 1 (Fragment) OS=Heterocephalus glaber OX=10181 GN=GW7_12631 PE=4 SV=1                               |
| <b>G5B5Y3</b> | 40S ribosomal protein S4 OS=Heterocephalus glaber OX=10181 GN=GW7_15480 PE=3 SV=1                                                |
| <b>G5CAJ1</b> | Up-regulated during skeletal muscle growth protein 5 OS=Heterocephalus glaber OX=10181 GN=GW7_15920 PE=4 SV=1                    |
| <b>G5AV28</b> | Synaptic vesicle glycoprotein 2B OS=Heterocephalus glaber OX=10181 GN=GW7_05778 PE=4 SV=1                                        |

|               |                                                                                                                                   |
|---------------|-----------------------------------------------------------------------------------------------------------------------------------|
| <b>G5BAI1</b> | IQ motif and SEC7 domain-containing protein 1 OS=Heterocephalus glaber OX=10181 GN=GW7_02159 PE=4 SV=1                            |
| <b>G5BLN1</b> | Atlastin-1 (Fragment) OS=Heterocephalus glaber OX=10181 GN=GW7_00228 PE=4 SV=1                                                    |
| <b>G5AXV0</b> | Catalase OS=Heterocephalus glaber OX=10181 GN=GW7_08865 PE=3 SV=1                                                                 |
| <b>G5BBP0</b> | 2,4-dienoyl-CoA reductase, mitochondrial OS=Heterocephalus glaber OX=10181 GN=GW7_09360 PE=4 SV=1                                 |
| <b>G5B890</b> | 60S ribosomal protein L18 OS=Heterocephalus glaber OX=10181 GN=GW7_05359 PE=4 SV=1                                                |
| <b>G5AXI1</b> | Dual specificity tyrosine-phosphorylation-regulated kinase 1A (Fragment) OS=Heterocephalus glaber OX=10181 GN=GW7_17149 PE=4 SV=1 |
| <b>G5BK72</b> | Creatine kinase S-type, mitochondrial OS=Heterocephalus glaber OX=10181 GN=GW7_10879 PE=3 SV=1                                    |
| <b>G5AUK3</b> | Proteasome subunit alpha type (Fragment) OS=Heterocephalus glaber OX=10181 GN=GW7_10861 PE=3 SV=1                                 |
| <b>G5C077</b> | AFG3-like protein 2 (Fragment) OS=Heterocephalus glaber OX=10181 GN=GW7_12057 PE=3 SV=1                                           |
| <b>G5BQW4</b> | Proteasome subunit alpha type OS=Heterocephalus glaber OX=10181 GN=PSMA5 PE=3 SV=1                                                |
| <b>G5BRL1</b> | Switch-associated protein 70 OS=Heterocephalus glaber OX=10181 GN=SWAP70 PE=4 SV=1                                                |
| <b>G5BJ78</b> | Rho GDP-dissociation inhibitor 1 OS=Heterocephalus glaber OX=10181 GN=ARHGDI1 PE=4 SV=1                                           |
| <b>G5B9K1</b> | Putative ubiquitin carboxyl-terminal hydrolase FAF-X OS=Heterocephalus glaber OX=10181 GN=GW7_04024 PE=3 SV=1                     |
| <b>G5B371</b> | Liprin-alpha-4 OS=Heterocephalus glaber OX=10181 GN=GW7_12850 PE=4 SV=1                                                           |
| <b>G5BII7</b> | Dolichyl-diphosphooligosaccharide--protein glycosyltransferase subunit 1 OS=Heterocephalus glaber OX=10181 GN=GW7_10957 PE=3 SV=1 |
| <b>G5C5Z1</b> | Amino acid transporter OS=Heterocephalus glaber OX=10181 GN=GW7_18352 PE=3 SV=1                                                   |
| <b>G5BFV5</b> | Heterogeneous nuclear ribonucleoproteins C1/C2 OS=Heterocephalus glaber OX=10181 GN=GW7_08510 PE=4 SV=1                           |
| <b>G5C9Y1</b> | Phospholipase D3 OS=Heterocephalus glaber OX=10181 GN=GW7_03571 PE=4 SV=1                                                         |
| <b>G5BH20</b> | Histone H2B OS=Heterocephalus glaber OX=10181 GN=GW7_05783 PE=3 SV=1                                                              |
| <b>G5BZ00</b> | Zinc transporter 3 OS=Heterocephalus glaber OX=10181 GN=GW7_14384 PE=4 SV=1                                                       |
| <b>G5BH46</b> | Transmembrane protein 65 (Fragment) OS=Heterocephalus glaber OX=10181 GN=GW7_05809 PE=4 SV=1                                      |
| <b>G5AX60</b> | Peroxisomal multifunctional enzyme type 2 OS=Heterocephalus glaber OX=10181 GN=GW7_07527 PE=4 SV=1                                |
| <b>G5BIL3</b> | Peptidyl-prolyl cis-trans isomerase OS=Heterocephalus glaber OX=10181 GN=PPIA PE=3 SV=1                                           |
| <b>G5AN45</b> | NADH dehydrogenase [ubiquinone] 1 alpha subcomplex subunit 13 OS=Heterocephalus glaber OX=10181 GN=GW7_05858 PE=4 SV=1            |
| <b>G5BAR1</b> | Cytosolic non-specific dipeptidase OS=Heterocephalus glaber OX=10181 GN=GW7_18554 PE=4 SV=1                                       |
| <b>G5BID1</b> | Phosphodiesterase OS=Heterocephalus glaber OX=10181 GN=PDE1B PE=3 SV=1                                                            |
| <b>G5AZ20</b> | Gamma-aminobutyric acid type B receptor subunit 2 OS=Heterocephalus glaber OX=10181 GN=GW7_05037 PE=3 SV=1                        |
| <b>G5AQ32</b> | 4-trimethylaminobutyraldehyde dehydrogenase OS=Heterocephalus glaber OX=10181 GN=ALDH9A1 PE=3 SV=1                                |
| <b>G5ATC2</b> | Rho GTPase-activating protein 1 OS=Heterocephalus glaber OX=10181 GN=GW7_01178 PE=4 SV=1                                          |
| <b>G5C1J8</b> | Neurexin-1-alpha OS=Heterocephalus glaber OX=10181 GN=GW7_16388 PE=4 SV=1                                                         |
| <b>G5AQN1</b> | COP9 signalosome complex subunit 5 OS=Heterocephalus glaber OX=10181 GN=COP55 PE=4 SV=1                                           |
| <b>G5BWQ7</b> | High affinity copper uptake protein 1 OS=Heterocephalus glaber OX=10181 GN=GW7_09545 PE=4 SV=1                                    |
| <b>G5BYY8</b> | Microtubule-associated protein RP/EB family member 3 OS=Heterocephalus glaber OX=10181 GN=MAPRE3 PE=4 SV=1                        |
| <b>G5BL96</b> | Keratin, type II cytoskeletal 7 OS=Heterocephalus glaber OX=10181 GN=GW7_04045 PE=3 SV=1                                          |
| <b>G5BZL6</b> | Aflatoxin B1 aldehyde reductase member 2 OS=Heterocephalus glaber OX=10181 GN=GW7_09679 PE=4 SV=1                                 |
| <b>G5C9N0</b> | DNA topoisomerase I (Fragment) OS=Heterocephalus glaber OX=10181 GN=GW7_18071 PE=3 SV=1                                           |
| <b>G5B5Y6</b> | Lysine--tRNA ligase OS=Heterocephalus glaber OX=10181 GN=KARS PE=3 SV=1                                                           |



|                |                                                                                                                                       |
|----------------|---------------------------------------------------------------------------------------------------------------------------------------|
| <b>G5BHZ1</b>  | Heterogeneous nuclear ribonucleoprotein R OS=Heterocephalus glaber OX=10181 GN=GW7_07501 PE=4 SV=1                                    |
| <b>G5BPT7</b>  | Adenosylhomocysteinase OS=Heterocephalus glaber OX=10181 GN=AHCY PE=3 SV=1                                                            |
| <b>G5AKZ3</b>  | Guanine nucleotide-binding protein G(S) subunit alpha isoforms XLas OS=Heterocephalus glaber OX=10181 GN=GW7_08852 PE=4 SV=1          |
| <b>G5B8C9</b>  | OCIA domain-containing protein 2 (Fragment) OS=Heterocephalus glaber OX=10181 GN=GW7_00862 PE=4 SV=1                                  |
| <b>G5ASC5</b>  | Carnitine O-acetyltransferase isoform 1 OS=Heterocephalus glaber OX=10181 GN=CRAT PE=3 SV=1                                           |
| <b>G5BKZ8</b>  | Talin-1 OS=Heterocephalus glaber OX=10181 GN=GW7_10700 PE=4 SV=1                                                                      |
| <b>G5CAI7</b>  | Cytosolic purine 5'-nucleotidase OS=Heterocephalus glaber OX=10181 GN=GW7_15916 PE=4 SV=1                                             |
| <b>G5C5B6</b>  | Homer protein-like protein 3 OS=Heterocephalus glaber OX=10181 GN=GW7_11673 PE=4 SV=1                                                 |
| <b>G5C5Z4</b>  | Actin-related protein 2 OS=Heterocephalus glaber OX=10181 GN=GW7_18355 PE=3 SV=1                                                      |
| <b>G5BLW4</b>  | Retinal dehydrogenase 1 (Fragment) OS=Heterocephalus glaber OX=10181 GN=GW7_02633 PE=3 SV=1                                           |
| <b>G5AQH6</b>  | Solute carrier family 2, facilitated glucose transporter member 1 (Fragment) OS=Heterocephalus glaber OX=10181 GN=GW7_04364 PE=3 SV=1 |
| <b>G5BPY0</b>  | Sidoreflexin OS=Heterocephalus glaber OX=10181 GN=SFXN1 PE=3 SV=1                                                                     |
| <b>G5AY95</b>  | NADH dehydrogenase (Ubiquinone) 1 beta subcomplex subunit 9 OS=Heterocephalus glaber OX=10181 GN=NDUFB9 PE=3 SV=1                     |
| <b>G5B6G5</b>  | Reticulon OS=Heterocephalus glaber OX=10181 GN=GW7_20694 PE=4 SV=1                                                                    |
| <b>G5CBM7</b>  | Apolipoprotein E OS=Heterocephalus glaber OX=10181 GN=GW7_18161 PE=2 SV=1                                                             |
| <b>G5C705</b>  | Leucine-rich glioma-inactivated protein 1 OS=Heterocephalus glaber OX=10181 GN=LGI1 PE=4 SV=1                                         |
| <b>G5BYW3</b>  | Glutaryl-CoA dehydrogenase, mitochondrial OS=Heterocephalus glaber OX=10181 GN=GW7_16083 PE=3 SV=1                                    |
| <b>2G5BK14</b> | Cell division control protein 42-like protein OS=Heterocephalus glaber OX=10181 GN=GW7_09970 PE=4 SV=1                                |
| <b>G5BLW6</b>  | Retinal dehydrogenase 1 OS=Heterocephalus glaber OX=10181 GN=GW7_02635 PE=3 SV=1                                                      |
| <b>G5B6W3</b>  | 60S ribosomal protein L35 OS=Heterocephalus glaber OX=10181 GN=RPL35 PE=3 SV=1                                                        |
| <b>G5ASS1</b>  | NipSnap-like protein 2 (Fragment) OS=Heterocephalus glaber OX=10181 GN=GW7_14812 PE=4 SV=1                                            |
| <b>G5BIN6</b>  | Synaptic vesicle membrane protein VAT-1-like protein (Fragment) OS=Heterocephalus glaber OX=10181 GN=GW7_16839 PE=4 SV=1              |
| <b>G5BSN9</b>  | Putative tyrosine-protein phosphatase auxilin OS=Heterocephalus glaber OX=10181 GN=GW7_01514 PE=4 SV=1                                |
| <b>G5BJS5</b>  | Aquaporin-4 OS=Heterocephalus glaber OX=10181 GN=GW7_07902 PE=3 SV=1                                                                  |
| <b>G5BQT6</b>  | B-cell receptor-associated protein 31 OS=Heterocephalus glaber OX=10181 GN=GW7_02021 PE=4 SV=1                                        |
| <b>G5BCJ5</b>  | Uncharacterized protein OS=Heterocephalus glaber OX=10181 GN=GW7_18963 PE=4 SV=1                                                      |
| <b>G5ATW7</b>  | Carbonic anhydrase 2 (Fragment) OS=Heterocephalus glaber OX=10181 GN=GW7_14399 PE=4 SV=1                                              |
| <b>G5BAZ8</b>  | Zinc transporter SLC39A7 OS=Heterocephalus glaber OX=10181 GN=SLC39A7 PE=4 SV=1                                                       |
| <b>G5BKB7</b>  | Gamma-adducin OS=Heterocephalus glaber OX=10181 GN=GW7_14624 PE=4 SV=1                                                                |
| <b>G5AQ50</b>  | 60 kDa heat shock protein, mitochondrial OS=Heterocephalus glaber OX=10181 GN=GW7_10597 PE=4 SV=1                                     |
| <b>G5ATA4</b>  | Collagen alpha-1(XVIII) chain OS=Heterocephalus glaber OX=10181 GN=GW7_13728 PE=4 SV=1                                                |
| <b>G5B5C8</b>  | Eukaryotic initiation factor 4A-I OS=Heterocephalus glaber OX=10181 GN=GW7_13830 PE=3 SV=1                                            |
| <b>G5AR57</b>  | NADH dehydrogenase [ubiquinone] 1 alpha subcomplex subunit 2 (Fragment) OS=Heterocephalus glaber OX=10181 GN=GW7_12539 PE=4 SV=1      |
| <b>G5BLQ4</b>  | Oxysterol-binding protein OS=Heterocephalus glaber OX=10181 GN=GW7_09395 PE=3 SV=1                                                    |
| <b>G5C0T9</b>  | NADH dehydrogenase [ubiquinone] 1 alpha subcomplex subunit 12 OS=Heterocephalus glaber OX=10181 GN=NDUFA12 PE=3 SV=1                  |
| <b>G5BT86</b>  | Kininogen-1 OS=Heterocephalus glaber OX=10181 GN=KNG1 PE=4 SV=1                                                                       |
| <b>G5AQL0</b>  | Hydroxyacyl-coenzyme A dehydrogenase, mitochondrial OS=Heterocephalus glaber OX=10181 GN=GW7_17857 PE=4 SV=1                          |

|               |                                                                                                                             |
|---------------|-----------------------------------------------------------------------------------------------------------------------------|
| <b>G5BY67</b> | 28S ribosomal protein S34, mitochondrial OS=Heterocephalus glaber OX=10181 GN=GW7_05752 PE=4 SV=1                           |
| <b>G5BYT3</b> | cAMP-dependent protein kinase catalytic subunit alpha OS=Heterocephalus glaber OX=10181 GN=GW7_16053 PE=3 SV=1              |
| <b>G5C2R7</b> | Methyl-CpG-binding protein 2 OS=Heterocephalus glaber OX=10181 GN=GW7_13707 PE=4 SV=1                                       |
| <b>G5BML0</b> | Pleiotropic regulator 1 OS=Heterocephalus glaber OX=10181 GN=GW7_21603 PE=4 SV=1                                            |
| <b>G5BY35</b> | p130Cas-associated protein OS=Heterocephalus glaber OX=10181 GN=GW7_00459 PE=4 SV=1                                         |
| <b>G5B2A2</b> | Copine-6 OS=Heterocephalus glaber OX=10181 GN=GW7_11974 PE=4 SV=1                                                           |
| <b>G5AN82</b> | Dual specificity mitogen-activated protein kinase kinase 1 OS=Heterocephalus glaber OX=10181 GN=GW7_19660 PE=3 SV=1         |
| <b>G5BJV7</b> | Adipocyte plasma membrane-associated protein OS=Heterocephalus glaber OX=10181 GN=APMAP PE=4 SV=1                           |
| <b>G5BSC6</b> | Ubiquitin carboxyl-terminal hydrolase 7 OS=Heterocephalus glaber OX=10181 GN=GW7_08972 PE=3 SV=1                            |
| <b>G5BLB3</b> | CDGSH iron sulfur domain-containing protein 1 OS=Heterocephalus glaber OX=10181 GN=GW7_01960 PE=4 SV=1                      |
| <b>G5BYS2</b> | NADH dehydrogenase [ubiquinone] 1 beta subcomplex subunit 7 OS=Heterocephalus glaber OX=10181 GN=GW7_16042 PE=4 SV=1        |
| <b>G5CBQ7</b> | Sideroflexin-5 OS=Heterocephalus glaber OX=10181 GN=GW7_03299 PE=4 SV=1                                                     |
| <b>G5AKY1</b> | Neuronal membrane glycoprotein M6-b OS=Heterocephalus glaber OX=10181 GN=GW7_16652 PE=4 SV=1                                |
| <b>G5BDJ8</b> | WD repeat-containing protein 68 OS=Heterocephalus glaber OX=10181 GN=GW7_17461 PE=4 SV=1                                    |
| <b>G5BI03</b> | Cell division control protein 42-like protein OS=Heterocephalus glaber OX=10181 GN=GW7_07513 PE=4 SV=1                      |
| <b>G5C350</b> | Importin-5 OS=Heterocephalus glaber OX=10181 GN=GW7_12714 PE=4 SV=1                                                         |
| <b>G5BRW3</b> | Ribosomal protein L19 OS=Heterocephalus glaber OX=10181 GN=GW7_09589 PE=3 SV=1                                              |
| <b>G5C9W7</b> | Ras-related protein Rab-4B (Fragment) OS=Heterocephalus glaber OX=10181 GN=GW7_03557 PE=4 SV=1                              |
| <b>G5ASV2</b> | Nucleolin OS=Heterocephalus glaber OX=10181 GN=GW7_10373 PE=4 SV=1                                                          |
| <b>G5AKW2</b> | RasGAP-activating-like protein 1 OS=Heterocephalus glaber OX=10181 GN=GW7_10151 PE=4 SV=1                                   |
| <b>G5B6U4</b> | Ras-related protein Ral-A OS=Heterocephalus glaber OX=10181 GN=RALA PE=4 SV=1                                               |
| <b>G5C0D0</b> | Neuronal cell adhesion molecule OS=Heterocephalus glaber OX=10181 GN=GW7_06596 PE=4 SV=1                                    |
| <b>G5BMR5</b> | Guanine nucleotide-binding protein G(O) subunit alpha OS=Heterocephalus glaber OX=10181 GN=GW7_09345 PE=4 SV=1              |
| <b>G5B6W7</b> | Proteasome subunit beta OS=Heterocephalus glaber OX=10181 GN=GW7_01146 PE=3 SV=1                                            |
| <b>G5AU14</b> | Formin-like protein 3 OS=Heterocephalus glaber OX=10181 GN=GW7_14446 PE=4 SV=1                                              |
| <b>G5BZP0</b> | Phosphoacetylglucosamine mutase OS=Heterocephalus glaber OX=10181 GN=GW7_08293 PE=3 SV=1                                    |
| <b>G5BK63</b> | Proteasome subunit beta OS=Heterocephalus glaber OX=10181 GN=GW7_13065 PE=3 SV=1                                            |
| <b>G5B389</b> | Endothelin B receptor-like protein 2 OS=Heterocephalus glaber OX=10181 GN=GW7_12868 PE=4 SV=1                               |
| <b>G5C2E8</b> | Tetraspanin OS=Heterocephalus glaber OX=10181 GN=GW7_00385 PE=3 SV=1                                                        |
| <b>G5BMX3</b> | Myosin-XV OS=Heterocephalus glaber OX=10181 GN=GW7_07656 PE=3 SV=1                                                          |
| <b>G5C351</b> | FERM, RhoGEF and pleckstrin domain-containing protein 1 (Fragment) OS=Heterocephalus glaber OX=10181 GN=GW7_12715 PE=4 SV=1 |
| <b>G5BS94</b> | Glutathione S-transferase P OS=Heterocephalus glaber OX=10181 GN=GW7_14677 PE=3 SV=1                                        |
| <b>G5B117</b> | Proteasome subunit alpha type OS=Heterocephalus glaber OX=10181 GN=GW7_14185 PE=3 SV=1                                      |
| <b>G5C384</b> | Pre-mRNA branch site protein p14 OS=Heterocephalus glaber OX=10181 GN=GW7_13983 PE=4 SV=1                                   |
| <b>G5BY52</b> | Synaptogyrin-3 (Fragment) OS=Heterocephalus glaber OX=10181 GN=GW7_05737 PE=4 SV=1                                          |
| <b>G5AK81</b> | Anion exchange protein (Fragment) OS=Heterocephalus glaber OX=10181 GN=GW7_08981 PE=3 SV=1                                  |
| <b>G5AWP7</b> | GTP-binding nuclear protein Ran (Fragment) OS=Heterocephalus glaber OX=10181 GN=GW7_03170 PE=3 SV=1                         |
| <b>G5BSE8</b> | Histone H2A OS=Heterocephalus glaber OX=10181 GN=GW7_09999 PE=3 SV=1                                                        |

|               |                                                                                                                                   |
|---------------|-----------------------------------------------------------------------------------------------------------------------------------|
| <b>G5C226</b> | Sodium-and chloride-dependent GABA transporter 3 OS=Heterocephalus glaber OX=10181 GN=GW7_20151 PE=4 SV=1                         |
| <b>G5B211</b> | 28S ribosomal protein S27, mitochondrial (Fragment) OS=Heterocephalus glaber OX=10181 GN=GW7_19014 PE=4 SV=1                      |
| <b>G5BNW3</b> | Rho-related GTP-binding protein RhoC OS=Heterocephalus glaber OX=10181 GN=GW7_03049 PE=4 SV=1                                     |
| <b>G5BG13</b> | 6-phosphofructokinase, liver type OS=Heterocephalus glaber OX=10181 GN=GW7_06815 PE=4 SV=1                                        |
| <b>G5B6E8</b> | Isocitrate dehydrogenase [NADP] OS=Heterocephalus glaber OX=10181 GN=IDH1 PE=3 SV=1                                               |
| <b>G5BQT9</b> | Isocitrate dehydrogenase [NAD] subunit, mitochondrial OS=Heterocephalus glaber OX=10181 GN=GW7_02024 PE=3 SV=1                    |
| <b>G5BVV5</b> | Eukaryotic translation initiation factor 3 subunit A OS=Heterocephalus glaber OX=10181 GN=EIF3A PE=3 SV=1                         |
| <b>G5AVX4</b> | Phosphatidylinositol-5-phosphate 4-kinase type-2 alpha OS=Heterocephalus glaber OX=10181 GN=GW7_05903 PE=4 SV=1                   |
| <b>G5BCB4</b> | Annexin OS=Heterocephalus glaber OX=10181 GN=GW7_14853 PE=3 SV=1                                                                  |
| <b>G5BRM9</b> | Glycyl-tRNA synthetase OS=Heterocephalus glaber OX=10181 GN=GW7_21726 PE=4 SV=1                                                   |
| <b>G5BX33</b> | Heat shock protein HSP 90-alpha 1 OS=Heterocephalus glaber OX=10181 GN=GW7_11862 PE=4 SV=1                                        |
| <b>G5B8W2</b> | Reticulon (Fragment) OS=Heterocephalus glaber OX=10181 GN=GW7_15257 PE=4 SV=1                                                     |
| <b>G5BCL0</b> | ATP synthase subunit e, mitochondrial OS=Heterocephalus glaber OX=10181 GN=GW7_18978 PE=4 SV=1                                    |
| <b>G5C8J0</b> | Netrin-G1 ligand OS=Heterocephalus glaber OX=10181 GN=GW7_15729 PE=4 SV=1                                                         |
| <b>G5BD34</b> | C-4 methylsterol oxidase OS=Heterocephalus glaber OX=10181 GN=GW7_07430 PE=3 SV=1                                                 |
| <b>G5C0Q7</b> | MICOS complex subunit MIC13 OS=Heterocephalus glaber OX=10181 GN=GW7_20494 PE=3 SV=1                                              |
| <b>G5BMJ9</b> | Tripartite motif-containing protein 2 OS=Heterocephalus glaber OX=10181 GN=GW7_21592 PE=4 SV=1                                    |
| <b>G5C8B4</b> | DnaJ homolog subfamily C member 5 OS=Heterocephalus glaber OX=10181 GN=DNAJC5 PE=4 SV=1                                           |
| <b>G5BMM2</b> | Pleckstrin-like protein domain-containing family A member 6 OS=Heterocephalus glaber OX=10181 GN=GW7_11215 PE=4 SV=1              |
| <b>G5BG23</b> | Pyridoxal kinase OS=Heterocephalus glaber OX=10181 GN=GW7_06825 PE=4 SV=1                                                         |
| <b>G5B9Q5</b> | Zinc transporter ZIP14 (Fragment) OS=Heterocephalus glaber OX=10181 GN=GW7_20731 PE=4 SV=1                                        |
| <b>G5BNV9</b> | Monocarboxylate transporter 1 OS=Heterocephalus glaber OX=10181 GN=GW7_03045 PE=2 SV=1                                            |
| <b>G5ATA6</b> | Poly(RC)-binding protein 3 OS=Heterocephalus glaber OX=10181 GN=GW7_13730 PE=4 SV=1                                               |
| <b>G5B6T4</b> | Presequence protease, mitochondrial OS=Heterocephalus glaber OX=10181 GN=GW7_21507 PE=4 SV=1                                      |
| <b>G5ANV7</b> | Phosphoglycerate mutase family member 5 OS=Heterocephalus glaber OX=10181 GN=GW7_09572 PE=4 SV=1                                  |
| <b>G5C9Y4</b> | E3 ubiquitin-protein ligase HUWE1 OS=Heterocephalus glaber OX=10181 GN=GW7_13236 PE=4 SV=1                                        |
| <b>G5BMH1</b> | Filamin-B OS=Heterocephalus glaber OX=10181 GN=GW7_03972 PE=4 SV=1                                                                |
| <b>G5AZK8</b> | NADH dehydrogenase (Ubiquinone) iron-sulfur protein 7, mitochondrial OS=Heterocephalus glaber OX=10181 GN=NDUFS7 PE=3 SV=1        |
| <b>G5AVC6</b> | UDP-glucuronosyltransferase OS=Heterocephalus glaber OX=10181 GN=GW7_15973 PE=3 SV=1                                              |
| <b>G5BPH4</b> | Tubulin polymerization-promoting protein OS=Heterocephalus glaber OX=10181 GN=GW7_14713 PE=4 SV=1                                 |
| <b>G5BRJ4</b> | Induced myeloid leukemia cell differentiation protein Mcl-1-like protein OS=Heterocephalus glaber OX=10181 GN=GW7_20578 PE=4 SV=1 |
| <b>G5BF40</b> | Ras-related C3 botulinum toxin substrate 1 (Fragment) OS=Heterocephalus glaber OX=10181 GN=GW7_17917 PE=4 SV=1                    |
| <b>G5BII9</b> | Putative ubiquitin carboxyl-terminal hydrolase FAF-Y OS=Heterocephalus glaber OX=10181 GN=GW7_10330 PE=3 SV=1                     |
| <b>G5BZV1</b> | Inosine-5'-monophosphate dehydrogenase OS=Heterocephalus glaber OX=10181 GN=IMPDH2 PE=3 SV=1                                      |
| <b>G5AQ53</b> | Mitochondrial pyruvate carrier OS=Heterocephalus glaber OX=10181 GN=GW7_21171 PE=3 SV=1                                           |

|               |                                                                                                                                    |
|---------------|------------------------------------------------------------------------------------------------------------------------------------|
| <b>G5BMZ1</b> | Microtubule-associated protein OS=Heterocephalus glaber OX=10181 GN=GW7_07674 PE=4 SV=1                                            |
| <b>G5BYS8</b> | ATP-dependent RNA helicase DDX39 OS=Heterocephalus glaber OX=10181 GN=GW7_16048 PE=4 SV=1                                          |
| <b>G5B8W4</b> | 40S ribosomal protein S27a OS=Heterocephalus glaber OX=10181 GN=RPS27A PE=4 SV=1                                                   |
| <b>G5AYV0</b> | Synaptogyrin-1 (Fragment) OS=Heterocephalus glaber OX=10181 GN=GW7_02597 PE=4 SV=1                                                 |
| <b>G5B151</b> | YTH domain-containing protein 1 OS=Heterocephalus glaber OX=10181 GN=GW7_09283 PE=4 SV=1                                           |
| <b>G5AMJ9</b> | Microtubule-actin cross-linking factor 1, isoform 4 OS=Heterocephalus glaber OX=10181 GN=GW7_20337 PE=4 SV=1                       |
| <b>G5BFF6</b> | Cytochrome b-c1 complex subunit 8 OS=Heterocephalus glaber OX=10181 GN=UQCRQ PE=4 SV=1                                             |
| <b>G5BQV7</b> | Seryl-tRNA synthetase, cytoplasmic OS=Heterocephalus glaber OX=10181 GN=GW7_20121 PE=4 SV=1                                        |
| <b>G5APB6</b> | BTB/POZ domain-containing protein KCTD8 OS=Heterocephalus glaber OX=10181 GN=GW7_17018 PE=4 SV=1                                   |
| <b>G5ARH5</b> | Gamma-aminobutyric acid receptor subunit beta-2 OS=Heterocephalus glaber OX=10181 GN=GW7_13529 PE=3 SV=1                           |
| <b>G5AQT1</b> | Bifunctional aminoacyl-tRNA synthetase OS=Heterocephalus glaber OX=10181 GN=GW7_09428 PE=3 SV=1                                    |
| <b>G5C052</b> | Tricarboxylate transport protein, mitochondrial isoform a OS=Heterocephalus glaber OX=10181 GN=SLC25A1 PE=3 SV=1                   |
| <b>G5BT64</b> | Claudin OS=Heterocephalus glaber OX=10181 GN=GW7_13967 PE=3 SV=1                                                                   |
| <b>G5C758</b> | Zinc transporter ZIP6 OS=Heterocephalus glaber OX=10181 GN=GW7_04828 PE=4 SV=1                                                     |
| <b>G5C6M4</b> | Casein kinase II subunit alpha OS=Heterocephalus glaber OX=10181 GN=GW7_20923 PE=4 SV=1                                            |
| <b>G5API3</b> | 60S ribosomal protein L13 OS=Heterocephalus glaber OX=10181 GN=RPL13 PE=3 SV=1                                                     |
| <b>G5C8G8</b> | Cell cycle exit and neuronal differentiation protein 1 OS=Heterocephalus glaber OX=10181 GN=CEND1 PE=4 SV=1                        |
| <b>G5AZJ5</b> | Actin-related protein 2/3 complex subunit 2 OS=Heterocephalus glaber OX=10181 GN=GW7_09502 PE=4 SV=1                               |
| <b>G5AJY0</b> | Histone-lysine N-methyltransferase OS=Heterocephalus glaber OX=10181 GN=GW7_10539 PE=3 SV=1                                        |
| <b>G5AP00</b> | Polyadenylate-binding protein OS=Heterocephalus glaber OX=10181 GN=GW7_00765 PE=3 SV=1                                             |
| <b>G5B441</b> | ELAV-like protein 1 OS=Heterocephalus glaber OX=10181 GN=GW7_09793 PE=4 SV=1                                                       |
| <b>G5BFW4</b> | Protein NDRG2 OS=Heterocephalus glaber OX=10181 GN=GW7_08519 PE=4 SV=1                                                             |
| <b>G5BJ57</b> | Brain-specific angiogenesis inhibitor 1-associated protein 2 OS=Heterocephalus glaber OX=10181 GN=GW7_04072 PE=4 SV=1              |
| <b>G5ANZ0</b> | Cytochrome c oxidase subunit 6C OS=Heterocephalus glaber OX=10181 GN=GW7_00755 PE=4 SV=1                                           |
| <b>G5ALG1</b> | SLIT-ROBO Rho GTPase-activating protein 1 OS=Heterocephalus glaber OX=10181 GN=GW7_05007 PE=4 SV=1                                 |
| <b>G5AMV2</b> | Actin-related protein 3B (Fragment) OS=Heterocephalus glaber OX=10181 GN=GW7_02070 PE=3 SV=1                                       |
| <b>G5BSL6</b> | Eukaryotic translation initiation factor 3 subunit E OS=Heterocephalus glaber OX=10181 GN=EIF3E PE=3 SV=1                          |
| <b>G5AYT2</b> | Putative ATP-dependent RNA helicase DDX17 OS=Heterocephalus glaber OX=10181 GN=GW7_02579 PE=3 SV=1                                 |
| <b>G5BG17</b> | ES1 protein-like protein, mitochondrial OS=Heterocephalus glaber OX=10181 GN=GW7_06819 PE=4 SV=1                                   |
| <b>G5BI50</b> | 26S protease regulatory subunit 7 OS=Heterocephalus glaber OX=10181 GN=PSMC2 PE=3 SV=1                                             |
| <b>G5BP41</b> | RNA-binding protein 25 OS=Heterocephalus glaber OX=10181 GN=GW7_04864 PE=4 SV=1                                                    |
| <b>G5BS22</b> | Aldo-keto reductase family 1 member B10 OS=Heterocephalus glaber OX=10181 GN=GW7_03813 PE=4 SV=1                                   |
| <b>G5BV92</b> | Mu-crystallin-like protein OS=Heterocephalus glaber OX=10181 GN=CRYM PE=4 SV=1                                                     |
| <b>G5B8M4</b> | EH domain-containing protein 3 OS=Heterocephalus glaber OX=10181 GN=GW7_12819 PE=3 SV=1                                            |
| <b>G5APW2</b> | Cytochrome b-c1 complex subunit 9 isoform b OS=Heterocephalus glaber OX=10181 GN=UQCR10 PE=4 SV=1                                  |
| <b>G5C892</b> | Glycerophosphodiester phosphodiesterase domain-containing protein 1 isoform 1 OS=Heterocephalus glaber OX=10181 GN=GDPD1 PE=4 SV=1 |

|               |                                                                                                                                        |
|---------------|----------------------------------------------------------------------------------------------------------------------------------------|
| <b>G5ATT8</b> | Proto-oncogene tyrosine-protein kinase Yes OS=Heterocephalus glaber OX=10181 GN=GW7_12511 PE=3 SV=1                                    |
| <b>G5BG05</b> | Voltage-dependent N-type calcium channel subunit alpha (Fragment) OS=Heterocephalus glaber OX=10181 GN=GW7_03938 PE=3 SV=1             |
| <b>G5AZE7</b> | Sodium/hydrogen exchanger (Fragment) OS=Heterocephalus glaber OX=10181 GN=GW7_06523 PE=3 SV=1                                          |
| <b>G5C816</b> | Protein transport protein SEC23 OS=Heterocephalus glaber OX=10181 GN=GW7_07357 PE=3 SV=1                                               |
| <b>G5B8T2</b> | Synaptotagmin-3 OS=Heterocephalus glaber OX=10181 GN=GW7_15329 PE=4 SV=1                                                               |
| <b>G5BCI6</b> | LETM1 and EF-hand domain-containing protein 1, mitochondrial OS=Heterocephalus glaber OX=10181 GN=GW7_18954 PE=4 SV=1                  |
| <b>G5AS20</b> | Phospholipid-transporting ATPase (Fragment) OS=Heterocephalus glaber OX=10181 GN=GW7_06616 PE=3 SV=1                                   |
| <b>G5C2H5</b> | GTP-binding protein Di-Ras2 OS=Heterocephalus glaber OX=10181 GN=DIRAS2 PE=4 SV=1                                                      |
| <b>G5B4W2</b> | Phosphatidate cytidyltransferase OS=Heterocephalus glaber OX=10181 GN=CDS2 PE=3 SV=1                                                   |
| <b>G5BFW6</b> | RSM22-like protein, mitochondrial OS=Heterocephalus glaber OX=10181 GN=GW7_08521 PE=4 SV=1                                             |
| <b>G5AX92</b> | Pentatricopeptide repeat-containing protein 1 OS=Heterocephalus glaber OX=10181 GN=GW7_06631 PE=4 SV=1                                 |
| <b>G5ALP8</b> | Putative saccharopine dehydrogenase OS=Heterocephalus glaber OX=10181 GN=SCCPDH PE=4 SV=1                                              |
| <b>E3VX74</b> | 40S ribosomal protein S27 OS=Heterocephalus glaber OX=10181 GN=GW7_11176 PE=2 SV=1                                                     |
| <b>G5BLV4</b> | Guanylate cyclase soluble subunit beta-1 (Fragment) OS=Heterocephalus glaber OX=10181 GN=GW7_04529 PE=3 SV=1                           |
| <b>G5B4M3</b> | NADH dehydrogenase (Ubiquinone) 1 alpha subcomplex subunit 7 OS=Heterocephalus glaber OX=10181 GN=NDUFA7 PE=4 SV=1                     |
| <b>G5BKP8</b> | Guanylate cyclase soluble subunit beta-2 OS=Heterocephalus glaber OX=10181 GN=GW7_20460 PE=3 SV=1                                      |
| <b>G5ANX1</b> | Ribosomal protein L15 OS=Heterocephalus glaber OX=10181 GN=GW7_19814 PE=3 SV=1                                                         |
| <b>G5C396</b> | Platelet-derived growth factor receptor beta OS=Heterocephalus glaber OX=10181 GN=GW7_00120 PE=3 SV=1                                  |
| <b>G5BD74</b> | Transporter OS=Heterocephalus glaber OX=10181 GN=GW7_07809 PE=3 SV=1                                                                   |
| <b>G5B4R7</b> | Small nuclear ribonucleoprotein-associated protein B (Fragment) OS=Heterocephalus glaber OX=10181 GN=GW7_03184 PE=4 SV=1               |
| <b>G5BY57</b> | 40S ribosomal protein S2 OS=Heterocephalus glaber OX=10181 GN=GW7_05742 PE=3 SV=1                                                      |
| <b>G5BAV5</b> | Sulfurtransferase OS=Heterocephalus glaber OX=10181 GN=GW7_03677 PE=4 SV=1                                                             |
| <b>G5BQD5</b> | Histone H1.1 OS=Heterocephalus glaber OX=10181 GN=GW7_13921 PE=3 SV=1                                                                  |
| <b>G5C4W8</b> | Dolichyl-diphosphooligosaccharide--protein glycosyltransferase 48 kDa subunit OS=Heterocephalus glaber OX=10181 GN=GW7_01845 PE=3 SV=1 |
| <b>G5BY63</b> | Hydroxyacylglutathione hydrolase, mitochondrial OS=Heterocephalus glaber OX=10181 GN=GW7_05748 PE=3 SV=1                               |
| <b>G5AUX4</b> | Small nuclear ribonucleoprotein Sm D2 OS=Heterocephalus glaber OX=10181 GN=SNRPD2 PE=3 SV=1                                            |
| <b>G5AZC2</b> | Polyadenylate-binding protein 1-like 2 OS=Heterocephalus glaber OX=10181 GN=GW7_11796 PE=4 SV=1                                        |
| <b>G5BAR9</b> | Phosphoinositide phospholipase C (Fragment) OS=Heterocephalus glaber OX=10181 GN=GW7_19596 PE=4 SV=1                                   |
| <b>G5B165</b> | Multidrug resistance-associated protein 4 OS=Heterocephalus glaber OX=10181 GN=ABCC4 PE=4 SV=1                                         |
| <b>G5B8Q4</b> | Protein arginine N-methyltransferase 1 OS=Heterocephalus glaber OX=10181 GN=PRMT1 PE=3 SV=1                                            |
| <b>G5AS88</b> | Phosphatidylinositol-5-phosphate 4-kinase type-2 gamma OS=Heterocephalus glaber OX=10181 GN=GW7_02091 PE=4 SV=1                        |
| <b>G5ARB5</b> | Histone-lysine N-methyltransferase OS=Heterocephalus glaber OX=10181 GN=GW7_14304 PE=4 SV=1                                            |
| <b>G5BHN3</b> | Hypoxia up-regulated protein 1 OS=Heterocephalus glaber OX=10181 GN=GW7_18677 PE=3 SV=1                                                |
| <b>G5BX32</b> | Heat shock protein HSP 90-alpha OS=Heterocephalus glaber OX=10181 GN=GW7_11861 PE=4 SV=1                                               |



|               |                                                                                                                                      |
|---------------|--------------------------------------------------------------------------------------------------------------------------------------|
| <b>G5AZF7</b> | NADH dehydrogenase [ubiquinone] 1 beta subcomplex subunit 11, mitochondrial OS=Heterocephalus glaber OX=10181 GN=GW7_11280 PE=4 SV=1 |
| <b>G5AVS2</b> | Rho-related GTP-binding protein RhoG OS=Heterocephalus glaber OX=10181 GN=RHO G PE=4 SV=1                                            |
| <b>G5B3A8</b> | Kinesin-like protein KIF21B OS=Heterocephalus glaber OX=10181 GN=GW7_12887 PE=3 SV=1                                                 |
| <b>G5BJZ6</b> | Proteasome subunit alpha type OS=Heterocephalus glaber OX=10181 GN=PSMA2 PE=3 SV=1                                                   |
| <b>G5B4Q8</b> | Protein FAM49B OS=Heterocephalus glaber OX=10181 GN=FAM49B PE=4 SV=1                                                                 |
| <b>G5BA12</b> | Ewing's tumor-associated antigen 1 OS=Heterocephalus glaber OX=10181 GN=GW7_02204 PE=4 SV=1                                          |
| <b>G5BPF6</b> | Amine oxidase [flavin-containing] A (Fragment) OS=Heterocephalus glaber OX=10181 GN=GW7_15340 PE=4 SV=1                              |
| <b>G5C147</b> | Ras-related protein Rab-18 OS=Heterocephalus glaber OX=10181 GN=GW7_13698 PE=4 SV=1                                                  |
| <b>G5BWA4</b> | Proteasome subunit beta type-6 OS=Heterocephalus glaber OX=10181 GN=GW7_04618 PE=4 SV=1                                              |
| <b>G5BTR3</b> | CDK5 and ABL1 enzyme substrate 1 (Fragment) OS=Heterocephalus glaber OX=10181 GN=GW7_00883 PE=4 SV=1                                 |
| <b>G5BHY5</b> | 60S ribosomal protein L11 (Fragment) OS=Heterocephalus glaber OX=10181 GN=GW7_07495 PE=3 SV=1                                        |
| <b>G5BCE5</b> | Peroxisomal protein 4 OS=Heterocephalus glaber OX=10181 GN=PRDX4 PE=4 SV=1                                                           |
| <b>G5BN40</b> | LanC-like protein 1 OS=Heterocephalus glaber OX=10181 GN=GW7_18199 PE=4 SV=1                                                         |
| <b>G5AW66</b> | NADH dehydrogenase [ubiquinone] 1 subunit C2 OS=Heterocephalus glaber OX=10181 GN=GW7_00914 PE=3 SV=1                                |
| <b>G5B1Y9</b> | Whirlin OS=Heterocephalus glaber OX=10181 GN=GW7_01024 PE=4 SV=1                                                                     |
| <b>G5BSB5</b> | G protein-coupled receptor kinase (Fragment) OS=Heterocephalus glaber OX=10181 GN=GW7_14698 PE=3 SV=1                                |
| <b>G5B1T3</b> | Aspartate--tRNA ligase, cytoplasmic OS=Heterocephalus glaber OX=10181 GN=DARS PE=3 SV=1                                              |
| <b>G5AYQ6</b> | Zinc transporter 7 OS=Heterocephalus glaber OX=10181 GN=GW7_21185 PE=4 SV=1                                                          |
| <b>G5C2H3</b> | Methylglutaconyl-CoA hydratase, mitochondrial (Fragment) OS=Heterocephalus glaber OX=10181 GN=GW7_21658 PE=3 SV=1                    |
| <b>G5BTT2</b> | Nipped-B protein OS=Heterocephalus glaber OX=10181 GN=GW7_20141 PE=3 SV=1                                                            |
| <b>G5AU90</b> | NADH dehydrogenase (Ubiquinone) 1 beta subcomplex subunit 4 isoform 2 OS=Heterocephalus glaber OX=10181 GN=NDUFB4 PE=4 SV=1          |
| <b>G5B1E5</b> | PI-PLC X domain-containing protein 2 isoform a OS=Heterocephalus glaber OX=10181 GN=PLCX2 PE=4 SV=1                                  |
| <b>G5C7R9</b> | Proteasome subunit beta OS=Heterocephalus glaber OX=10181 GN=PSMB1 PE=3 SV=1                                                         |
| <b>G5AYX6</b> | Pyridoxal phosphate phosphatase OS=Heterocephalus glaber OX=10181 GN=GW7_02557 PE=3 SV=1                                             |
| <b>G5B4V6</b> | Major prion protein OS=Heterocephalus glaber OX=10181 GN=GW7_03223 PE=3 SV=1                                                         |
| <b>G5AMX5</b> | Wiskott-Aldrich syndrome protein family member 3 OS=Heterocephalus glaber OX=10181 GN=GW7_15950 PE=4 SV=1                            |
| <b>G5C835</b> | Propionyl-CoA carboxylase beta chain, mitochondrial OS=Heterocephalus glaber OX=10181 GN=GW7_21808 PE=4 SV=1                         |
| <b>G5BJB4</b> | Tubulin-specific chaperone D OS=Heterocephalus glaber OX=10181 GN=GW7_04129 PE=4 SV=1                                                |
| <b>G5BA11</b> | Inositol 1,4,5-trisphosphate receptor type 1 OS=Heterocephalus glaber OX=10181 GN=GW7_04196 PE=4 SV=1                                |
| <b>G5AQ31</b> | Microsomal glutathione S-transferase 3 OS=Heterocephalus glaber OX=10181 GN=MGST3 PE=4 SV=1                                          |
| <b>G5AU96</b> | Glycogen synthase kinase-3 beta OS=Heterocephalus glaber OX=10181 GN=GW7_00983 PE=3 SV=1                                             |
| <b>G5AW75</b> | Non-specific serine/threonine protein kinase OS=Heterocephalus glaber OX=10181 GN=PAK1 PE=4 SV=1                                     |
| <b>G5BFY1</b> | Inactive hydroxysteroid dehydrogenase-like protein 1 OS=Heterocephalus glaber OX=10181 GN=GW7_15943 PE=3 SV=1                        |
| <b>G5BPN1</b> | Solute carrier family 2, facilitated glucose transporter member 3 OS=Heterocephalus glaber OX=10181 GN=GW7_17311 PE=3 SV=1           |
| <b>G5B8M0</b> | Proteasome subunit beta OS=Heterocephalus glaber OX=10181 GN=GW7_10314 PE=3 SV=1                                                     |
| <b>G5C8E9</b> | CtIP_N domain-containing protein OS=Heterocephalus glaber OX=10181 GN=GW7_09749 PE=4 SV=1                                            |
| <b>G5AULO</b> | Isocitrate dehydrogenase [NAD] subunit, mitochondrial OS=Heterocephalus glaber OX=10181 GN=GW7_10868 PE=3 SV=1                       |

|               |                                                                                                                                   |
|---------------|-----------------------------------------------------------------------------------------------------------------------------------|
| <b>G5BMR7</b> | Cleavage and polyadenylation specificity factor subunit 5 (Fragment) OS=Heterocephalus glaber OX=10181 GN=GW7_09347 PE=4 SV=1     |
| <b>G5BPE1</b> | tRNA-splicing ligase RtcB homolog OS=Heterocephalus glaber OX=10181 GN=RTCB PE=3 SV=1                                             |
| <b>G5CPG8</b> | Cytochrome c oxidase subunit 2 OS=Heterocephalus glaber OX=10181 GN=COX2 PE=3 SV=1                                                |
| <b>G5B795</b> | 60S ribosomal protein L31 OS=Heterocephalus glaber OX=10181 GN=GW7_13242 PE=4 SV=1                                                |
| <b>G5BGH1</b> | Methylmalonyl-CoA mutase, mitochondrial OS=Heterocephalus glaber OX=10181 GN=MUT PE=4 SV=1                                        |
| <b>G5AKT8</b> | Serine/threonine-protein kinase TAO3 OS=Heterocephalus glaber OX=10181 GN=GW7_10184 PE=4 SV=1                                     |
| <b>G5AUW0</b> | Glutamate decarboxylase 2 OS=Heterocephalus glaber OX=10181 GN=GW7_03484 PE=3 SV=1                                                |
| <b>G5C0H1</b> | E3 ubiquitin-protein ligase UBR5 (Fragment) OS=Heterocephalus glaber OX=10181 GN=GW7_07223 PE=4 SV=1                              |
| <b>G5B319</b> | Janus kinase and microtubule-interacting protein 1 OS=Heterocephalus glaber OX=10181 GN=GW7_14552 PE=4 SV=1                       |
| <b>G5ALH5</b> | ATP-dependent RNA helicase DDX3Y OS=Heterocephalus glaber OX=10181 GN=GW7_13691 PE=3 SV=1                                         |
| <b>G5BW10</b> | Epidermal growth factor receptor kinase substrate 8-like protein 1 OS=Heterocephalus glaber OX=10181 GN=GW7_11661 PE=4 SV=1       |
| <b>G5BBC0</b> | AP-3 complex subunit delta-1 OS=Heterocephalus glaber OX=10181 GN=GW7_07318 PE=4 SV=1                                             |
| <b>G5BXB6</b> | Protein KIAA1045 OS=Heterocephalus glaber OX=10181 GN=GW7_03431 PE=4 SV=1                                                         |
| <b>G5AZ64</b> | Stress-70 protein, mitochondrial OS=Heterocephalus glaber OX=10181 GN=GW7_21299 PE=4 SV=1                                         |
| <b>G5BF94</b> | Heat shock protein HSP 90-alpha 1 OS=Heterocephalus glaber OX=10181 GN=GW7_15044 PE=4 SV=1                                        |
| <b>G5B7K7</b> | 40S ribosomal protein S5 OS=Heterocephalus glaber OX=10181 GN=GW7_05598 PE=3 SV=1                                                 |
| <b>G5C8L3</b> | Cell adhesion molecule 2 (Fragment) OS=Heterocephalus glaber OX=10181 GN=GW7_20330 PE=4 SV=1                                      |
| <b>G5B0Z2</b> | Interferon-induced protein with tetratricopeptide repeats 1-like protein OS=Heterocephalus glaber OX=10181 GN=GW7_17423 PE=4 SV=1 |
| <b>G5AMI2</b> | U2 small nuclear ribonucleoprotein B OS=Heterocephalus glaber OX=10181 GN=SNRPB2 PE=4 SV=1                                        |
| <b>G5AX47</b> | 60S ribosomal protein L9 OS=Heterocephalus glaber OX=10181 GN=GW7_10035 PE=4 SV=1                                                 |
| <b>G5BH25</b> | Splicing factor 3B subunit 4 OS=Heterocephalus glaber OX=10181 GN=GW7_05788 PE=4 SV=1                                             |
| <b>G5BPV1</b> | Vomeromodulin OS=Heterocephalus glaber OX=10181 GN=GW7_12307 PE=4 SV=1                                                            |
| <b>G5AVQ5</b> | PRA1 family protein OS=Heterocephalus glaber OX=10181 GN=ARL6IP5 PE=3 SV=1                                                        |
| <b>G5BBG5</b> | Cleavage and polyadenylation specificity factor subunit 6 OS=Heterocephalus glaber OX=10181 GN=GW7_05464 PE=4 SV=1                |
| <b>G5BHP8</b> | Thy-1 membrane glycoprotein OS=Heterocephalus glaber OX=10181 GN=GW7_18692 PE=4 SV=1                                              |
| <b>G5BVT2</b> | Mothers against decapentaplegic homolog OS=Heterocephalus glaber OX=10181 GN=GW7_16263 PE=3 SV=1                                  |
| <b>G5BSL5</b> | Tetratricopeptide repeat protein 35 OS=Heterocephalus glaber OX=10181 GN=GW7_02334 PE=4 SV=1                                      |
| <b>G5BP98</b> | Ankyrin repeat domain-containing protein 16 (Fragment) OS=Heterocephalus glaber OX=10181 GN=GW7_20020 PE=4 SV=1                   |
| <b>G5ARR7</b> | Nik-related protein kinase OS=Heterocephalus glaber OX=10181 GN=GW7_10189 PE=4 SV=1                                               |
| <b>G5AN12</b> | Heat shock protein HSP 90-alpha OS=Heterocephalus glaber OX=10181 GN=GW7_15795 PE=4 SV=1                                          |
| <b>G5BG92</b> | CAP-Gly domain-containing linker protein 2 OS=Heterocephalus glaber OX=10181 GN=GW7_08910 PE=4 SV=1                               |
| <b>G5BI54</b> | Armadillo repeat-containing protein 10 OS=Heterocephalus glaber OX=10181 GN=GW7_03899 PE=4 SV=1                                   |
| <b>G5BVE2</b> | 26S proteasome non-ATPase regulatory subunit 12 isoform 2 OS=Heterocephalus glaber OX=10181 GN=PSMD12 PE=4 SV=1                   |
| <b>G5AK02</b> | Selenium-binding protein 1 (Fragment) OS=Heterocephalus glaber OX=10181 GN=GW7_10561 PE=4 SV=1                                    |
| <b>G5BAZ4</b> | 40S ribosomal protein S18 (Fragment) OS=Heterocephalus glaber OX=10181 GN=GW7_20354 PE=3 SV=1                                     |
| <b>G5BEK8</b> | Lipid phosphate phosphatase-related protein type 4 OS=Heterocephalus glaber OX=10181 GN=GW7_19429 PE=4 SV=1                       |

|               |                                                                                                                       |
|---------------|-----------------------------------------------------------------------------------------------------------------------|
| <b>G5AM31</b> | Heterogeneous nuclear ribonucleoprotein U (Fragment) OS=Heterocephalus glaber OX=10181 GN=GW7_16292 PE=4 SV=1         |
| <b>G5BBS9</b> | Annexin OS=Heterocephalus glaber OX=10181 GN=GW7_02904 PE=3 SV=1                                                      |
| <b>G5AQC9</b> | V-type proton ATPase proteolipid subunit OS=Heterocephalus glaber OX=10181 GN=ATP6V0C PE=3 SV=1                       |
| <b>G5C2G1</b> | Cathepsin D (Fragment) OS=Heterocephalus glaber OX=10181 GN=GW7_00398 PE=3 SV=1                                       |
| <b>G5AJX1</b> | Metabotropic glutamate receptor 3 OS=Heterocephalus glaber OX=10181 GN=GW7_15125 PE=3 SV=1                            |
| <b>G5BJ98</b> | Coiled-coil domain-containing protein 57 OS=Heterocephalus glaber OX=10181 GN=GW7_04113 PE=4 SV=1                     |
| <b>G5C1Y9</b> | Exportin-1 OS=Heterocephalus glaber OX=10181 GN=GW7_01327 PE=4 SV=1                                                   |
| <b>G5ALC9</b> | Sentrin-specific protease 5 OS=Heterocephalus glaber OX=10181 GN=GW7_00073 PE=4 SV=1                                  |
| <b>G5BIK5</b> | Synaptobrevin homolog YKT6 OS=Heterocephalus glaber OX=10181 GN=YKT6 PE=3 SV=1                                        |
| <b>G5BK21</b> | Ras GTPase-activating protein SynGAP OS=Heterocephalus glaber OX=10181 GN=GW7_09861 PE=4 SV=1                         |
| <b>G5BGL1</b> | 3-hydroxyisobutyryl-CoA hydrolase, mitochondrial (Fragment) OS=Heterocephalus glaber OX=10181 GN=GW7_01417 PE=3 SV=1  |
| <b>G5B3Z0</b> | Xanthine dehydrogenase/oxidase OS=Heterocephalus glaber OX=10181 GN=GW7_02630 PE=4 SV=1                               |
| <b>G5BNM3</b> | Multidrug resistance-associated protein 7 OS=Heterocephalus glaber OX=10181 GN=GW7_19146 PE=4 SV=1                    |
| <b>G5BHK5</b> | FXYD domain-containing ion transport regulator OS=Heterocephalus glaber OX=10181 GN=GW7_18649 PE=3 SV=1               |
| <b>G5C5Q8</b> | 60S ribosomal protein L8 OS=Heterocephalus glaber OX=10181 GN=GW7_19216 PE=3 SV=1                                     |
| <b>G5BTA7</b> | 15 kDa protein A OS=Heterocephalus glaber OX=10181 GN=GW7_17264 PE=3 SV=1                                             |
| <b>G5BB91</b> | 40S ribosomal protein S26 OS=Heterocephalus glaber OX=10181 GN=GW7_15770 PE=3 SV=1                                    |
| <b>G5AU42</b> | Voltage-dependent L-type calcium channel subunit beta-3 OS=Heterocephalus glaber OX=10181 GN=GW7_14474 PE=4 SV=1      |
| <b>G5ASC8</b> | Endophilin-B2 OS=Heterocephalus glaber OX=10181 GN=GW7_01898 PE=4 SV=1                                                |
| <b>G5C1R6</b> | Transcriptional repressor protein YY1 OS=Heterocephalus glaber OX=10181 GN=GW7_07411 PE=4 SV=1                        |
| <b>G5ATF3</b> | 60S ribosomal protein L23a OS=Heterocephalus glaber OX=10181 GN=GW7_14614 PE=3 SV=1                                   |
| <b>G5BPR5</b> | NADH dehydrogenase [ubiquinone] 1 alpha subcomplex subunit 6 OS=Heterocephalus glaber OX=10181 GN=GW7_19453 PE=3 SV=1 |
| <b>G5AYI8</b> | Heterogeneous nuclear ribonucleoprotein U-like protein 2 OS=Heterocephalus glaber OX=10181 GN=GW7_01782 PE=4 SV=1     |
| <b>G5BMY3</b> | Golgi SNAP receptor complex member 2 isoform A OS=Heterocephalus glaber OX=10181 GN=GOSR2 PE=3 SV=1                   |
| <b>G5BJM5</b> | 60S ribosomal protein L12 OS=Heterocephalus glaber OX=10181 GN=GW7_00296 PE=3 SV=1                                    |
| <b>G5AXN2</b> | 60S ribosomal protein L29 OS=Heterocephalus glaber OX=10181 GN=GW7_07753 PE=4 SV=1                                    |
| <b>G5AZL1</b> | 40S ribosomal protein S15 OS=Heterocephalus glaber OX=10181 GN=RPS15 PE=3 SV=1                                        |
| <b>G5B5R0</b> | Purine nucleoside phosphorylase (Fragment) OS=Heterocephalus glaber OX=10181 GN=GW7_14832 PE=4 SV=1                   |
| <b>G5BFU9</b> | N6-adenosine-methyltransferase 70 kDa subunit OS=Heterocephalus glaber OX=10181 GN=METTL3 PE=3 SV=1                   |
| <b>G5BFK4</b> | Lysine-specific demethylase 5A OS=Heterocephalus glaber OX=10181 GN=GW7_04041 PE=4 SV=1                               |
| <b>G5AUX0</b> | Optic atrophy 3 protein OS=Heterocephalus glaber OX=10181 GN=GW7_18095 PE=4 SV=1                                      |
| <b>G5CA43</b> | COP9 signalosome complex subunit 2 OS=Heterocephalus glaber OX=10181 GN=GW7_07415 PE=4 SV=1                           |
| <b>G5B630</b> | Small nuclear ribonucleoprotein Sm D3 (Fragment) OS=Heterocephalus glaber OX=10181 GN=SNRPD3 PE=3 SV=1                |
| <b>G5B6F6</b> | Stress-induced-phosphoprotein 1 OS=Heterocephalus glaber OX=10181 GN=STIP1 PE=4 SV=1                                  |
| <b>G5ANG5</b> | Cytoplasmic dynein 1 intermediate chain 2 OS=Heterocephalus glaber OX=10181 GN=GW7_10798 PE=4 SV=1                    |
| <b>G5AZT3</b> | 40S ribosomal protein S25 OS=Heterocephalus glaber OX=10181 GN=GW7_12498 PE=4 SV=1                                    |
| <b>G5B843</b> | RNA-binding protein 39 OS=Heterocephalus glaber OX=10181 GN=RBM39 PE=4 SV=1                                           |
| <b>G5AY62</b> | Glycine cleavage system P protein (Fragment) OS=Heterocephalus glaber OX=10181 GN=GW7_14031 PE=3 SV=1                 |

|               |                                                                                                                        |
|---------------|------------------------------------------------------------------------------------------------------------------------|
| <b>G5BXV7</b> | WD repeat-containing protein 24 OS=Heterocephalus glaber OX=10181 GN=WDR24 PE=4 SV=1                                   |
| <b>G5BSY3</b> | Zinc finger C3H1 domain-containing protein OS=Heterocephalus glaber OX=10181 GN=GW7_18229 PE=4 SV=1                    |
| <b>G5BYX2</b> | Hook-like protein 2 OS=Heterocephalus glaber OX=10181 GN=GW7_16092 PE=4 SV=1                                           |
| <b>G5C733</b> | NADH dehydrogenase (Ubiquinone) 1 alpha subcomplex subunit 4 OS=Heterocephalus glaber OX=10181 GN=NDUFA4 PE=4 SV=1     |
| <b>G5BV08</b> | TATA-binding protein-associated factor 172 OS=Heterocephalus glaber OX=10181 GN=GW7_21610 PE=4 SV=1                    |
| <b>G5BA34</b> | Receptor expression-enhancing protein OS=Heterocephalus glaber OX=10181 GN=GW7_10077 PE=3 SV=1                         |
| <b>G5B224</b> | Hsp90 co-chaperone Cdc37 OS=Heterocephalus glaber OX=10181 GN=CDC37 PE=4 SV=1                                          |
| <b>G5AUW3</b> | Abl interactor 1 OS=Heterocephalus glaber OX=10181 GN=GW7_03487 PE=4 SV=1                                              |
| <b>G5ASG4</b> | 60 kDa SS-A/Ro ribonucleoprotein isoform 2 OS=Heterocephalus glaber OX=10181 GN=TROVE2 PE=4 SV=1                       |
| <b>G5B398</b> | Neuron navigator 1 (Fragment) OS=Heterocephalus glaber OX=10181 GN=GW7_12877 PE=4 SV=1                                 |
| <b>G5AQ82</b> | Structural maintenance of chromosomes protein OS=Heterocephalus glaber OX=10181 GN=GW7_15234 PE=3 SV=1                 |
| <b>G5BYM6</b> | Proline-rich transmembrane protein 2 (Fragment) OS=Heterocephalus glaber OX=10181 GN=GW7_11901 PE=4 SV=1               |
| <b>G5C354</b> | Cytoplasmic aconitate hydratase OS=Heterocephalus glaber OX=10181 GN=GW7_13107 PE=2 SV=1                               |
| <b>G5B6T5</b> | Regulator of nonsense transcripts 2 OS=Heterocephalus glaber OX=10181 GN=GW7_21508 PE=4 SV=1                           |
| <b>G5C3G3</b> | Valyl-tRNA synthetase (Fragment) OS=Heterocephalus glaber OX=10181 GN=GW7_04793 PE=3 SV=1                              |
| <b>G5B1U5</b> | Propionyl-CoA carboxylase alpha chain, mitochondrial OS=Heterocephalus glaber OX=10181 GN=GW7_10944 PE=4 SV=1          |
| <b>G5BJD7</b> | 40S ribosomal protein S16 OS=Heterocephalus glaber OX=10181 GN=RPS16 PE=3 SV=1                                         |
| <b>G5BZX2</b> | Kinase OS=Heterocephalus glaber OX=10181 GN=GW7_19927 PE=3 SV=1                                                        |
| <b>G5AL57</b> | Interphotoreceptor matrix proteoglycan 1 OS=Heterocephalus glaber OX=10181 GN=GW7_21555 PE=4 SV=1                      |
| <b>G5C9D3</b> | Guanine nucleotide-binding protein subunit beta-5 OS=Heterocephalus glaber OX=10181 GN=GW7_04217 PE=4 SV=1             |
| <b>G5B580</b> | Single-stranded DNA-binding protein, mitochondrial (Fragment) OS=Heterocephalus glaber OX=10181 GN=GW7_11856 PE=3 SV=1 |
| <b>G5BCV4</b> | Rab-interacting lysosomal protein OS=Heterocephalus glaber OX=10181 GN=GW7_05093 PE=4 SV=1                             |
| <b>G5BJM9</b> | Disks large-associated protein 3 OS=Heterocephalus glaber OX=10181 GN=GW7_00407 PE=4 SV=1                              |
| <b>G5B304</b> | SH3 domain and tetratricopeptide repeats-containing protein 1 OS=Heterocephalus glaber OX=10181 GN=GW7_14568 PE=4 SV=1 |
| <b>G5C420</b> | Dynein light chain OS=Heterocephalus glaber OX=10181 GN=DYNLL2 PE=3 SV=1                                               |
| <b>G5C6S8</b> | Coronin OS=Heterocephalus glaber OX=10181 GN=GW7_09953 PE=3 SV=1                                                       |
