# Supplementary figures and images for: Acute Hypoxia Alters Extracellular Vesicle Signatures and the Brain Citrullinome of Naked Mole-Rats (Heterocephalus glaber)
Source: MDPI journal article supplement (doi:10.3390/ijms23094683), 2022-04-23

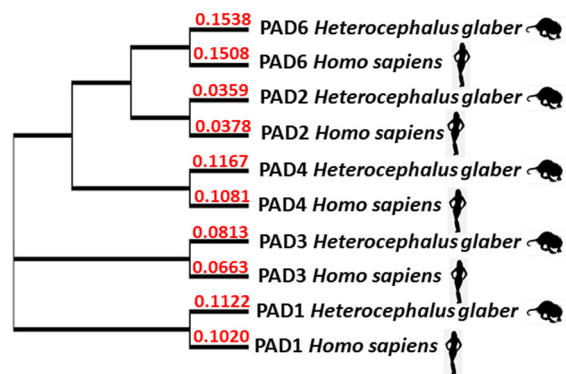

**Figure S1.** Phylogeny PAD (1).

Supplement: s1 [file s1]
